1           Deep mutational scanning reveals characteristics  
2           important for targeting of the tail-anchored protein Fis1

3  
4   Abdurrahman Keskin<sup>†</sup>, Emel Akdoğan, Cory D. Dunn<sup>‡</sup>

5  
6   Department of Molecular Biology and Genetics, Koç University, Sarıyer, İstanbul,  
7   Turkey

8  
9   <sup>†</sup> Current affiliation:

10   Department of Biological Sciences  
11   Columbia University  
12   New York, NY 10027

13  
14   <sup>‡</sup> Corresponding author

15   Dr. Cory Dunn  
16   Koç Üniversitesi  
17   Fen Fakültesi  
18   Rumelifeneri Yolu  
19   Sarıyer, İstanbul 34450  
20   Turkey  
21   Email: cdunn@ku.edu.tr  
22   Phone: +90 212 338 1449  
23   Fax: +90 212 338 1559

24  
25   Running head: Comprehensive analysis of Fis1 TA

26   Abbreviations: TA, tail anchor; OM, outer membrane; MAD, membrane-anchoring  
27   domain; 3-AT, 3-aminotriazole; CHX, cycloheximide

28

29 **ABSTRACT:**

30

31 Proteins localized to mitochondria by a carboxyl-terminal tail anchor (TA) play roles in  
32 apoptosis, mitochondrial dynamics, and mitochondrial protein import. To reveal  
33 characteristics of TAs that may be important for mitochondrial targeting, we focused  
34 our attention upon the TA of the *Saccharomyces cerevisiae* Fis1 protein. Specifically,  
35 we generated a library of Fis1p TA variants fused to the Gal4 transcription factor, then,  
36 using next-generation sequencing, revealed which Fis1p TA mutations inhibited  
37 membrane insertion and allowed Gal4p activity in the nucleus. Prompted by our global  
38 analysis, we subsequently analyzed the ability of individual Fis1p TA mutants to  
39 localize to mitochondria. Our findings suggest that the membrane-associated domain  
40 of Fis1p TA may be bipartite in nature, and we encountered evidence that the positively  
41 charged patch at the carboxyl-terminus of Fis1p is required for both membrane  
42 insertion and organelle specificity. Furthermore, lengthening or shortening the Fis1 TA  
43 by up to three amino acids did not inhibit mitochondrial targeting, arguing against a  
44 model in which TA length directs insertion of TAs at specific organelles. Most  
45 importantly, positively charged residues were more acceptable at several positions  
46 within the membrane-associated domain of the Fis1p TA than negatively charged  
47 residues. These findings, emerging from the first high-resolution analysis of an  
48 organelle targeting sequence by deep mutational scanning, provide strong, *in vivo*  
49 evidence that lysine and arginine can “snorkel,” or become stably incorporated within a  
50 lipid bilayer by placing terminal charges of their side chains at the membrane interface.

51

52

53 **INTRODUCTION:**

54

55 Proteins inserted within the mitochondrial outer membrane (OM) by a carboxyl-terminal  
56 tail anchor (TA) are important for programmed cell death, mitochondrial protein import,  
57 and the control of mitochondrial shape and number (Wattenberg and Lithgow 2001).

58 While ER-directed tail-anchored proteins can take advantage of a conserved set of  
59 soluble proteins and membrane-bound receptors (Denic *et al.* 2013; Johnson *et al.*  
60 2013), the machinery targeting many TAs to mitochondria is yet to be discovered (Lee  
61 *et al.* 2014; Neupert 2015), and genetic and biochemical evidence suggest that  
62 spontaneous insertion of TAs at mitochondria may occur without the need for a  
63 translocation machinery (Setoguchi *et al.* 2006; Kemper *et al.* 2008). Furthermore,  
64 some tail-anchored proteins can be dual-localized to mitochondria and other  
65 organelles (Borgese and Fasana 2011), but how membrane specificity is controlled is  
66 unclear. TA targeting seems to depend, in general, upon incompletely defined  
67 structural characteristics of the TA rather than a defined consensus sequence (Beilharz  
68 2003; Rapaport 2003; Borgese *et al.* 2007).

69

70 Genetic selection schemes using the organism *Saccharomyces cerevisiae* have been of  
71 high value in understanding how proteins reach their proper destination within  
72 eukaryotic cells. During such studies, a protein required for survival under selective  
73 conditions can be mislocalized, and thereby made inactive, by a targeting sequence  
74 utilized by the transport process being studied. Next, mutations that allow return of this  
75 mistargeted protein to a region of the cell at which it can perform its function are  
76 recovered under selective conditions. *Trans* factors related to protein targeting are  
77 identified by standard genetic approaches. Alternatively, *cis* mutations in the targeting  
78 sequence are revealed, typically by Sanger sequencing of individual fusion construct  
79 clones. Most prominently, this genetic approach to studying protein targeting and  
80 transport has been important in understanding protein transit to and through the  
81 endomembrane system (Deshaies and Schekman 1987; Robinson *et al.* 1988; Stirling  
82 *et al.* 1992). This approach has also been applied to the study of protein import and

83 export at the mitochondrial inner membrane (Jensen *et al.* 1992; Maarse *et al.* 1992; He  
84 and Fox 1999).

85

86 Even with the availability of these powerful genetic strategies, a fine-grained analysis of  
87 any single eukaryotic protein targeting signal has been lacking. However, with the  
88 advent of next-generation sequencing, more comprehensive studies of protein  
89 targeting sequences are possible. In this study, we successfully coupled genetic  
90 selection to next-generation sequence analysis in order to define characteristics  
91 important for localization of the tail-anchored Fis1 protein to the mitochondrial outer  
92 membrane (OM).

93

94 **RESULTS:**

95

96 *Localization to mitochondria via the Fis1 tail anchor prevents Gal4-mediated*  
97 *transcriptional activation*

98

99 The TA of Fis1p is necessary (Mozdy *et al.* 2000; Beilharz 2003) and sufficient (Kemper  
100 *et al.* 2008; Förtsch *et al.* 2011) for insertion of this polypeptide into the mitochondrial  
101 OM. No cellular machinery involved in Fis1p insertion has been identified (Kemper *et al.*  
102 2008). Fis1p has been suggested to reach a final topology in the outer membrane in  
103 which the amino-terminal bulk of the protein faces the cytosol, a very short and  
104 positively charged carboxyl-terminus protrudes into the mitochondrial intermembrane  
105 space, and the two are connected by a membrane-anchoring domain (MAD) passing  
106 through the OM (Mozdy *et al.* 2000). In developing our selection for TA mutations that  
107 diminish Fis1p targeting, we reasoned that fusion of a transcription factor to Fis1p  
108 would lead to insertion within the mitochondrial OM and a lack of nuclear function  
109 (Figure 1A). Mutations within the TA of Fis1p that prevent effective membrane insertion  
110 would, however, presumably allow the linked transcription factor to enter the nucleus,  
111 promote expression of its targets, and allow survival under specific selective  
112 conditions, provided that the fusion protein is not degraded, aggregated, or  
113 misdirected to another cellular location. Toward this goal, we generated a construct  
114 containing the Gal4 transcription factor at the amino terminal end of the polypeptide  
115 and full-length Fis1p at the carboxyl terminal end of the protein, since *S. cerevisiae*  
116 strains allowing titratable selection based upon nuclear entry and subsequent binding  
117 to Gal4p-responsive DNA elements are readily available. Superfolder GFP (Pédelacq *et al.*  
118 2005) was placed between the Gal4 and Fis1 moieties and was visible at  
119 mitochondria upon overexpression of this fusion protein (Figure 1B). While Fis1p has  
120 been reported to be homogeneously distributed on the mitochondrial surface (Mozdy *et al.*  
121 2000), puncta containing Gal4-sfGFP-Fis1p are observed, perhaps due to the  
122 formation of heteromeric complexes with nuclear import components attempting to  
123 transport Gal4-sfGFP-Fis1p to the nucleus.

124

125 To assess failed Gal4-sfGFP-Fis1p targeting to mitochondria, we specifically took  
126 advantage of the Gal4-driven *HIS3* and *URA3* auxotrophic markers in MaV203, a strain  
127 commonly used for yeast-two-hybrid assays (Vidal *et al.* 1996a). Similar to cells  
128 containing an empty vector, Gal4p fused to Fis1p was unable to allow proliferation on  
129 medium lacking histidine and containing 20mM 3-aminotriazole (3-AT) to competitively  
130 inhibit any His3p produced independently of Gal4p activation (Durfee *et al.* 1993) or in  
131 medium lacking uracil (SC-Ura) (Figure 1C). However, the same Gal4-sfGFP-Fis1  
132 polypeptide devoid of its TA [Gal4-sfGFP-Fis1( $\Delta$ TA)] permitted ample proliferation on  
133 the same two selective media. This result indicated that our fusion protein could  
134 translocate to the nucleus upon TA disruption and that any potential lipid binding  
135 mediated by the cytosolic domain of Fis1p (Wells and Hill 2011) will not prevent genetic  
136 assessment of TA localization.

137

138 We immediately sought mutations in the TA that would block targeting of Gal4-sfGFP-  
139 Fis1p to the mitochondrial OM by isolating colonies spontaneously arising on medium  
140 lacking uracil. Limited sequencing of the constructs encoding Gal4-sfGFP-Fis1p within  
141 these isolates revealed at least seven nonsense and 19 frameshift mutations out of a  
142 total of 32 plasmids analyzed. While these findings further validated the link between  
143 proliferation under selective conditions and damage to the Fis1p TA, continued  
144 encounters with nonsense and frameshift mutations would not be greatly informative  
145 regarding sequential or structural determinants important for TA targeting. As  
146 expected, we noted that release of the fusion construct from mitochondria following  
147 mutation of the Fis1p TA leads to detection of sfGFP in the nucleus (C. Dunn,  
148 unpublished observations).

149

150 In the strain used for our selective scheme, a Ura<sup>+</sup> phenotype requires greater Gal4-  
151 dependent transcriptional activation than is required for a His<sup>+</sup> phenotype (Vidal *et al.*  
152 1996b). Therefore, we reasoned that initial selection of TA mutants based on a His<sup>+</sup>  
153 phenotype may provide informative mutations that weaken, but do not totally inhibit

154 membrane association. We used mutagenic PCR to generate altered TAs within the  
155 context of a Gal4-sfGFP-Fis1 fusion protein. We then isolated four colonies that  
156 proliferated upon SMM-His medium containing 20mM 3-AT, yet exhibited diminished  
157 proliferation on SC-Ura medium when compared to cells expressing the Gal4-sfGFP-  
158 Fis1( $\Delta$ TA) polypeptide. Sanger sequencing of the region encoding the TA of Gal4-  
159 sfGFP-Fis1p within these colonies revealed one clone containing a V145E mutation  
160 (amino acid numbering provided in this study will correspond to that of the unmodified,  
161 full-length Fis1 protein; the necessary and sufficient region for mitochondrial  
162 association of Fis1p begins at amino acid L129), two clones containing a L139P  
163 mutation, and one clone harboring two mutations: L129P and V138A. Serial dilution  
164 assays (Figure 2A) confirmed that V145E and L139P provided a less than maximal, but  
165 still apparent Ura<sup>+</sup> phenotype, with the V145E mutant allowing more rapid proliferation  
166 on medium lacking uracil than the L139P mutant. The L129P/V138A mutant provided a  
167 His<sup>+</sup> phenotype, but could not drive uracil prototrophy, suggesting a less severe  
168 localization defect than that exhibited by the other two mutant TAs. Interestingly, the  
169 V145E mutation falls within the predicted MAD of the Fis1p TA (Figure S1A), consistent  
170 with poor accommodation of a negatively charged amino acid within this hydrophobic  
171 stretch of amino acids. Moreover, the Fis1p TA is predicted to be mostly alpha-helical  
172 in nature, and some evidence suggests that helicity is an important determinant of TA  
173 targeting to mitochondria (Wattenberg *et al.* 2007). Therefore, isolation of the  
174 potentially helix-disrupting L139P replacement by selection supports the need for TA  
175 helicity during mitochondrial targeting.

176

177 To further examine whether isolated TA mutations affect mitochondrial OM targeting,  
178 we linked wild-type (WT) or mutant Fis1p TAs to the carboxyl-terminus of mCherry. To  
179 assess mitochondrial localization of these fusion proteins, mitochondria were  
180 specifically labelled with GFP targeted to mitochondria by the presequence of the  
181 Cox4 protein (Sesaki and Jensen 1999). Importantly, the TA of Fis1p lacks information  
182 required for mediating mitochondrial fragmentation (Habib *et al.* 2003), indicating that

183 the localization of these constructs should not be influenced by interaction partners of  
184 full-length, inserted Fis1p.

185

186 The location of mCherry fused to Fis1p TAs was consistent with our genetic findings.  
187 V145E and L139P mutations in the Fis1p TA led to substantial cytosolic and nuclear  
188 accumulation of mCherry (Figure 2B). Moreover, the L129P/V138A TA, consistent with  
189 its weaker activation of Gal4 targets in our selection system, provided still discernable  
190 mitochondrial localization of the mCherry signal, but extraorganellar levels of this  
191 mutant fusion protein appeared to be increased compared to mCherry fused to the WT  
192 TA. These results suggest that our genetic approach is likely to allow recovery of  
193 mutations affecting the ability of the Fis1p TA to moor proteins to the mitochondrial  
194 outer membrane.

195

196 *A deep mutational scan for mutations potentially affecting Fis1p TA targeting*

197

198 Buoyed by our initial isolation of TA mutations affecting Fis1p localization, we decided  
199 to take a more global approach to the analysis of the Fis1p TA. Using degenerate  
200 primers and recombination-based cloning in *S. cerevisiae*, we sought construction of a  
201 library consisting of all possible codons at every one of 27 amino acid positions within  
202 the TA of Gal4-sfGFP-Fis1p. We then allowed the pool of cells containing mutant TAs  
203 to divide four times under six possible culture conditions: no specific selection for *HIS3*  
204 or *URA3* reporter activation (SC-Trp, selecting only for plasmid maintenance), selection  
205 for *HIS3* activation at different 3-AT concentrations (SMM-Trp-His +0, 5, 10, or 20mM  
206 3-AT), or selection for *URA3* activation (SC-Ura). Plasmid DNA was isolated from each  
207 pool of mutants, and TA coding sequences were amplified and subjected to next-  
208 generation sequencing. We focused our subsequent analysis only on clones within our  
209 pools harboring a WT TA sequence or encoding TAs with only a single amino acid  
210 change.

211



212 While all potential replacement mutations could not be detected within our starting  
213 library (Figure S2), and some biases did exist at each TA position, the vast majority of  
214 potential amino acid mutations were represented within our pool. 98.9% of potential  
215 amino acid replacements were identified in the starting pool cultured in SC-Trp, and  
216 95.9% of TAs with single mutations were represented by at least 10 counts.  
217 Quantification of counts from all samples can be found in Table S1. When comparing  
218 the mutant pool cultured in SC-Trp with selection in SMM-Trp-His without added 3-AT,  
219 there was no appreciable difference in the relative abundance of most mutant TAs,  
220 including truncation mutations expected to totally prevent mitochondrial targeting of  
221 Gal4-sfGFP-Fis1p (Figure S3A). Such a result is consistent with 'leaky' expression of  
222 *HIS3* independent of Gal4-driven activation (Durfee *et al.* 1993). However, upon  
223 addition of 3-AT at concentrations of 5mM (Figure S3B), 10mM (Figure S3C), or 20mM  
224 (Figure 3) to medium lacking histidine, there were substantial shifts in the composition  
225 of the mutant pools toward specific amino acids, prompting further experiments that  
226 we describe below. The pool cultured in SC-Ura medium showed very strong selection  
227 for nonsense mutations within the TA (Figure S3D), but less prominent biases among  
228 amino acids. When considering our initial findings, in which recovery of uracil  
229 prototrophs by our genetic scheme led to a high recovery of frameshift and nonsense  
230 mutations, assessment of *HIS3* activation seems more informative regarding  
231 determinants of Fis1p TA targeting than competition assays performed in the more  
232 strongly selective medium lacking uracil. Independently of the primary amino acid  
233 sequence, the specific codons used to direct synthesis of a protein can affect that  
234 polypeptide's translation rate, folding, or even synthesis of its transcript (Yu *et al.* 2015;  
235 Zhou *et al.* 2016). While the data are more 'noisy' due to a lack of representation of  
236 certain codons at each position, codons encoding the same amino acid generally  
237 acted in concert with one another within our selection scheme (Figure S4). Therefore,  
238 our focus remained upon the amino acid sequence of library variants rather than on  
239 codon sequence.

240

241

242 *Proline disruption of Fis1p tail anchor targeting*

243

244 Previous analyses of various tail-anchored mitochondrial proteins similar in general  
245 structure to Fis1p suggested that no primary consensus sequence is required for TA  
246 insertion (Horie *et al.* 2002; Beilharz 2003; Rapaport 2003). While meaningful alignment  
247 of Fis1p TAs across species is difficult due to constraints in amino acid choice within  
248 hydrophobic domains and as a consequence of the apparently variable Fis1p TA length  
249 across species, only G131 (as pertains to the *S. cerevisiae* Fis1p sequence) might be  
250 considered highly conserved (Figure S1B). Our comprehensive analysis supports the  
251 idea that no consensus sequence within the Fis1p TA is necessary to achieve  
252 membrane insertion, since most amino acid replacements within the necessary and  
253 sufficient region required for Fis1p targeting, including at position G131, fail to lead to  
254 notable selectable reporter activation (Figure 3). Consequently, we focused our  
255 subsequent analysis on structural characteristics of the TA that might be most  
256 important for mitochondrial OM targeting.

257

258 The recovery of the L139P mutation during preliminary selection for Fis1p TA mutations  
259 indicated that proline may not be acceptable within the hydrophobic core of the Fis1p  
260 TA. Our deep mutational scan of the Fis1p TA in SMM-Trp-His + 20mM 3-AT (Figure 3)  
261 also strongly indicated that proline insertion across many positions disrupted  
262 mitochondrial TA localization. When focusing specifically upon those mutants that were  
263 in the top 75% most commonly counted variants in the starting pool (>126 counts) and  
264 enriched at least four-fold in SMM-Trp-His + 20mM 3-AT, 12 of 33 missense mutations  
265 within this set were proline replacements (Figure 4), further indicating failure of TA  
266 targeting following placement of proline at many TA positions.

267

268 Subsequently, we carried out directed experiments to further examine poor  
269 accommodation of proline within the Fis1p TA. We further studied the L139P mutant  
270 that was initially isolated during selection for Fis1p TA targeting mutants, and we also  
271 generated four additional, individual proline replacements within Gal4-sfGFP-Fis1p and

272 tested for Gal4-driven reporter activation. Newly constructed V134P, G137P, A140P,  
273 and A144P substitutions, consistent with our larger scale analysis (Figure 3 or Figure  
274 4), provided ample proliferation on medium selective for *HIS3* activation (Figure 5A).  
275 Upon visualization of mCherry fused to these Fis1p TA mutants, V134P, L139P, A140P,  
276 and A144P replacements all clearly diminished mCherry localization to mitochondria  
277 (Figure 5B). Our results suggest that the secondary structure of the Fis1p TA is  
278 important for its function, and that disruption of helicity at many locations may make  
279 targeting to the mitochondrial OM unfavorable. We also noted, however, variability in  
280 the propensity of proline replacements to disrupt Fis1p TA targeting. Most prominently,  
281 the G137P substitution allowed apparently normal targeting to mitochondria, as  
282 assessed by Gal4p-driven reporter activation (Figures 3 and 5A) and by microscopic  
283 analysis (Figure 5B), potentially suggesting the existence of two separable, helical  
284 segments within the Fis1p TA rather than a single, monolithic helix.

285  
286 We considered the possibility that targeting of these mutant TAs is not impeded, but  
287 rather a lack of stability within the lipid bilayer leads to ejection from the mitochondrial  
288 OM by a quality control mechanism. Recently, the yeast Msp1 protein and its human  
289 ortholog ATAD1, have been identified as potential 'extractases' that can remove  
290 improperly folded or mislocalized proteins from the mitochondrial OM (Okreglak and  
291 Walter 2014; Chen *et al.* 2014). We tested whether any of tail-anchored fluorescent  
292 proteins containing proline replacements and not strongly localized to mitochondria  
293 could recover mitochondrial localization in cells deleted of Msp1p. However, deletion  
294 of Msp1p did not lead to relocalization of any tested mutant mCherry-TA fusion protein  
295 to mitochondria (Figure S5A), providing no evidence for proper targeting, then  
296 subsequent removal, of assayed Fis1p TAs harboring proline replacements.

297  
298 In mammalian cells, the ubiquitin protein UBQLN1 can bind to tail-anchored proteins  
299 that fail to target mitochondria, expediting their degradation (Itakura *et al.* 2016). We  
300 wondered whether the yeast UBQLN1 ortholog Dsk2p (Chuang *et al.* 2016) might bind to  
301 mutant Fis1p TAs, sequestering them in the cytosol and preventing mitochondrial

302 insertion. However, deletion of Dsk2p did not change the cellular location of  
303 mislocalized mCherry-TA fusion proteins carrying proline substitutions (Figure S5B).

304

305 *The positively charged carboxyl-terminus of the tail anchor allows both efficient and*  
306 *specific targeting to mitochondria*

307 Analysis of the data from our deep mutational scan suggested that nonsense  
308 mutations throughout much of the TA can allow Gal4-sfGFP-Fis1p to move to the  
309 nucleus and activate transcription (Figures 3, 4, and S3). Stop codons placed within  
310 the highly charged RNKRR pentapeptide near the carboxyl-terminus of Fis1p, however,  
311 seem to permit some membrane localization, as reported by proliferation rates in  
312 selective medium. Therefore, we examined the behavior of a R151X mutant, which  
313 lacks all charged amino acids following the predicted MAD (X represents mutation to a  
314 stop codon). Supporting partial localization to a cellular membrane, the R151X mutant  
315 of Gal4-sfGFP-Fis1p did not activate Gal4-controlled expression of *HIS3* to the same  
316 extent of a Gal4-sfGFP-Fis1p construct lacking the entire TA (Figure 6A). Consistent  
317 with those results, the R151X TA directed mCherry to intracellular organelles (Figure  
318 6B). However, along with some apparent mitochondrial association, the R151X TA was  
319 also clearly localized to the ER (Figure 6C). Interestingly, ER localization of mCherry  
320 fused to the R151X TA was not completely dependent upon Get3p, a receptor for ER  
321 tail-anchored proteins (Schuldiner *et al.* 2008), suggesting the existence of an  
322 alternative pathway for localization of the R151X TA to the ER (Figure S6A and S6B).  
323 Similarly, R151X TA could be targeted to the ER in *get2Δ* mutants, lacking a receptor  
324 for several ER-directed tail-anchored proteins (Figure S6C). However, puncta that  
325 might indicate clustering with Get3p (Schuldiner *et al.* 2008) were apparent in some  
326 *get2Δ* cells, raising the unexplored possibility that Get3p can bind at least some  
327 portion of the cytosolic pool of R151X TA.

328 Together, our results demonstrate that the charged amino acids at the carboxyl-  
329 terminus of the TA provide organelle specificity, yet are not totally required for  
330 membrane localization. These findings are consistent with previous results reporting

331 that positively charged amino acids following the MAD of Fis1p allow targeting of TAs  
332 specifically to mitochondria rather than ER (Isenmann *et al.* 1998; Kuroda *et al.* 1998;  
333 Borgese *et al.* 2001; Stojanovski *et al.* 2004), perhaps by decreasing total TA  
334 hydrophobicity, a factor important for determining the final location of a TA (Beilharz  
335 2003; Wattenberg *et al.* 2007).

336  
337 Since the R151X variant of Gal4-sfGFP-Fis1p activated Gal4-driven reporters, yet was  
338 at least partially localized to the ER, we wondered if ER localization of any protein  
339 fused to Gal4 might similarly lead to Gal4-driven transcription due to the physical  
340 continuity between the ER and nuclear envelope. Therefore, we examined the TA of the  
341 human FIS1 protein (hFIS1), since full-length hFIS1 can localize to ER in *S. cerevisiae*  
342 (Stojanovski *et al.* 2004). Indeed, we found that mCherry fused to the hFIS1 TA was  
343 poorly localized to mitochondria (Figure S7A) and abundant at the ER (Figure S7B).  
344 However, a fusion protein consisting of Gal4 fused to the TA of hFIS1 did not provide  
345 *HIS3* activation (Figure S7C), indicating that the hFIS1 TA is quantitatively membrane-  
346 targeted in *S. cerevisiae* and that activation of Gal4-dependent reporters upon removal  
347 of the positively charged carboxyl-terminus from Gal4-sfGFP-Fis1p is unlikely to be a  
348 consequence of ER localization.

349  
350 Due to the mislocalization of the hFIS1 TA, we then investigated the possibility that  
351 other mitochondrial TA proteins from human would be targeted improperly in *S.*  
352 *cerevisiae*. We fused mCherry to the TA of human BAX, a region that is sufficient for  
353 insertion at the mammalian mitochondrial OM (Schinzel *et al.* 2004). While mCherry  
354 signal was diminished in comparison with other mCherry fusion proteins examined in  
355 this study and expressed under the same promoter, mCherry fused to the BAX TA was  
356 properly targeted to mitochondria (Figure S7D). Gal4 fused to the BAX TA did not  
357 activate selectable reporters (C. Dunn, unpublished results), further indicating effective  
358 mitochondrial targeting mediated by the BAX TA.

359

360 *Extension or reduction of Fis1p TA length does not affect targeting to mitochondria*

361

362 Targeting of tail-anchored proteins to specific membranes has been suggested to  
363 depend, at least in part, upon the specific length of the MAD within the TA (Isenmann  
364 *et al.* 1998; Horie *et al.* 2002). We reasoned that the region within the MAD at which  
365 prolines do not strongly disrupt mitochondrial targeting, as defined by our analysis,  
366 may be amenable to the insertion or deletion of new amino acids, thereby allowing us  
367 to test the relationship between Fis1p TA length and mitochondrial targeting. We  
368 inserted one ( $\nabla 1A$ ), two ( $\nabla 2A$ ), or three ( $\nabla 3A$ ) additional alanines between A135 and  
369 G136 within the TA of Gal4-sfGFP-Fis1p, but none of these mutant constructs led to  
370 apparent *HIS3* (Figure 7A) activation. We then analyzed the location of mCherry fused  
371 to a Fis1p TA carrying these same insertions. All constructs were localized properly to  
372 mitochondria (Figure 7B).

373

374 Next, we deleted one ( $\Delta G136$ ), two ( $\Delta A135-G136$ ), or three ( $\Delta A135-G137$ ) amino acids  
375 within the Fis1p MAD and performed similar assays. Like our insertion mutants,  
376 deletion mutants were apparently targeted to a membrane, as assessed by Gal4-driven  
377 reporter transcription (Figure 7A). Moreover, mCherry remained localized to  
378 mitochondria when up to three amino acids were deleted (Figure 7C).

379

380 Disruption of the ER-localized Spf1 protein reduces the contrast in ergosterol content  
381 between the ER and the mitochondrial OM (Krumpe *et al.* 2012). Consequently, TAs  
382 normally localized to mitochondria are mistargeted to the ER upon Spf1p deletion. The  
383 sterol concentration of membranes can determine bilayer thickness (Dufourc 2008),  
384 raising the possibility that insertions or deletions may allow mitochondrial TAs to once  
385 again prefer mitochondrial OM targeting over ER localization in a background lacking  
386 Spf1p. However, mCherry linked to insertion or deletion mutants of the Fis1p TA  
387 remained poorly targeted to mitochondria (Figure S8A) and prominently localized to the  
388 ER (Figure S8B) in mutants lacking Spf1p.

389

390 Together, our results demonstrate that the Fis1p TA is properly localized to  
391 mitochondria even when its length is substantially altered.

392

393 *Positively charged amino acids are more acceptable than negatively charged amino*  
394 *acids within the predicted transmembrane domain of the Fis1p tail anchor*

395

396 Our deep mutational scan of the Fis1p TA demonstrated that Gal4-sfGFP-Fis1p was  
397 generally able to activate gene expression when aspartate or glutamate was placed  
398 within the MAD (Figure 3). In fact, upon examination of those amino acid replacements  
399 found within the top three quartiles of counts in the initial library and also enriched at  
400 least four-fold upon culture in SMM-Trp-His + 20mM 3-AT, 18 of 33 missense  
401 mutations were aspartate or glutamate substitutions (Figure 4). We were surprised to  
402 find that placement of positively charged arginine or lysine residues appeared to be  
403 much more acceptable within the MAD of Fis1p than aspartate or glutamate; none of  
404 the amino acid substitutions within this high-count, high-enrichment set were by lysine  
405 or arginine.

406

407 To further pursue the possibility that positively charged amino acids can be  
408 accommodated within the Fis1p MAD, we mutated four amino acids within the  
409 hydrophobic stretch of the Fis1p TA to aspartate, glutamate, lysine, or arginine.  
410 Specifically, we generated amino acid replacements at positions V132, A140, A144, or  
411 F148, then retested these mutants under selection for Gal4-sfGFP-Fis1p transcriptional  
412 activity. The results from our global analysis were verified, with aspartate and  
413 glutamate mutations providing stronger reporter activation than lysine and arginine  
414 mutations (Figure 8A). Only the A144D mutation provided sufficient Gal4 activation for  
415 proliferation on medium lacking uracil (Figure S9A) after two days of incubation,  
416 suggesting a very severe TA localization defect caused by this TA mutation. We noted  
417 that these mutant Gal4-sfGFP-Fis1 constructs exhibit altered behavior at different  
418 temperatures. For example, lysine and arginine substitutions at positions A140, A144,  
419 or F148 led to reduced proliferation at 37°C under conditions selective for *HIS3*

420 activation (Figure S9B) when compared to the same TA substitutions assessed at 18°C  
421 (Figure S9C) or 30°C (extended incubation, Figure S9D). This outcome is consistent  
422 with the idea that altered phospholipid dynamics at different temperatures may lead to  
423 consequent changes in TA insertion efficiency (de Mendoza and Cronan 1983).

424

425 We then tested the ability of these Fis1p TAs containing charge substitutions to  
426 promote mitochondrial localization of mCherry. At V132 and F148, positions within the  
427 MAD nearer to the putative water-lipid bilayer interface, mutation to positively charged  
428 amino acids allowed abundant localization to mitochondria (Figure 8B). In contrast,  
429 mutation to negatively charged amino acids clearly hindered mitochondrial targeting.  
430 We noted that F148D and F148E replacements hampered mitochondrial localization  
431 more severely than V132D and V132E replacements, consistent with phenotypic  
432 testing of Gal4-sfGFP-Fis1 fusion proteins. At position A144, lying more deeply within  
433 the predicted MAD, all charge mutations inhibited mCherry targeting, yet A144K and  
434 A144R substitutions allowed some mCherry localization at mitochondria while A144D  
435 and A144E substitutions appeared undetectable at mitochondria. Finally, no  
436 mitochondrial signal was apparent for any of the charge mutants tested at position  
437 A140 of the Fis1p TA. However, A140K and A140R mutants differed from A140D and  
438 A140E mutants by localizing to other membranes within the cell, including the plasma  
439 membrane, rather than providing a diffuse cytosolic signal. Msp1p removal did not  
440 permit relocalization of tail-anchored fluorescent proteins to mitochondria (Figure S5C),  
441 supporting the idea that charge replacements within the Fis1p TA lead to a failure of  
442 association with the OM rather than enhanced removal from mitochondria. Removal of  
443 UBQLN1 ortholog Dsk2p also had no discernable effect on mCherry-TA mutant  
444 localization (Figure S5D).

445

446 Negligible Fis1p activity at mitochondria is apparently sufficient to promote  
447 mitochondrial fission (Habib *et al.* 2003; Krumpe *et al.* 2012), suggesting that even  
448 minimal localization and related functionality at the OM would be detectable by  
449 functional assays. Interestingly, Fis1p variants harboring charged residues, positive or



450 negative, at positions V132, A144, or V148, with the exception of Fis1p carrying the  
451 A144D mutation, provided at least some Fis1p function, as indicated by microscopic  
452 (Figures S10A and S10B) and genetic (Figure S10C) assays. Such a result is consistent  
453 with the finding that only the A144D charge mutant provides sufficient *URA3* activation  
454 for rapid proliferation on medium lacking uracil (Figure S9A).

455

456 Together, our results demonstrate that positively charged amino acids within the MAD  
457 can better promote Fis1p localization than negatively charged amino acids, but that  
458 even negatively charged amino acids can be accommodated within the MAD and lead  
459 to a detectable level of mitochondrial targeting.

460

461 **DISCUSSION:**

462

463 Using a deep mutational scanning approach, we explored structural characteristics of  
464 the Fis1p TA important for targeting to the mitochondrial outer membrane. To our  
465 knowledge, this work is the first application of this technique to the study of a  
466 eukaryotic organelle targeting signal. Deep mutational scanning, when coupled to an  
467 effective method of screening or selection, is very cost- and time-effective (Araya and  
468 Fowler 2011; Fowler and Fields 2014; Boucher *et al.* 2014). Mutant library generation,  
469 subsequent pool selection, and next-generation sequencing can be completed in just a  
470 few months. Consequently, this approach generates far more useful data over a  
471 shorter duration than, for example, alanine scanning mutagenesis or low-throughput  
472 genetic selection followed by Sanger sequencing. Deep mutational scanning has  
473 recently been applied successfully to other areas of study, such as membrane protein  
474 insertion within bacteria (Elazar *et al.* 2016), tumor suppressor structure and function  
475 (Starita *et al.* 2015), and the relationship between a polypeptide's evolutionary path and  
476 its present fitness (Hietpas *et al.* 2011; Melamed *et al.* 2013). As is true for most genetic  
477 screens and selections, further experimentation, as performed here by testing mutant  
478 Fis1p TAs in microscopic and functional assays, is required in order to make full use of  
479 a larger-scale dataset. We also note that some mutations affecting specific insertion of  
480 the Fis1p TA at mitochondria may have been missed during our global analysis:  
481 transcription driven by Gal4-sfGFP-Fis1p indirectly reports on TA targeting and may be  
482 affected by mutant stability, potential sequestration at other intracellular membranes,  
483 or ability of the fusion protein to enter and function within the nucleus.

484

485 *In vivo evidence of the ability of positively charged amino acids to "snorkel" their side*  
486 *chains to surface of the lipid bilayer*

487

488 Because there is a high energetic barrier to placing any charged residue into a lipid  
489 bilayer (Cymer *et al.* 2015), we were initially surprised to find that positively charged  
490 amino acids within the MAD of the Fis1p TA promoted mitochondrial targeting far

491 better than negatively charged amino acids. However, it has been suggested that  
492 lysine and arginine within a MAD can "snorkel," or integrate the uncharged portion of  
493 their side chain into the hydrophobic milieu of the lipid bilayer while locating positive  
494 charges near polar head groups at the interface between the membrane and aqueous  
495 environment (Gavel *et al.* 1988; Segrest *et al.* 1990). Some phospholipid head groups  
496 carry a net negative charge, potentially providing further favorability to snorkeling lysine  
497 and arginine. The shorter hydrophobic portion of aspartate and glutamate, however,  
498 may not permit the side chain to easily reach the membrane interface to remove the  
499 negative charge from the hydrophobic environment, and if they do reach the lipid  
500 bilayer surface, charge repulsion might make such a conformation unfavorable.

501  
502 Most experimental support for amino acid snorkeling has been obtained using *in vitro*  
503 approaches or has been gathered during structural studies (Monné *et al.* 1998; Long *et al.*  
504 *et al.* 2005; Kim *et al.* 2012; Öjemalm *et al.* 2016), and little *in vivo* evidence has been  
505 reported in support of this phenomenon. Our comprehensive study of the Fis1p TA, a  
506 region dedicated only to the process of membrane integration (Habib *et al.* 2003;  
507 Kemper *et al.* 2008), strongly supports the ability of lysine or arginine to be  
508 accommodated by snorkeling at numerous positions within the Fis1p MAD. We note  
509 that snorkeling, if operative for positive charges within the Fis1p TA, may not be  
510 permitted within the context of all mitochondrial TAs: replacement of S184 within the  
511 BAX TA by lysine does not seem to permit mitochondrial localization of this protein  
512 (Nechushtan *et al.* 1999). We also note that while the Fis1p TA is typically modelled as  
513 bitopic, or reaching through the mitochondrial outer membrane from the cytosol to the  
514 intermembrane space, the possibility that the Fis1p TA lies side-long in the outer  
515 membrane has not been ruled out. However, snorkeling is thought to be possible for a  
516 MAD found in either the monotopic or the bitopic configuration (Strandberg and Killian  
517 2003).

518  
519 Further comprehensive mutational scans of MADs may further substantiate the  
520 concept of snorkeling. Interestingly, since those Fis1p TAs mutated to contain

521 positively charged amino acids within the MAD were often not targeted to the OM with  
522 full efficiency, one might imagine a scenario in which dual localization of a protein with  
523 a single MAD to cytosol and to intracellular membranes can be easily evolved by the  
524 appearance of positively charged amino acids at positions previously lacking such  
525 charges. Moreover, some prediction methods for MADs might be considered overly  
526 conservative, especially for prediction programs emphasizing amino acid charge.  
527 Therefore, the accumulating evidence of amino acid snorkeling should prompt the  
528 development of improved algorithms that explicitly consider positively charged amino  
529 acids to be acceptable within certain positions of a predicted MAD.

530

531 *The membrane-associated domain of the Fis1p tail-anchor may consist of two*  
532 *separable segments*

533

534 Computational analyses suggest that the Fis1p TA is mostly alpha-helical in nature  
535 (Buchan *et al.* 2013; Drozdetskiy *et al.* 2015). We found that proper localization of the  
536 Fis1p TA likely requires its predicted alpha-helicity within the MAD, since proline, which  
537 is known to break or kink helices (Senes *et al.* 2004), profoundly disrupts targeting  
538 when substituted at many positions throughout this hydrophobic region. However, we  
539 found that replacement by proline is more acceptable at a specific location, G137, than  
540 proline mutations found at many other locations within this region, potentially indicating  
541 that the Fis1p MAD is bipartite in nature. Further supporting a bipartite structure of the  
542 Fis1p MAD, insertion of new amino acids between A135 and G136 did not apparently  
543 affect mitochondrial TA targeting. Moreover, mutations toward the carboxyl-terminal  
544 end of the Fis1p MAD appear to affect mitochondrial targeting more drastically, as  
545 reported by deep mutational scanning, than mutations toward the amino terminus of  
546 the transmembrane segment. Previous analysis of the rat OMP25 TA also support a  
547 bipartite structure of the MAD, with higher sensitivity to mutation nearer to the  
548 carboxyl-terminal end of this hydrophobic stretch (Horie *et al.* 2002). In addition,  
549 prolines are found within the MAD of the mammalian Omb and OMP25 TAs. These  
550 results suggest that those prolines might demarcate the boundary between distinct

551 structural regions of the targeting sequence. On the other hand, prolines within a single  
552 helical segment may simply be more easily housed within an alpha-helix when buried  
553 deep in the lipid bilayer (Li *et al.* 1996; Senes *et al.* 2004) and may not reflect two  
554 separable MAD segments. If this is the case, prolines found in mitochondrial TAs might  
555 indicate the portion of the TA found at the midpoint of the OM.

556 Glycine is not preferred within alpha-helices (Chou and Fasman 1974; O'Neil and  
557 DeGrado 1990) as a consequence of its conformational flexibility. However, our deep  
558 mutational scan does not indicate reduced membrane targeting when most amino  
559 acids within the Fis1p TA are individually mutated to glycine. This might be surprising  
560 in light of the pronounced effects provided by several proline replacement mutations  
561 throughout this domain. Yet, glycine may not be as disruptive for alpha-helices found  
562 within a lipid bilayer environment when compared with alpha-helices of soluble  
563 proteins, due to better intra-helical hydrogen bonding within the hydrophobic  
564 environment of the membrane (Dong *et al.* 2012). Indeed, four glycines already exist  
565 within the *S. cerevisiae* Fis1p TA, and the TAs of Fis1p orthologs are also littered with  
566 glycines (Stojanovski *et al.* 2004) and (Figure S1B), further indicating that glycines are  
567 less disruptive of the Fis1p TA than prolines. Interestingly, GXXXG motifs, and other  
568 similarly spaced small amino acids like alanine and serine, can promote helix packing  
569 within lipid bilayers (Russ and Engelman 2000; Senes *et al.* 2004; Gimpelev *et al.* 2004).  
570 However, our findings indicate that the sole Fis1p GXXXG motif and a nearby AXXXA  
571 motif do not play a significant role in targeting of the Fis1p TA to membrane.  
572 Furthermore, a GXXXXG motif may mediate multimerization of the mitochondrial OM  
573 protein Bcl-XL (Ospina *et al.* 2011), and such a motif can be found within the *S.*  
574 *cerevisiae* Fis1p and several of its orthologs. However, the GXXXXG motif also seems  
575 to have little to no role in insertion, at least as determined by the ability of Gal4-sfGFP-  
576 Fis1p to activate gene expression.

577

578 *Does a machinery dedicated to mitochondrial tail anchor insertion exist?*

579

580 So far, no cellular machinery dedicated to the insertion of mitochondrial tail anchored  
581 proteins has been revealed. Evidence supporting the existence of such a machinery  
582 includes saturable import of mitochondrial TA-containing proteins in mammalian cells  
583 (Setoguchi *et al.* 2006), potentially indicating a finite number of binding sites for  
584 mitochondrial TAs. Furthermore, the TOM complex has been reported to assist in  
585 insertion of full-length BAX into mitochondria (Ott *et al.* 2007; Cartron *et al.* 2008; Colin  
586 *et al.* 2009). Consistent with the need for a mitochondrial TA translocation machinery,  
587 the hFIS1 TA localizes specifically to mitochondria in human cells (Suzuki *et al.* 2003),  
588 but cannot effectively localize mCherry to *S. cerevisiae* mitochondria, possibly  
589 suggesting evolutionary divergence and a structural mismatch between the hFIS1 TA  
590 and any putative yeast TA translocation apparatus. However, we note that not all  
591 human mitochondrial TAs fail to be imported at the proper organelle in yeast, since our  
592 genetic and microscopic results indicate that the human BAX TA can be targeted to  
593 yeast mitochondria.

594

595 Other, perhaps more abundant evidence supports the idea that mitochondrial tail-  
596 anchored proteins similar in structure to Fis1p do not require a translocation machinery  
597 and can spontaneously insert into the OM. First, the MAD of the TA is protected from  
598 chemical modification upon exposure to lipid vesicles devoid of protein (Kemper *et al.*  
599 2008), suggesting that the Fis1p TA can insert into lipid bilayers without assistance.  
600 Moreover, blockade or destruction of the general insertion pore for mitochondrial  
601 proteins, associated receptors, or other outer membrane protein biogenesis machinery  
602 such as the SAM complex or the MIM complex did not prevent Fis1p insertion at yeast  
603 mitochondria (Stojanovski *et al.* 2007; Kemper *et al.* 2008; Sinzel *et al.* 2016). Tail-  
604 anchored proteins also appear to have the ability to spontaneously and rapidly insert  
605 into mammalian mitochondria without the need for the TOM complex or soluble  
606 cytosolic chaperones (Setoguchi *et al.* 2006), although cytosolic chaperones potentially  
607 play a role in maintaining solubility of tail-anchored proteins while they are *en route* to

608 mitochondria (Itakura *et al.* 2016). Further supporting the absence of a translocation  
609 machinery dedicated to TA insertion, a large-scale screen for proteins required for  
610 proper localization of mitochondrial tail-anchored proteins uncovered no putative  
611 translocon components (Krumpe *et al.* 2012). We note that Fis1p is also localized to  
612 peroxisomes (Kuravi *et al.* 2006), suggesting that any machinery that allows Fis1p TA  
613 insertion would potentially be shared by both mitochondria and peroxisomes.  
614 However, no dual-localized translocation machinery has yet been identified.

615

616 While a fraction of Fis1p can be targeted to the peroxisome, we found that detection of  
617 mutant Fis1p TAs in the cytosol and nucleus by microscopic and genetic assays is not  
618 driven by a specific failure of peroxisomal insertion. mCherry fused to the wild-type  
619 Fis1p TA is not evident in the cytosol or nucleus upon severe disruption of peroxisomal  
620 biogenesis (Hettema *et al.* 2000) by deletion of the peroxisomal membrane protein  
621 import components Pex3p (Figure S11A) or Pex19p (C. Dunn, unpublished  
622 observations). Moreover, reporter activation by Gal4-sfGFP-Fis1p containing an  
623 unmutated TA is not increased when *PEX3* is removed (Figure S11B), and the relative  
624 level of Gal4p-driven reporter activation among proline substitution mutants (Figure  
625 S11C) or charge substitution mutants (Figure S11D) did not differ between *PEX3* and  
626 *pex3Δ* cells.

627

628 If a TA insertion machinery does exist at the mitochondrial OM, loss-of-function  
629 mutations affecting this machinery would presumably be recovered by the application  
630 of our genetic selection scheme. Moreover, we expect that refined analysis of other  
631 organelle targeting signals and membrane insertion sequences will be accomplished  
632 by applying the deep mutational scanning approach outlined in this study.

633

634 **MATERIALS AND METHODS:**

635

636 *Yeast strains and plasmids*

637

638 Details of strains used in this study are provided in Table S2. Plasmid acquisition  
639 details and associated references, as well as details of plasmid construction, are found  
640 in Table S3. Oligonucleotides used in this study are listed in Table S4.

641

642 *Culture conditions*

643

644 Synthetic complete (SC) medium contains 0.67% yeast nitrogen base without amino  
645 acids, 2% dextrose, 0.1% casamino acids, 50 µg/ml adenine hemisulfate, and either  
646 25 µg/ml uracil (SC-Trp) or 100 µg/ml L-tryptophan (SC-Ura). Supplemented minimal  
647 medium (SMM) contains 0.67% yeast nitrogen base without amino acids, 2% dextrose,  
648 20 µg/ml adenine hemisulfate, 20 µg/ml uracil, 20 µg/ml methionine, 30 µg/ml lysine.  
649 SMM also contains, depending on selection needs, 20 µg/ml histidine, 100 µg/ml  
650 leucine, and/or 20 µg/ml tryptophan, as indicated. SLac medium lacking histidine  
651 contains 0.67% yeast nitrogen base without amino acids, 1.2% NaOH, a volume of  
652 lactic acid sufficient to subsequently bring the pH to 5.5, 20 µg/ml adenine hemisulfate,  
653 20 µg/ml uracil, 20 µg/ml methionine, 30 µg/ml lysine, 100 µg/ml leucine, and 20 µg/ml  
654 tryptophan. Solid media also contain 1.7% bacteriological agar. Cells were incubated  
655 at 30°C unless otherwise indicated. For serial dilution assays, strains in logarithmic  
656 proliferation phase were diluted to an OD<sub>600</sub> of 0.1, and 4 µL of this dilution and three  
657 serial five-fold dilutions were spotted to solid medium. Experiments have been carried  
658 out at 30°C unless otherwise noted.

659

660 *Fis1p TA mutant library construction*

661

662 Recombination-based cloning (Oldenburg *et al.* 1997) was used to generate constructs  
663 expressing Gal4-sfGFP-Fis1p under control of the *FIS1* promoter and mutated at one



664 of 27 positions within the Fis1p TA. Two DNA segments generated by PCR were fused  
665 in this recombination reaction. The 5' portion was amplified by PCR from template  
666 plasmid b100 using primer 698 and the appropriate primer (rvsposX) listed in Table S4.  
667 The 3' section was generated from template b100 using primers 517 and the relevant  
668 primer (fwdposX) listed in the same table. PCR products were recombined into *NotI*-  
669 linearized pKS1 by co-transformation of vector and PCR products into strain MaV203.  
670 The sub-library for each Fis1p TA position was generated individually by selection of  
671 Trp<sup>+</sup> clones in liquid medium, with a portion of each transformation reaction plated to  
672 solid SC-Trp medium to confirm recombination and transformation efficiency. To  
673 generate the total pool prior to selection for Gal4p-mediated transcription, equal  
674 numbers of cells, as determined by OD<sub>600</sub> measurement, were taken from overnight  
675 cultures of each sub-library and combined within the same liquid culture.

676

#### 677 *Deep mutational scanning of the Fis1p TA library*

678

679 The pool of constructs containing Fis1p TA mutations was cultured for four generations  
680 in SC-Trp medium, SC-Ura medium, or SMM-Trp-His medium containing 0 mM, 5 mM,  
681 10 mM, or 20 mM 3-AT. Plasmids present under each culture condition were then  
682 recovered from 10 OD<sub>600</sub> units of cells. To harvest each plasmid library, cells were  
683 pelleted at 4,000 g for 3 min, then washed with 5 ml 0.9 M D-sorbitol and resuspended  
684 in 1 ml of 0.9 M D-sorbitol. One "stick-full" of zymolyase 20T (Amsbio, Abingdon,  
685 United Kingdom), was added, and cells were incubated at 37°C for 45 min. Cells were  
686 again collected at 4,000 g for 3 min and processed using a plasmid purification kit  
687 (GeneJET Plasmid Miniprep Kit, Thermo Scientific, Waltham, USA) according to the  
688 manufacturer's instructions. Primers 882 and 883 were used to amplify the genomic  
689 region encoding the Fis1p TA from each plasmid pool. Using the provided PCR  
690 products, next-generation, paired-end sequencing was performed by Microsynth  
691 (Balgach, Switzerland) on a MiSeq Nano (2x150v2). The resulting FASTQ output can be  
692 found at [\[to be uploaded to Dryad Digital Repository and link provided - upload](#)  
693 [requires manuscript acceptance. Data are also available upon reviewer request\]](#).

694 FASTQ output from paired ends, stripped of adaptor sequences, was combined into a  
695 single segment using the PANDAseq assembler version 2.8 (Masella *et al.* 2012). The  
696 TRIM function (trimmer Galaxy tool version 0.0.1) was performed using the resources  
697 of the Galaxy Project (Goecks *et al.* 2010) in order to remove sequences not directly  
698 encoding the defined Fis1p and stop codon. Further processing in Microsoft Excel  
699 (Redmond, USA) subsequently allowed conversion of DNA sequence to amino acid  
700 sequence and removal of those TAs with more than one amino acid alteration from  
701 further analysis. Enrichment values reflect, at a given amino acid position, the ratio of  
702 the fraction of amino acid counts following selection to the fraction of amino acid  
703 counts in the starting library. Enrichment values are not derived through comparisons  
704 across different amino acid positions. Counts for the native amino acid at each position  
705 were set as the total number of TA counts for which all amino acids were WT within a  
706 given selected pool. When calculating enrichment values, TA amino acid replacements  
707 for which there were zero reads in the SC-Trp sample had their value changed to one  
708 in order to allow possible detection of enrichment under selective conditions by  
709 preventing division by zero. Heat maps were generated using the Matrix2png utility  
710 (Pavlidis and Noble 2003).

711

## 712 *Microscopy*

713

714 For epifluorescence microscopy, cells in the logarithmic phase of culture proliferation  
715 were examined using an Eclipse 80i microscope with a 100X Plan Fluor objective and  
716 linked to a DS-Qi1Mc camera (Nikon, Tokyo, Japan). Cells were cultured in SMM  
717 medium appropriate for plasmid selection. Exposure times were automatically  
718 determined, and images were captured using NIS-Elements version AR 3.2. mCherry  
719 fusions are driven by the *ADH1* promoter and universally contain Fis1p amino acids  
720 119-128 linking mCherry to the Fis1p TA, the region of Fis1p that is necessary and  
721 sufficient for mitochondrial insertion (Mozdy *et al.* 2000; Beilharz 2003; Kemper *et al.*  
722 2008; Förtsch *et al.* 2011) or to alternative TAs. All images of mCherry expression were  
723 brightness adjusted in Adobe Photoshop CS5 (Adobe, San Jose, California) to an

724 equivalent extent, except when the mCherry-BAX(TA) signal was assessed. For  
725 presentation of data associated with that specific fusion protein, the 'autolevels'  
726 adjustment was used. Scoring of mitochondrial morphology was performed blind to  
727 genotype. To promote Fis1p-dependent mitochondrial fragmentation, sodium azide  
728 was added at a concentration of 500  $\mu$ M for 60 min before fluorescence microscopy  
729 (Fekkes *et al.* 2000; Klecker *et al.* 2015).

730

### 731 *Genetic assessment of Fis1p functionality*

732

733 Cells lose mtDNA and the ability to proliferate on non-fermentable medium when  
734 mitochondrial fusion is blocked unless mitochondria division is also abrogated (Sesaki  
735 and Jensen 1999; Fekkes *et al.* 2000; Mozdy *et al.* 2000; Tieu and Nunnari 2000).  
736 Strain CDD688 (Mutlu *et al.* 2014) harbors chromosomal deletions in *FZO1* and *FIS1*  
737 and a CHX-counterselectable plasmid expressing *FZO1*. Upon removal of plasmid-  
738 expressed *FZO1*, cells will maintain mtDNA and respire unless functional *FIS1* is also  
739 present to allow mitochondrial division. To assess the functionality of Fis1p variants  
740 containing TA mutations, strain CDD688 was transformed with plasmids expressing  
741 WT *FIS1* or variants mutated within the Fis1p TA. Transformants were cultured  
742 overnight in SMM-His medium lacking CHX to permit cells to lose the *FZO1*-encoding  
743 plasmid. Serial dilutions were then spotted to SLac-His + 3  $\mu$ g/mL CHX ("lactate / no  
744 fusion") and incubated for 5 d to test for maintenance of mtDNA following  
745 counterselection for *FZO1*, with cell proliferation indicating a lack of Fis1p function. As  
746 a control for cell proliferation under conditions not selective for mtDNA maintenance,  
747 an equal number of cells was also spotted to SMM-Trp-His medium ("glucose /  
748 fusion") and incubated for 2 d.

749

750 **ACKNOWLEDGEMENTS:**

751

752 We thank Gülayşe İnce Dunn, Bengisu Seferoğlu, Güleycan Bal, Funda Kar, and Sara  
753 Nafisi for comments on this manuscript. This work was supported by a European  
754 Molecular Biology Organization Installation Grant (2138) to CDD, a European Research  
755 Council Starting Grant (637649-RevMito) to CDD, and by Koç University.

756

757 **CONFLICT OF INTEREST STATEMENT:**

758

759 The authors have no known conflict of interest affecting the outcome or interpretation  
760 of this study.

761

762 **FIGURE LEGENDS:**

763

764 **Figure 1.** A genetic selection based on protein mislocalization allows recovery of  
765 mutations blocking Fis1p TA localization to mitochondria. (A) A scheme for selection of  
766 mutations preventing mitochondrial targeting of the Fis1p TA. Full-length Fis1p is fused  
767 to the transcription factor Gal4p. Upon failure of Fis1p to be localized to the  
768 mitochondrial OM, Gal4p may be free to translocate to the nucleus and activate the  
769 selectable markers *HIS3* and *URA3*. (B) A Gal4-sfGFP-Fis1 fusion localizes to  
770 mitochondria. Strain CDD898 was transformed with plasmid b102, which  
771 overexpresses the Gal4-sfGFP-Fis1p construct used in this study. Mitochondria were  
772 visualized using mCherry fused to the Cox4 presequence expressed from plasmid  
773 pHS12-mCherry. Scale bar, 5  $\mu$ m. (C) Removal of the Fis1p TA allows proliferation on  
774 medium requiring *HIS3* activation or *URA3* activation. Strain MaV203 expressing Gal4-  
775 sfGFP-Fis1p from plasmid b100 (WT TA), a variant lacking the Fis1p TA from plasmid  
776 b101 ( $\Delta$ TA), or harboring empty vector pKS1 was cultured in SC-Trp medium, then,  
777 following serial dilution, spotted to SC-Trp, SMM-His + 20 mM 3-AT, or SC-Ura and  
778 incubated for 2 d.

779

780 **Figure 2.** Selection for reporter activation by Gal4-sfGFP-Fis1p reveals TA mutations  
781 inhibiting mitochondrial localization. (A) Missense mutations within the Fis1p TA  
782 provide selectable marker activation. Strain MaV203 expressing Gal4-sfGFP-Fis1p  
783 from plasmid b100 or variants expressed from plasmids b128 (V145E), b129 (L139P),  
784 b130 (L129P, V138A), or b101 ( $\Delta$ TA) were treated as in Figure 1C. pKS1 (vector) is also  
785 provided as a negative control. (B) Missense mutations within the Fis1p TA allow  
786 cytosolic and nuclear accumulation of a linked mCherry protein. mCherry fused to  
787 variants of the Fis1p TA were expressed in WT strain CDD961 from plasmids b109  
788 (WT), b134 (V145E), b135 (L139P), b136 (L129P,V138A), or b252 ( $\Delta$ TA) and visualized  
789 by fluorescence microscopy. Mitochondria were labelled with a mitochondria-targeted  
790 GFP expressed from plasmid pHS1. Scale bar, 5  $\mu$ m.

791

792 **Figure 3.** Global discovery of mutations within the TA of a Gal4-sfGFP-Fis1 fusion  
793 protein that allow Gal4-driven transcription. The  $\log_2$  of enrichment values for each  
794 amino acid were calculated for each position following selection in SMM-Trp-His  
795 medium containing 20 mM 3-AT. Enrichment values are generated for individual amino  
796 acid positions within the TA, and not across positions. Black outlines denote the native  
797 amino acid for each position. Amino acid replacements not detectable under selective  
798 conditions are denoted by black, filled squares. The predicted MAD is indicated by a  
799 red line. 'X' represents substitution by a stop codon.

800

801 **Figure 4.** Identification of abundant Gal4-sfGFP-Fis1p clones which are highly  
802 enriched upon selection for Gal4-sfGFP-Fis1p nuclear translocation. (A) TA substitution  
803 mutations are plotted, with  $\log_2$  enrichment values provided on the X-axis and  
804 sequence counts recovered from the starting pool (SC-Trp) provided on the Y-axis.  
805 Those replacement mutations that are within the top 75th percentile of mutant  
806 abundance in the starting pool and enriched at least four-fold following selection in  
807 SMM-Trp-His medium containing 20 mM 3-AT are highlighted in a blue box. (B)  
808 Expansion of the highlighted region in (A) showing specific TA mutations.

809

810 **Figure 5.** Proline substitution is acceptable at a discrete position within the Fis1p TA.  
811 (A) Replacement of specific amino acids within the TA of Gal4-sfGFP-Fis1p with proline  
812 can lead to Gal4-mediated selectable marker activation. Strain MaV203 expressing  
813 Gal4-sfGFP-Fis1p variants from plasmids b100 (WT), b188 (V134P), b189 (G137P),  
814 b129 (L139P), b190 (A140P), b296 (A144P), or b101 ( $\Delta$ TA) was cultured in SC-Trp  
815 medium then spotted to SC-Trp or SMM-His + 20 mM 3-AT medium for 2 d. (B) TAs  
816 with specific proline replacements can reduce mitochondrial targeting of a linked  
817 fluorescent protein. Variants of the Fis1p TA fused to mCherry were expressed in WT  
818 strain CDD961 from plasmids b109 (WT), b208 (V134P), b209 (G137P), b135 (L139P),  
819 b210 (A140P), b211 (A144P) and examined, along with mitochondria-targeted GFP, as  
820 in Figure 2B. Scale bar, 5  $\mu$ m.

821

822

823 **Figure 6.** The positively charged carboxyl-terminus of the Fis1p TA is important for  
824 specific localization to and insertion at the mitochondrial outer membrane. (A) Deletion  
825 of the final five amino acids from the Fis1p TA permits transcriptional activation by  
826 Gal4-sfGFP-Fis1p. Strain MaV203 harboring plasmids b100 (WT), b253 (R151X), or  
827 b101 ( $\Delta$ TA) was treated as in Figure 5A. (B) Removal of the last five amino acids from  
828 the Fis1p TA allows mislocalization to the secretory system. Strain CDD961 expressing  
829 mCherry fused to the WT Fis1p TA from plasmid b109 or expressing mCherry linked to  
830 a truncated Fis1p TA (R151X) from plasmid b254 was evaluated as in Figure 2B. (C)  
831 Strain CDD961 was cured of plasmid pHS1. The resulting strain was transformed with  
832 plasmid pJK59 to label ER by expression of Sec63p-GFP, then transformed with either  
833 plasmid b109 or plasmid b254 to localize the WT and R151X TAs and examined by  
834 fluorescence microscopy. Scale bar, 5  $\mu$ m.

835

836 **Figure 7.** Targeting of the Fis1p TA is not dependent upon a specific TA length. (A)  
837 Deletion of up to three amino acids or insertion of up to three amino acids does not  
838 allow Gal4-sfGFP-Fis1p to activate transcription. MaV203 cells expressing Gal4-  
839 sfGFP-Fis1p variants from plasmids b229 ( $\nabla$ 1A), b230 ( $\nabla$ 2A), b231 ( $\nabla$ 3A), b226 ( $\Delta$ G136),  
840 b227 ( $\Delta$ A135-G136), b228 ( $\Delta$ A135-G137), or b101 ( $\Delta$ TA) were treated as in Figure 5A.  
841 (B) mCherry fused to a Fis1p TA containing an insertion of up to three amino acids in  
842 length localizes properly to mitochondria. Strain CDD961 expressing mCherry-TA  
843 fusions from plasmids b109 (WT), b235 ( $\nabla$ 1A), b236 ( $\nabla$ 2A), or b237 ( $\nabla$ 3A) was visualized  
844 as in Figure 2B. (C) mCherry fused to a Fis1p TA deleted of up to three amino acids is  
845 properly targeted to mitochondria. Strain CDD961 expressing mCherry-TA fusions from  
846 plasmids b109 (WT), b232 ( $\Delta$ G136), b233 ( $\Delta$ A135-G136), or b234 ( $\Delta$ A135-G137) was  
847 examined as in Figure 2B. Scale bar, 5  $\mu$ m.

848

849 **Figure 8.** Fis1p TA targeting is hindered to a greater extent by inclusion of negatively  
850 charged amino acids in the MAD than by positively charged amino acids. (A) Negative  
851 charges allow higher transcriptional activity than positive charges when placed at

852 specific positions within the Gal4-sfGFP-Fis1p TA. Strain MaV203 was transformed  
853 with plasmids pKS1 (vector), b100 (Gal4-sfGFP-Fis1), b101 [Gal4-sfGFP-Fis1( $\Delta$ TA)], or  
854 plasmids encoding the indicated charge replacements within the Fis1p TA (plasmids  
855 b173-b187 and b295). The resulting transformants were spotted to SC-Trp medium (1  
856 d, 30°C) or SMM-His + 20mM 3-AT medium (2 d, 30°C). (B) mCherry-TA localization is  
857 disrupted more severely by negatively charged amino acids within the MAD than by  
858 positively charged amino acids. Strain CDD961 was transformed with plasmids (b192-  
859 b207) expressing mCherry linked to Fis1p TAs harboring the indicated substitutions.  
860 Cells were visualized as in Figure 2B. Scale bar, 5  $\mu$ m.



861 **REFERENCES:**

- 862 Akdoğan E., Tardu M., Garipler G., Baytek G., Kavaklı İ. H., Dunn C. D., 2016 Reduced  
863 Glucose Sensation Can Increase the Fitness of *Saccharomyces cerevisiae* Lacking  
864 Mitochondrial DNA (M Polymenis, Ed.). *PLoS ONE* **11**: e0146511–32.
- 865 Araya C. L., Fowler D. M., 2011 Deep mutational scanning: assessing protein function  
866 on a massive scale. *Trends in Biotechnology* **29**: 435–442.
- 867 Beilharz T., 2003 Bipartite Signals Mediate Subcellular Targeting of Tail-anchored  
868 Membrane Proteins in *Saccharomyces cerevisiae*. **278**: 8219–8223.
- 869 Borgese N., Fasana E., 2011 Targeting pathways of C-tail-anchored proteins. *BBA -*  
870 *Biomembranes* **1808**: 937–946.
- 871 Borgese N., Brambillasca S., Colombo S., 2007 How tails guide tail-anchored proteins  
872 to their destinations. *Current opinion in cell biology* **19**: 368–375.
- 873 Borgese N., Gazzoni I., Barberi M., Colombo S., Pedrazzini E., 2001 Targeting of a tail-  
874 anchored protein to endoplasmic reticulum and mitochondrial outer membrane by  
875 independent but competing pathways. *Mol Biol Cell* **12**: 2482–2496.
- 876 Boucher J. I., Cote P., Flynn J., Jiang L., Laban A., Mishra P., Roscoe B. P., Bolon D.  
877 N. A., 2014 Viewing protein fitness landscapes through a next-gen lens. *Genetics*  
878 **198**: 461–471.
- 879 Buchan D. W. A., Minneci F., Nugent T. C. O., Bryson K., Jones D. T., 2013 Scalable  
880 web services for the PSIPRED Protein Analysis Workbench. *Nucleic Acids Res* **41**:  
881 W349–57.
- 882 Cartron P.-F., Bellot G., Oliver L., Grandier-Vazeille X., Manon S., Vallette F. M., 2008  
883 Bax inserts into the mitochondrial outer membrane by different mechanisms. *FEBS*  
884 *Lett* **582**: 3045–3051.
- 885 Chen Y.-C., Umanah G. K. E., Dephore N., Andrabi S. A., Gygi S. P., Dawson T. M.,  
886 Dawson V. L., Rutter J., 2014 Msp1/ATAD1 maintains mitochondrial function by  
887 facilitating the degradation of mislocalized tail-anchored proteins. *EMBO J* **33**:  
888 1548–1564.
- 889 Chou P. Y., Fasman G. D., 1974 Conformational parameters for amino acids in helical,  
890 beta-sheet, and random coil regions calculated from proteins. *Biochemistry* **13**:  
891 211–222.
- 892 Chuang K.-H., Liang F., Higgins R., Wang Y., 2016 Ubiquilin/Dsk2 promotes inclusion  
893 body formation and vacuole (lysosome)-mediated disposal of mutated huntingtin.  
894 *Mol Biol Cell* **27**: 2025–2036.

- 895 Colin J., Garibal J., Mignotte B., Guenal I., 2009 The mitochondrial TOM complex  
896 modulates bax-induced apoptosis in *Drosophila*. *Biochemical and Biophysical*  
897 *Research Communications* **379**: 939–943.
- 898 Cymer F., Heijne von G., White S. H., 2015 Mechanisms of Integral Membrane Protein  
899 Insertion and Folding. *J Mol Biol* **427**: 999–1022.
- 900 de Mendoza D., Cronan J. E. Jr., 1983 Thermal regulation of membrane lipid fluidity in  
901 bacteria. *Trends in Biochemical Sciences* **8**: 49–52.
- 902 Denic V., Dötsch V., Sinning I., 2013 Endoplasmic reticulum targeting and insertion of  
903 tail-anchored membrane proteins by the GET pathway. *Cold Spring Harbor*  
904 *Perspectives in Biology* **5**: a013334–a013334.
- 905 Deshaies R. J., Schekman R., 1987 A yeast mutant defective at an early stage in import  
906 of secretory protein precursors into the endoplasmic reticulum. *J Cell Biol* **105**:  
907 633–645.
- 908 Dong H., Sharma M., Zhou H.-X., Cross T. A., 2012 Glycines: Role in  $\alpha$ -Helical  
909 Membrane Protein Structures and a Potential Indicator of Native Conformation.  
910 *Biochemistry* **51**: 4779–4789.
- 911 Drozdetskiy A., Cole C., Procter J., Barton G. J., 2015 JPred4: a protein secondary  
912 structure prediction server. *Nucleic Acids Res* **43**: W389–94.
- 913 Dufourc E. J., 2008 Sterols and membrane dynamics. *J Chem Biol* **1**: 63–77.
- 914 Dunn C. D., Jensen R. E., 2003 Suppression of a defect in mitochondrial protein import  
915 identifies cytosolic proteins required for viability of yeast cells lacking mitochondrial  
916 DNA. *Genetics* **165**: 35–45.
- 917 Durfee T., Becherer K., Chen P. L., Yeh S. H., Yang Y., Kilburn A. E., Lee W. H., Elledge  
918 S. J., 1993 The retinoblastoma protein associates with the protein phosphatase  
919 type 1 catalytic subunit. *Genes Dev* **7**: 555–569.
- 920 Elazar A., Weinstein J., Biran I., Fridman Y., Bibi E., Fleishman S. J., 2016 Mutational  
921 scanning reveals the determinants of protein insertion and association energetics in  
922 the plasma membrane. *eLife* **5**: 1302.
- 923 Fekkes P., Shepard K. A., Yaffe M. P., 2000 Gag3p, an outer membrane protein  
924 required for fission of mitochondrial tubules. *J Cell Biol* **151**: 333–340.
- 925 Fowler D. M., Fields S., 2014 Deep mutational scanning: a new style of protein science.  
926 *Nature Publishing Group* **11**: 801–807.
- 927 Förtsch J., Hummel E., Krist M., Westermann B., 2011 The myosin-related motor  
928 protein Myo2 is an essential mediator of bud-directed mitochondrial movement in

- 929 yeast. *J Cell Biol* **194**: 473–488.
- 930 Garipler G., Mutlu N., Lack N. A., Dunn C. D., 2014 Deletion of conserved protein  
931 phosphatases reverses defects associated with mitochondrial DNA damage in  
932 *Saccharomyces cerevisiae*. *Proceedings of the National Academy of Sciences* **111**:  
933 1473–1478.
- 934 Gavel Y., Nilsson L., Heijne von G., 1988 Mitochondrial targeting sequences. Why  
935 “non-amphiphilic” peptides may still be amphiphilic. *FEBS Lett* **235**: 173–177.
- 936 Gimpelev M., Forrest L. R., Murray D., Honig B., 2004 Helical Packing Patterns in  
937 Membrane and Soluble Proteins. *Biophysical Journal* **87**: 4075–4086.
- 938 Goecks J., Nekrutenko A., Taylor J., Galaxy Team, 2010 Galaxy: a comprehensive  
939 approach for supporting accessible, reproducible, and transparent computational  
940 research in the life sciences. *Genome Biol* **11**: R86.
- 941 Gross A., Pilcher K., Blachly-Dyson E., Basso E., Jockel J., Bassik M. C., Korsmeyer S.  
942 J., Forte M., 2000 Biochemical and Genetic Analysis of the Mitochondrial Response  
943 of Yeast to BAX and BCL-XL. *Mol Cell Biol* **20**: 3125–3136.
- 944 Habib S. J., Vasiljev A., Neupert W., Rapaport D., 2003 Multiple functions of tail-anchor  
945 domains of mitochondrial outer membrane proteins. *FEBS Lett* **555**: 511–515.
- 946 He S., Fox T. D., 1999 Mutations affecting a yeast mitochondrial inner membrane  
947 protein, pnt1p, block export of a mitochondrially synthesized fusion protein from  
948 the matrix. *Mol Cell Biol* **19**: 6598–6607.
- 949 Hettema E. H., Girzalsky W., Van den Berg M., Erdmann R., Distel B., 2000  
950 *Saccharomyces cerevisiae* pex3p and pex19p are required for proper localization  
951 and stability of peroxisomal membrane proteins. *EMBO J* **19**: 223–233.
- 952 Hietpas R. T., Jensen J. D., Bolon D. N. A., 2011 Experimental illumination of a fitness  
953 landscape. *Proceedings of the National Academy of Sciences* **108**: 7896–7901.
- 954 Horie C., Suzuki H., Sakaguchi M., Mihara K., 2002 Characterization of signal that  
955 directs C-tail-anchored proteins to mammalian mitochondrial outer membrane. *Mol*  
956 *Biol Cell* **13**: 1615–1625.
- 957 Isenmann S., Khew-Goodall Y., Gamble J., Vadas M., Wattenberg B. W., 1998 A  
958 splice-isoform of vesicle-associated membrane protein-1 (VAMP-1) contains a  
959 mitochondrial targeting signal. *Mol Biol Cell* **9**: 1649–1660.
- 960 Itakura E., Zavodszky E., Shao S., Wohlever M. L., Keenan R. J., Hegde R. S., 2016  
961 Ubiquilins Chaperone and Triage Mitochondrial Membrane Proteins for  
962 Degradation. *Molecular Cell*: 1–14.

- 963 Jensen R. E., Schmidt S., Mark R. J., 1992 Mutations in a 19-amino-acid hydrophobic  
964 region of the yeast cytochrome c1 presequence prevent sorting to the  
965 mitochondrial intermembrane space. *Mol Cell Biol* **12**: 4677–4686.
- 966 Johnson N., Powis K., High S., 2013 Post-translational translocation into the  
967 endoplasmic reticulum. *BBA-Molecular Cell Research* **1833**: 2403–2409.
- 968 Kemper C., Habib S. J., Engl G., Heckmeyer P., Dimmer K. S., Rapaport D., 2008  
969 Integration of tail-anchored proteins into the mitochondrial outer membrane does  
970 not require any known import components. *Journal of Cell Science* **121**: 1990–  
971 1998.
- 972 Kim C., Schmidt T., Cho E.-G., Ye F., Ulmer T. S., Ginsberg M. H., 2012 Basic amino-  
973 acid side chains regulate transmembrane integrin signalling. *Nature* **481**: 209–213.
- 974 Klecker T., Wemmer M., Haag M., Weig A., Böckler S., Langer T., Nunnari J.,  
975 Westermann B., 2015 Interaction of MDM33 with mitochondrial inner membrane  
976 homeostasis pathways in yeast. *Sci. Rep.*: 1–14.
- 977 Krogh A., Larsson B., Heijne von G., Sonnhammer E. L. L., 2001 Predicting  
978 transmembrane protein topology with a hidden markov model: application to  
979 complete genomes<sup>11</sup> Edited by F. Cohen. *J Mol Biol* **305**: 567–580.
- 980 Krumpke K., Frumkin I., Herzig Y., Rimon N., Özbalci C., Brügger B., Rapaport D.,  
981 Schuldiner M., 2012 Ergosterol content specifies targeting of tail-anchored proteins  
982 to mitochondrial outer membranes. *Mol Biol Cell* **23**: 3927–3935.
- 983 Kuravi K., Nagotu S., Krikken A. M., Sjollem K., Deckers M., Erdmann R., Veenhuis  
984 M., van der Klei I. J., 2006 Dynammin-related proteins Vps1p and Dnm1p control  
985 peroxisome abundance in *Saccharomyces cerevisiae*. *Journal of Cell Science* **119**:  
986 3994–4001.
- 987 Kuroda R., Ikenoue T., Honsho M., Tsujimoto S., Mitoma J. Y., Ito A., 1998 Charged  
988 amino acids at the carboxyl-terminal portions determine the intracellular locations  
989 of two isoforms of cytochrome b5. *J Biol Chem* **273**: 31097–31102.
- 990 Lee J., Kim D. H., Hwang I., 2014 Specific targeting of proteins to outer envelope  
991 membranes of endosymbiotic organelles, chloroplasts, and mitochondria. *Front*  
992 *Plant Sci* **5**: 173.
- 993 Lee S., Lim W. A., Thorn K. S., 2013 Improved blue, green, and red fluorescent protein  
994 tagging vectors for *S. cerevisiae*. (AS Gladfelter, Ed.). *PLoS ONE* **8**: e67902.
- 995 Li S. C., Goto N. K., Williams K. A., Deber C. M., 1996 Alpha-helical, but not beta-  
996 sheet, propensity of proline is determined by peptide environment. *Proc Natl Acad*  
997 *Sci USA* **93**: 6676–6681.

- 998 Long S. B., Campbell E. B., MacKinnon R., 2005 Voltage Sensor of Kv1.2: Structural  
999 Basis of Electromechanical Coupling. *Science* **309**: 903–908.
- 1000 Maarse A. C., Blom J., Grivell L. A., Meijer M., 1992 MPI1, an essential gene encoding  
1001 a mitochondrial membrane protein, is possibly involved in protein import into yeast  
1002 mitochondria. *EMBO J* **11**: 3619–3628.
- 1003 Masella A. P., Bartram A. K., Truszkowski J. M., Brown D. G., Neufeld J. D., 2012  
1004 PANDAsq: paired-end assembler for illumina sequences. *BMC Bioinformatics* **13**:  
1005 31.
- 1006 Melamed D., Young D. L., Gamble C. E., Miller C. R., Fields S., 2013 Deep mutational  
1007 scanning of an RRM domain of the *Saccharomyces cerevisiae* poly(A)-binding  
1008 protein. *RNA* **19**: 1537–1551.
- 1009 Monné M., Nilsson I., Johansson M., Elmhed N., Heijne von G., 1998 Positively and  
1010 negatively charged residues have different effects on the position in the membrane  
1011 of a model transmembrane helix. *J Mol Biol* **284**: 1177–1183.
- 1012 Mozdy A. D., McCaffery J. M., Shaw J. M., 2000 Dnm1p GTPase-mediated  
1013 mitochondrial fission is a multi-step process requiring the novel integral membrane  
1014 component Fis1p. *J Cell Biol* **151**: 367–380.
- 1015 Mutlu N., Garipler G., Akdoğan E., Dunn C. D., 2014 Activation of the pleiotropic drug  
1016 resistance pathway can promote mitochondrial DNA retention by fusion-defective  
1017 mitochondria in *Saccharomyces cerevisiae*. *G3 (Bethesda)* **4**: 1247–1258.
- 1018 Nechushtan A., Smith C. L., Hsu Y. T., Youle R. J., 1999 Conformation of the Bax C-  
1019 terminus regulates subcellular location and cell death. *EMBO J* **18**: 2330–2341.
- 1020 Neupert W., 2015 A Perspective on Transport of Proteins into Mitochondria: A Myriad  
1021 of Open Questions. *J Mol Biol* **427**: 1135–1158.
- 1022 O'Neil K. T., DeGrado W. F., 1990 A thermodynamic scale for the helix-forming  
1023 tendencies of the commonly occurring amino acids. *Science* **250**: 646–651.
- 1024 Okreglak V., Walter P., 2014 The conserved AAA-ATPase Msp1 confers organelle  
1025 specificity to tail-anchored proteins. *Proceedings of the National Academy of  
1026 Sciences* **111**: 8019–8024.
- 1027 Oldenburg K. R., Vo K. T., Michaelis S., Paddon C., 1997 Recombination-mediated  
1028 PCR-directed plasmid construction in vivo in yeast. *Nucleic Acids Res* **25**: 451–  
1029 452.
- 1030 Ospina A., Lagunas-Martínez A., Pardo J., Carrodegua J. A., 2011 Protein  
1031 oligomerization mediated by the transmembrane carboxyl terminal domain of Bcl-

- 1032 XL. FEBS Lett **585**: 2935–2942.
- 1033 Ott M., Norberg E., Walter K. M., Schreiner P., Kemper C., Rapaport D., Zhivotovsky  
1034 B., Orrenius S., 2007 The mitochondrial TOM complex is required for tBid/Bax-  
1035 induced cytochrome c release. J Biol Chem **282**: 27633–27639.
- 1036 Öjemalm K., Higuchi T., Lara P., Lindahl E., Suga H., Heijne von G., 2016 Energetics of  
1037 side-chain snorkeling in transmembrane helices probed by nonproteinogenic amino  
1038 acids. Proceedings of the National Academy of Sciences **113**: 10559–10564.
- 1039 Pavlidis P., Noble W. S., 2003 Matrix2png: a utility for visualizing matrix data.  
1040 Bioinformatics **19**: 295–296.
- 1041 Pédelacq J.-D., Cabantous S., Tran T., Terwilliger T. C., Waldo G. S., 2005 Engineering  
1042 and characterization of a superfolder green fluorescent protein. Nat Biotechnol **24**:  
1043 79–88.
- 1044 Prinz W. A., Grzyb L., Veenhuis M., Kahana J. A., Silver P. A., Rapoport T. A., 2000  
1045 Mutants affecting the structure of the cortical endoplasmic reticulum in  
1046 *Saccharomyces cerevisiae*. J Cell Biol **150**: 461–474.
- 1047 Rapaport D., 2003 Finding the right organelle. Targeting signals in mitochondrial outer-  
1048 membrane proteins. EMBO Rep **4**: 948–952.
- 1049 Robinson J. S., Klionsky D. J., Banta L. M., Emr S. D., 1988 Protein sorting in  
1050 *Saccharomyces cerevisiae*: isolation of mutants defective in the delivery and  
1051 processing of multiple vacuolar hydrolases. Mol Cell Biol **8**: 4936–4948.
- 1052 Russ W. P., Engelman D. M., 2000 The GxxxG motif: A framework for transmembrane  
1053 helix-helix association. J Mol Biol **296**: 911–919.
- 1054 Ryan K. R., Leung R. S., Jensen R. E., 1998 Characterization of the mitochondrial inner  
1055 membrane translocase complex: the Tim23p hydrophobic domain interacts with  
1056 Tim17p but not with other Tim23p molecules. Mol Cell Biol **18**: 178–187.
- 1057 Schinzel A., Kaufmann T., Schuler M., Martinalbo J., Grubb D., Borner C., 2004  
1058 Conformational control of Bax localization and apoptotic activity by Pro168. J Cell  
1059 Biol **164**: 1021–1032.
- 1060 Schuldiner M., Metz J., Schmid V., Denic V., Rakwalska M., Schmitt H. D.,  
1061 Schwappach B., Weissman J. S., 2008 The GET Complex Mediates Insertion of  
1062 Tail-Anchored Proteins into the ER Membrane. Cell **134**: 634–645.
- 1063 Segrest J. P., De Loof H., Dohlman J. G., Brouillette C. G., Anantharamaiah G. M.,  
1064 1990 Amphipathic Helix Motif: Classes and Properties. PROTEINS: Structure,  
1065 Function, and Genetics **8**: 103–117.

- 1066 Senes A., Engel D. E., DeGrado W. F., 2004 Folding of helical membrane proteins: the  
1067 role of polar, GxxxG-like and proline motifs. *Current Opinion in Structural Biology*  
1068 **14**: 465–479.
- 1069 Sesaki H., Jensen R. E., 1999 Division versus fusion: Dnm1p and Fzo1p  
1070 antagonistically regulate mitochondrial shape. *J Cell Biol* **147**: 699–706.
- 1071 Setoguchi K., Otera H., Mihara K., 2006 Cytosolic factor- and TOM-independent import  
1072 of C-tail-anchored mitochondrial outer membrane proteins. *EMBO J* **25**: 5635–  
1073 5647.
- 1074 Sikorski R. S., Hieter P., 1989 A system of shuttle vectors and yeast host strains  
1075 designed for efficient manipulation of DNA in *Saccharomyces cerevisiae*. *Genetics*  
1076 **122**: 19–27.
- 1077 Sinzel M., Tan T., Wendling P., Kalbacher H., Özbalci C., Chelius X., Westermann B.,  
1078 Brügger B., Rapaport D., Dimmer K. S., 2016 Mcp3 is a novel mitochondrial outer  
1079 membrane protein that follows a unique IMP-dependent biogenesis pathway.  
1080 *EMBO Rep* **17**: 965–981.
- 1081 Soding J., 2005 Protein homology detection by HMM-HMM comparison.  
1082 *Bioinformatics* **21**: 951–960.
- 1083 Starita L. M., Young D. L., Islam M., Kitzman J. O., Gullingsrud J., Hause R. J., Fowler  
1084 D. M., Parvin J. D., Shendure J., Fields S., 2015 Massively Parallel Functional  
1085 Analysis of BRCA1 RING Domain Variants. *Genetics* **200**: 413–422.
- 1086 Stirling C. J., Rothblatt J., Hosobuchi M., Deshaies R., Schekman R., 1992 Protein  
1087 translocation mutants defective in the insertion of integral membrane proteins into  
1088 the endoplasmic reticulum. *Mol Biol Cell* **3**: 129–142.
- 1089 Stojanovski D., Guiard B., Kozjak-Pavlovic V., Pfanner N., Meisinger C., 2007  
1090 Alternative function for the mitochondrial SAM complex in biogenesis of alpha-  
1091 helical TOM proteins. *J Cell Biol* **179**: 881–893.
- 1092 Stojanovski D., Koutsopoulos O. S., Okamoto K., Ryan M. T., 2004 Levels of human  
1093 Fis1 at the mitochondrial outer membrane regulate mitochondrial morphology.  
1094 *Journal of Cell Science* **117**: 1201–1210.
- 1095 Strandberg E., Killian J. A., 2003 Snorkeling of lysine side chains in transmembrane  
1096 helices: how easy can it get? *FEBS Lett* **544**: 69–73.
- 1097 Suzuki M., Jeong S. Y., Karbowski M., Youle R. J., Tjandra N., 2003 The solution  
1098 structure of human mitochondria fission protein Fis1 reveals a novel TPR-like helix  
1099 bundle. *J Mol Biol* **334**: 445–458.

- 1100 Taxis C., Knop M., 2006 *System of centromeric, episomal, and integrative vectors*  
1101 *based on drug resistance markers for Saccharomyces cerevisiae*.
- 1102 Tieu Q., Nunnari J., 2000 Mdv1p is a WD repeat protein that interacts with the  
1103 dynamin-related GTPase, Dnm1p, to trigger mitochondrial division. *J Cell Biol* **151**:  
1104 353–366.
- 1105 Vidal M., Brachmann R. K., Fattaey A., Harlow E., Boeke J. D., 1996a Reverse two-  
1106 hybrid and one-hybrid systems to detect dissociation of protein-protein and DNA-  
1107 protein interactions. *Proc Natl Acad Sci USA* **93**: 10315–10320.
- 1108 Vidal M., Braun P., Chen E., Boeke J. D., Harlow E., 1996b Genetic characterization of  
1109 a mammalian protein-protein interaction domain by using a yeast reverse two-  
1110 hybrid system. *Proc Natl Acad Sci USA* **93**: 10321–10326.
- 1111 Wattenberg B., Lithgow T., 2001 Targeting of C-terminal (tail)-anchored proteins:  
1112 understanding how cytoplasmic activities are anchored to intracellular membranes.  
1113 *Traffic* **2**: 66–71.
- 1114 Wattenberg B. W., Clark D., Brock S., 2007 An artificial mitochondrial tail signal/anchor  
1115 sequence confirms a requirement for moderate hydrophobicity for targeting. *Biosci*  
1116 *Rep* **27**: 385–401.
- 1117 Wells R. C., Hill R. B., 2011 The cytosolic domain of Fis1 binds and reversibly clusters  
1118 lipid vesicles. (P Kursula, Ed.). *PLoS ONE* **6**: e21384.
- 1119 Yu C.-H., Dang Y., Zhou Z., Wu C., Zhao F., Sachs M. S., Liu Y., 2015 Codon Usage  
1120 Influences the Local Rate of Translation Elongation to Regulate Co-translational  
1121 Protein Folding. *Molecular Cell* **59**: 744–754.
- 1122 Zhou Z., Dang Y., Zhou M., Li L., Yu C.-H., Fu J., Chen S., Liu Y., 2016 Codon usage is  
1123 an important determinant of gene expression levels largely through its effects on  
1124 transcription. *Proceedings of the National Academy of Sciences* **113**: E6117–  
1125 E6125.
- 1126
- 1127



1128 **SUPPLEMENTAL FIGURE AND TABLE LEGENDS:**

1129

1130 **Figure S1.** Structural and sequence characteristics of the Fis1p TA. (A) The Fis1p TA is  
1131 predicted to be a transmembrane helix. The indicated amino acid sequence was tested  
1132 using the TMHMM Server version 2.0 (Krogh *et al.* 2001), and individual amino acid  
1133 scores were plotted. The predicted MAD is indicated. (B) Glycines are abundant  
1134 among Fis1p orthologs. Fis1 proteins from the listed species (Uniprot access numbers  
1135 listed) were aligned using Clustal Omega (Soding 2005). Glycines are colored green,  
1136 positively charged amino acids are colored purple, negatively charged amino acids are  
1137 colored blue, and proteins are colored red. A red bar over the alignment indicates the  
1138 predicted MAD, and a black arrow denotes a potentially conserved glycine. The region  
1139 necessary and sufficient for Fis1p insertion is bracketed in pink.

1140

1141 **Figure S2.** Amino acid replacement representation within the Gal4-sfGFP-Fis1p TA  
1142 library. The fraction of counts representing each amino acid replacement in the starting  
1143 SC-Trp library (fObs) was compared to the fraction that would be expected based on  
1144 randomized codon recovery (fExp). Native amino acids are represented by a black  
1145 square with a blue dot. Amino acid replacements with no representation in the library  
1146 are represented by empty black squares. The predicted MAD is indicated by a red line.

1147

1148 **Figure S3.** Amino acid replacement frequencies within the Fis1p TA under differing  
1149 selective pressure. Quantification of replacement in SMM-Trp-His medium without 3-  
1150 AT (A), containing 5 mM 3-AT (B), containing 10mM 3-AT (C), or in SC-Ura medium (D).  
1151 In all panels, black outlines indicate the native amino acid at each position within the  
1152 Fis1p TA. Amino acid replacements not detectable under selective conditions are  
1153 denoted by black, filled squares. The predicted MAD is indicated by a red line.

1154

1155 **Figure S4.** Little evidence exists for codon-level control of Gal4-sfGFP-Fis1p TA  
1156 targeting. The  $\log_2$  of enrichment values for each codon following selection of the Fis1p  
1157 TA library in SMM-Trp-His medium containing 20 mM 3-AT are illustrated. Green

1158 outlines denote the native amino acid at each position. Codon replacements with no  
1159 representation in the library following selection are represented by empty black  
1160 squares. The predicted MAD is indicated by a red line.

1161

1162 **Figure S5.** Deletion of Msp1p or Dsk2p does not allow recovery of mitochondrial  
1163 localization by poorly targeted mCherry-TA variants. (A) Deletion of the Msp1p  
1164 extractase does not allow tail-anchored proteins mistargeted due to proline  
1165 substitutions to return to mitochondria. Cells from *msp1Δ/msp1Δ* strain CDD1044  
1166 expressing pHS1 (signal not shown) and plasmids b109 (WT), b208 (V134P), b135  
1167 (L139P), b210 (A140P), or b211 (A144P) were examined to determine mCherry-TA  
1168 location. (B) Deletion of ubiquilin ortholog Dsk2p does not allow mislocalized, proline-  
1169 containing Fis1p TAs to target to mitochondria. Cells from *dsk2Δ/dsk2Δ* strain  
1170 CDD1179 were transformed and analyzed as in (A). (C) Deletion of Msp1p does not  
1171 allow mitochondrial localization of mistargeted Fis1p TAs carrying charge  
1172 replacements. Strain CDD1044, deleted of Msp1p, was transformed with the following  
1173 plasmids encoding mCherry fused to the mutant TAs: b192 (V132D), b196 (A140D),  
1174 b197 (A140E), b198 (A140K), b199 (A140R), b200 (A144D), b201 (A144E), b134  
1175 (V145E), b204 (F148D), b205 (F148E). Transformants were examined as in (A). (D)  
1176 Removal of Dsk2p fails to allow mutant TAs containing charge substitutions to re-  
1177 localized to mitochondria. Strain CDD1179 was transformed with plasmids and  
1178 analyzed as in (C). Scale bar, 5 μm.

1179

1180 **Figure S6.** A mutated Fis1p TA lacking the positively charged carboxyl-terminus  
1181 localizes to the ER independently of Get3p or Get2p. (A) Get3p is not required for ER  
1182 localization of the R151X TA. *get3Δ/get3Δ* strain CDD1033 expressing mCherry fused  
1183 to a WT Fis1p TA from plasmid b109 or expressing mCherry fused to a Fis1p TA  
1184 lacking the positively charged carboxyl-terminus (R151X) from plasmid b254 were  
1185 examined, and mitochondria were labelled with GFP expressed from pHS1. (B)  
1186 *get3Δ/get3Δ* strain CDD1033 carrying plasmids b109 or b254 were examined by  
1187 expression of Sec63p-GFP from plasmid pJK59 as in Figure 6C. (C) Get2p is not

1188 necessary for ER localization of the Fis1p TA lacking carboxyl-terminal, positively  
1189 charged amino acids. *get2Δ* strain CDD948 was transformed with plasmid pJK59 and  
1190 either b109 or b254, then imaged as in Figure 6C. White arrows indicate puncta  
1191 containing truncated mCherry-Fis1(TA). Scale bar, 5  $\mu$ m.

1192

1193 **Figure S7.** The TAs of human proteins do not universally target to mitochondria in  
1194 yeast. (A) The hFIS1 TA is mistargeted to the ER in *S. cerevisiae*. Strain CDD961  
1195 containing plasmid b257 expressing mCherry fused to the hFIS1 TA was analyzed as in  
1196 Figure 2B. (B) Strain CDD961 cured of pHS1 and carrying plasmids pJK59 and b257  
1197 was imaged as in Figure 6C. (C) The hFIS1TA does not permit activity of a fused Gal4p  
1198 within the nucleus. Strain MaV203 was transformed with plasmid b100 (Gal4-sfGFP-  
1199 Fis1), b258 [Gal4-hFIS1(TA)], or plasmid b101 (Gal4-sfGFP-Fis1 $\Delta$ TA) and assessed as  
1200 in Figure 5A. (D) The BAX TA can target to mitochondria in *S. cerevisiae*. Strain  
1201 CDD961 transformed with plasmid b255, which expresses mCherry fused to the BAX  
1202 TA, was examined as in Figure 2B. Scale bar, 5  $\mu$ m.

1203

1204 **Figure S8.** mCherry fused to Fis1p TAs of varying length remains targeted to the ER in  
1205 cells lacking Spf1p. (A) Cells of *spf1Δ/spf1Δ* strain CDD1031 expressing mCherry-TA  
1206 fusions from plasmids b109 (WT), b232 ( $\Delta$ G136), b233 ( $\Delta$ A135-G136), b234 ( $\Delta$ A135-  
1207 G137), b235 ( $\nabla$ 1A), b236 ( $\nabla$ 2A), or b237 ( $\nabla$ 3A), were examined as in Figure 2B. (B) The  
1208 same mCherry-linked TAs were analyzed in CDD1031 cells expressing Sec63p-GFP  
1209 from pJK59. Scale bar, 5  $\mu$ m.

1210

1211 **Figure S9.** Temperature and selection-dependent proliferation in the presence of  
1212 charges within the Fis1p MAD. (A) The A144D replacement within Gal4-sfGFP-Fis1p  
1213 allows for strong Gal4-dependent proliferation under stringent selective conditions.  
1214 Cells spotted in Figure 8A were also spotted to SC-Ura medium and incubated at 30°C  
1215 for 2 d. (B) Elevated temperature further distinguishes the behavior of cells expressing  
1216 Gal4-sfGFP-Fis1p carrying positively charged or negatively charged amino acid  
1217 replacements. Cells used in Figure 8A were also spotted to SMM-His + 20mM 3-AT

1218 and incubated at 37°C for 4 d. (C) Cells were treated as in (B), with incubation at 18°C  
1219 for 4 d. (D) Extended incubation of the SMM-His + 20 mM 3-AT plate shown in Figure  
1220 8A for 4 d at 30°C.

1221  
1222 **Figure S10.** Positive and negative charge replacements within the Fis1p TA can  
1223 generally support Fis1p function. (A) Normal mitochondrial morphology can be  
1224 maintained even when charges are placed within the hydrophobic MAD of the Fis1p  
1225 TA. *fis1Δ* strain CDD741, in which mitochondria were visualized by expression of  
1226 mitochondria-targeted GFP from plasmid pHS12, was transformed with vector  
1227 pRS313, a plasmid expressing WT Fis1p (b239), or plasmids expressing Fis1p  
1228 containing the indicated TA alterations (plasmids b240-251). Cells were treated with  
1229 sodium azide to provoke Fis1p-dependent mitochondrial fragmentation, and  
1230 representative images are shown. Scale bar, 5 μm. (B) Cells treated as in (A) were  
1231 scored for the maintenance of a mitochondrial network (n=200 cells). (C) A genetic  
1232 assay of Fis1p function demonstrates that charged residues within the TA allow Fis1p  
1233 activity. *fzo1Δ fis1Δ* strain CDD688, carrying a CHX-counterselectable, *FZO1*-  
1234 expressing plasmid, was transformed with the *FIS1*-expressing plasmids enumerated  
1235 above. After allowing cells to lose the *FZO1*-encoding plasmid, serial dilutions were  
1236 spotted to SLac-His medium containing 3 μg/mL CHX to counterselect against *FZO1*  
1237 expression ("lactate / no fusion") and incubated for 5 d to test for maintenance of  
1238 mtDNA. Cell proliferation indicates a lack of Fis1p activity. To control for cell number  
1239 spotted, cells from the same culture were placed on SMM-Trp-His medium ("glucose /  
1240 fusion") and incubated for 2 d.

1241  
1242 **Figure S11.** A block of peroxisomal membrane biogenesis does not lead to re-  
1243 localization of the Fis1p TA to the cytosol or nucleus. (A) *WT* strain BY4742 and *pex3Δ*  
1244 strain CDD974 were transformed with plasmid b109, expressing mCherry fused to a  
1245 wild-type Fis1p TA, and imaged by fluorescence microscopy. Scale bar, 5 μm. (B)  
1246 Deletion of Pex3p does not lead to increased Gal4-sfGFP-Fis1p transcriptional activity.  
1247 *PEX3* strain MaV203 and isogenic *pex3Δ* strain CDD1172 were transformed with

1248 plasmids b100 (Gal4-sfGFP-Fis1), b101 [Gal4-sfGFP-Fis1( $\Delta$ TA)], or empty vector pKS1  
1249 and treated as in Figure 8A. (C) Relative activity of Gal4-sfGFP-Fis1p containing proline  
1250 substitutions does not change upon Pex3p removal. Strain CDD1172 expressing Gal4-  
1251 sfGFP-Fis1p variants from plasmids b100 (WT), b188 (V134P), b189 (G137P), b129  
1252 (L139P), b190 (A140P), b296 (A144P), or b101 ( $\Delta$ TA) was treated as in (B). (D) Relative  
1253 differences in Gal4-sfGFP-Fis1p transcriptional activity among charge-substituted TAs  
1254 do not change in the absence of Pex3p. Strain CDD1172 transformed with plasmids  
1255 encoding the indicated mutations within the Fis1p TA (plasmids b173-b187 and b295)  
1256 was treated as in (B).

1257

1258 **Table S1.** Tail anchor sequence counts from individual pools.

1259

1260 **Table S2.** Strains used during this study.

1261

1262 **Table S3.** Plasmids used for experiments during this study.

1263

1264 **Table S4.** Oligonucleotides used in this study.

1265

1266

1267

1268

1269

1270

1271

A

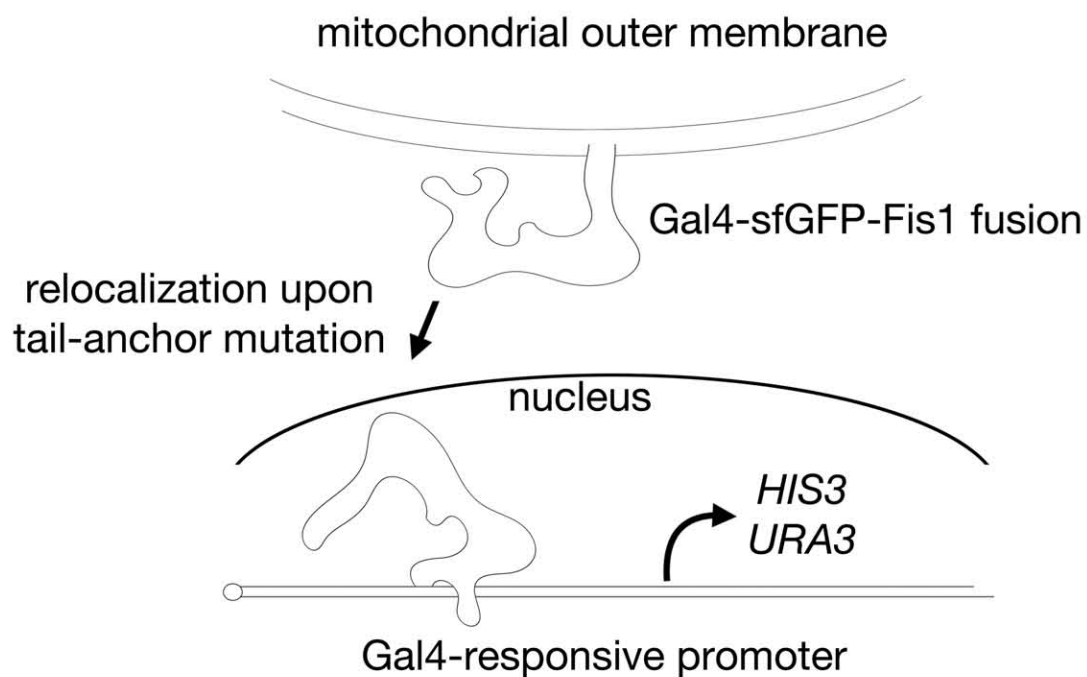

B

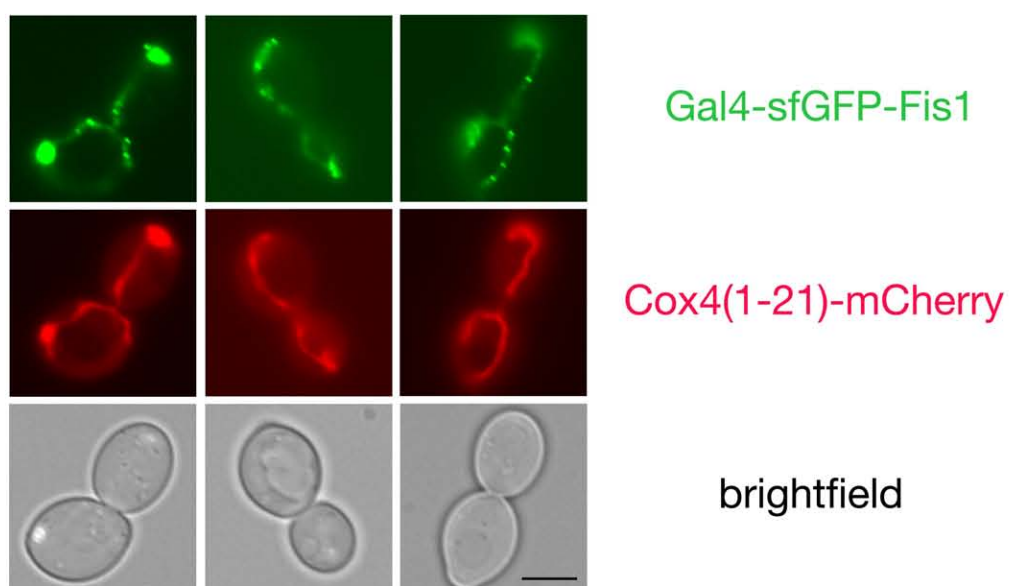

C

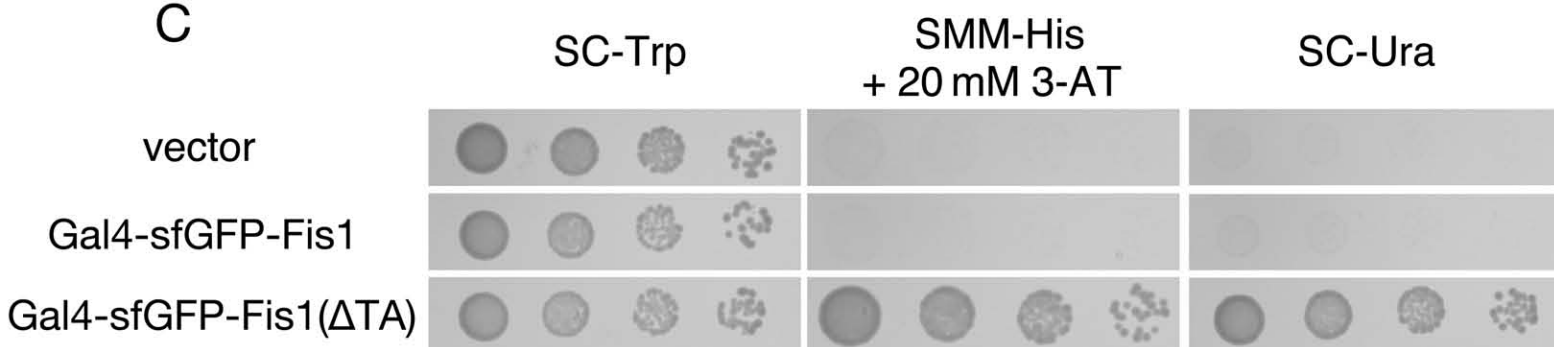

Figure 1

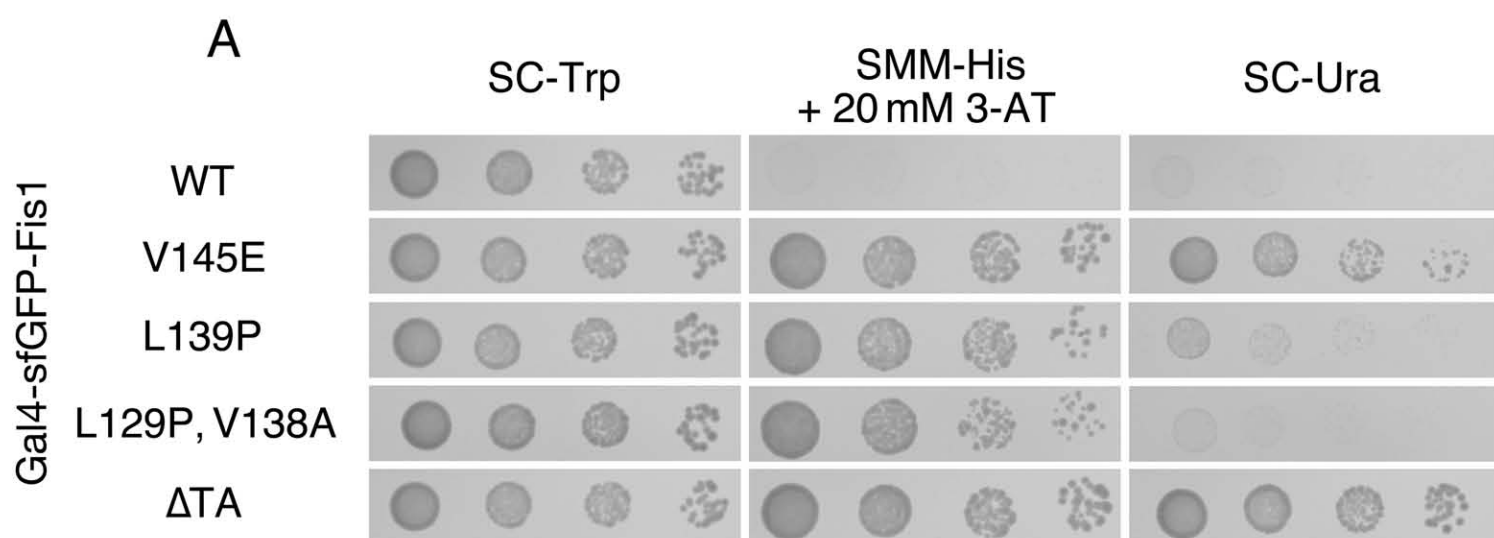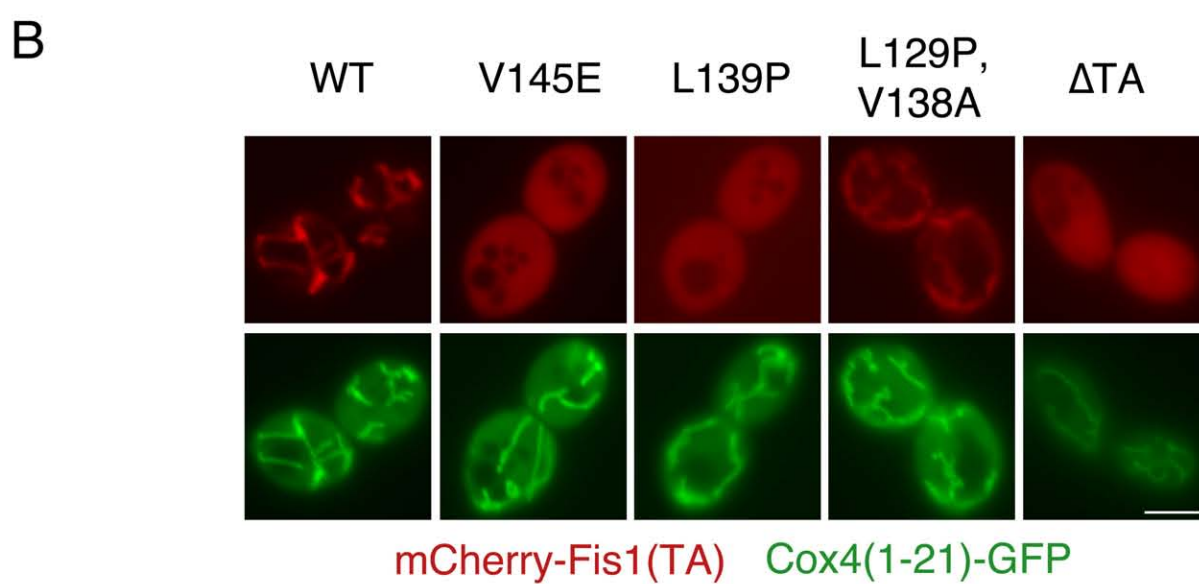

Figure 2





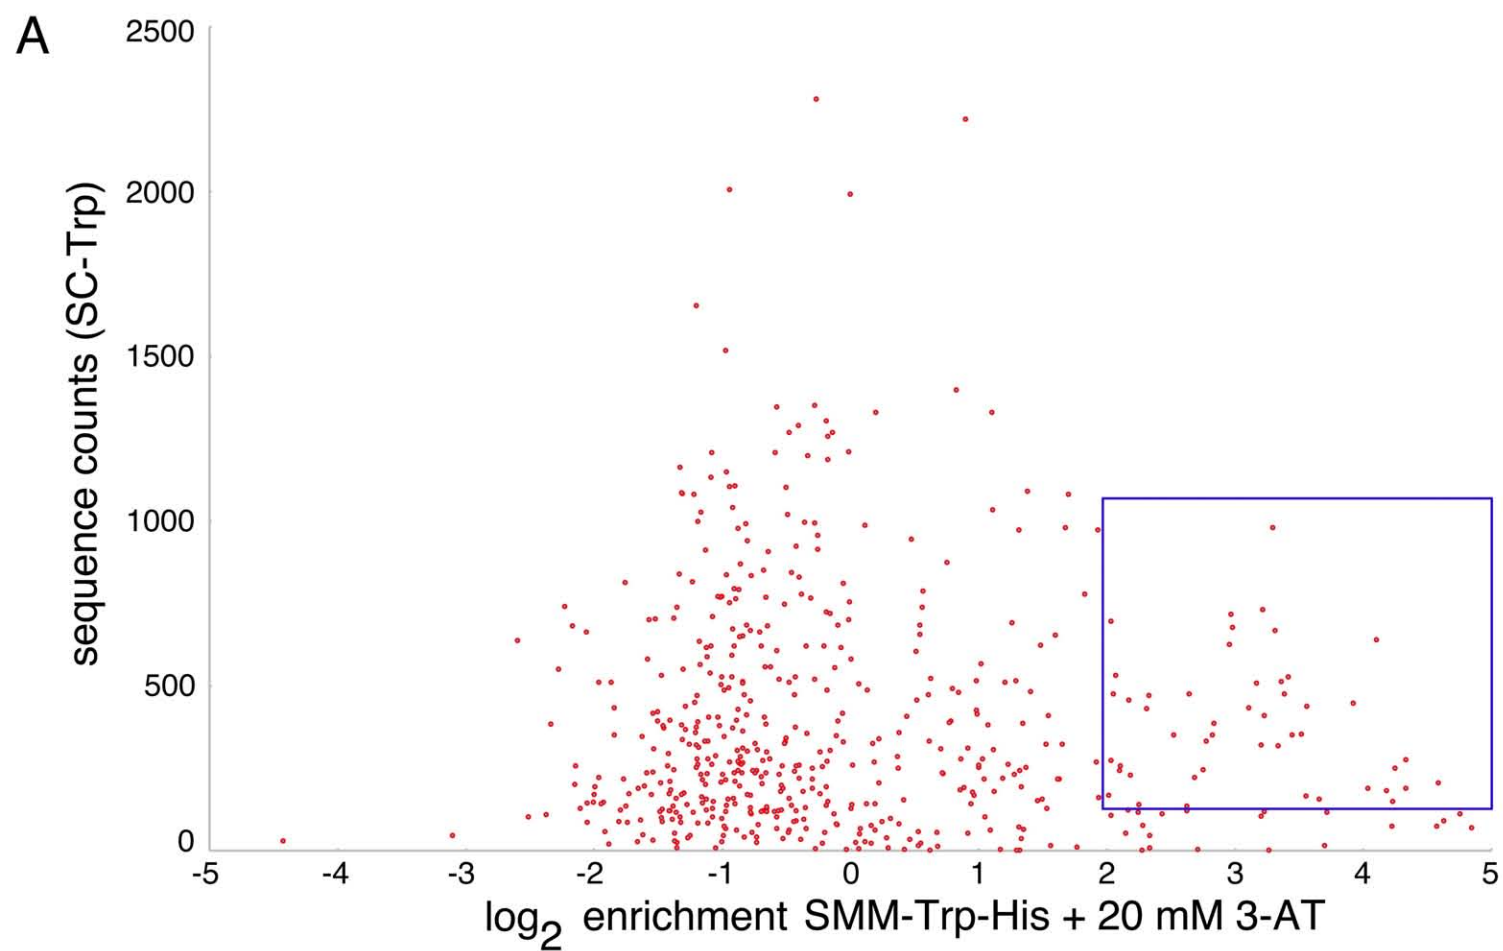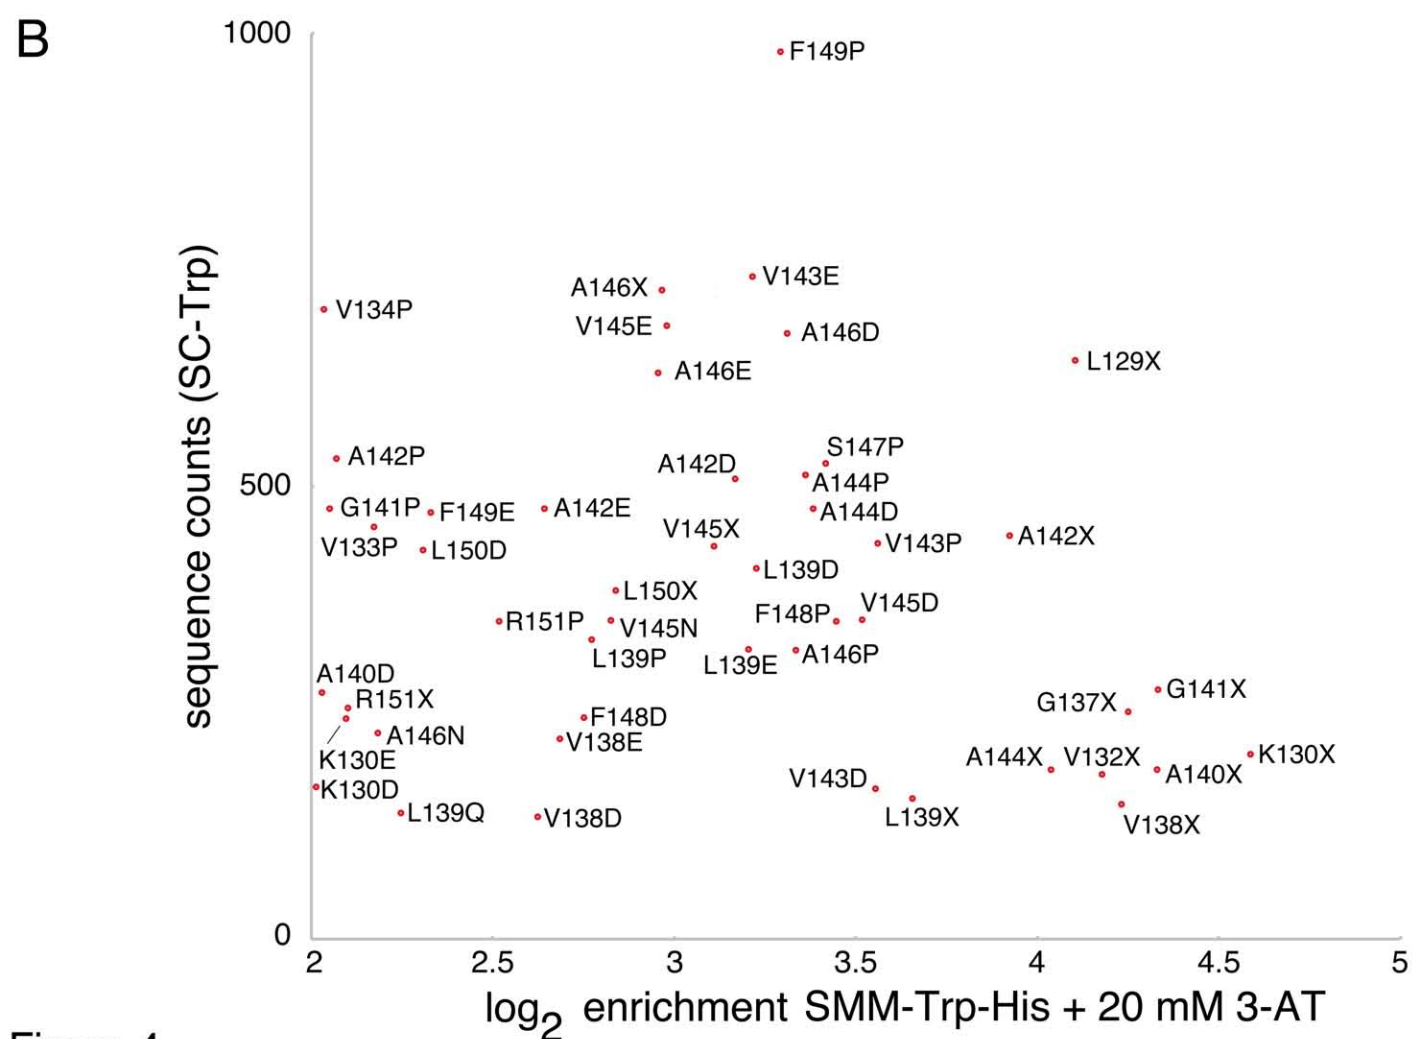

Figure 4

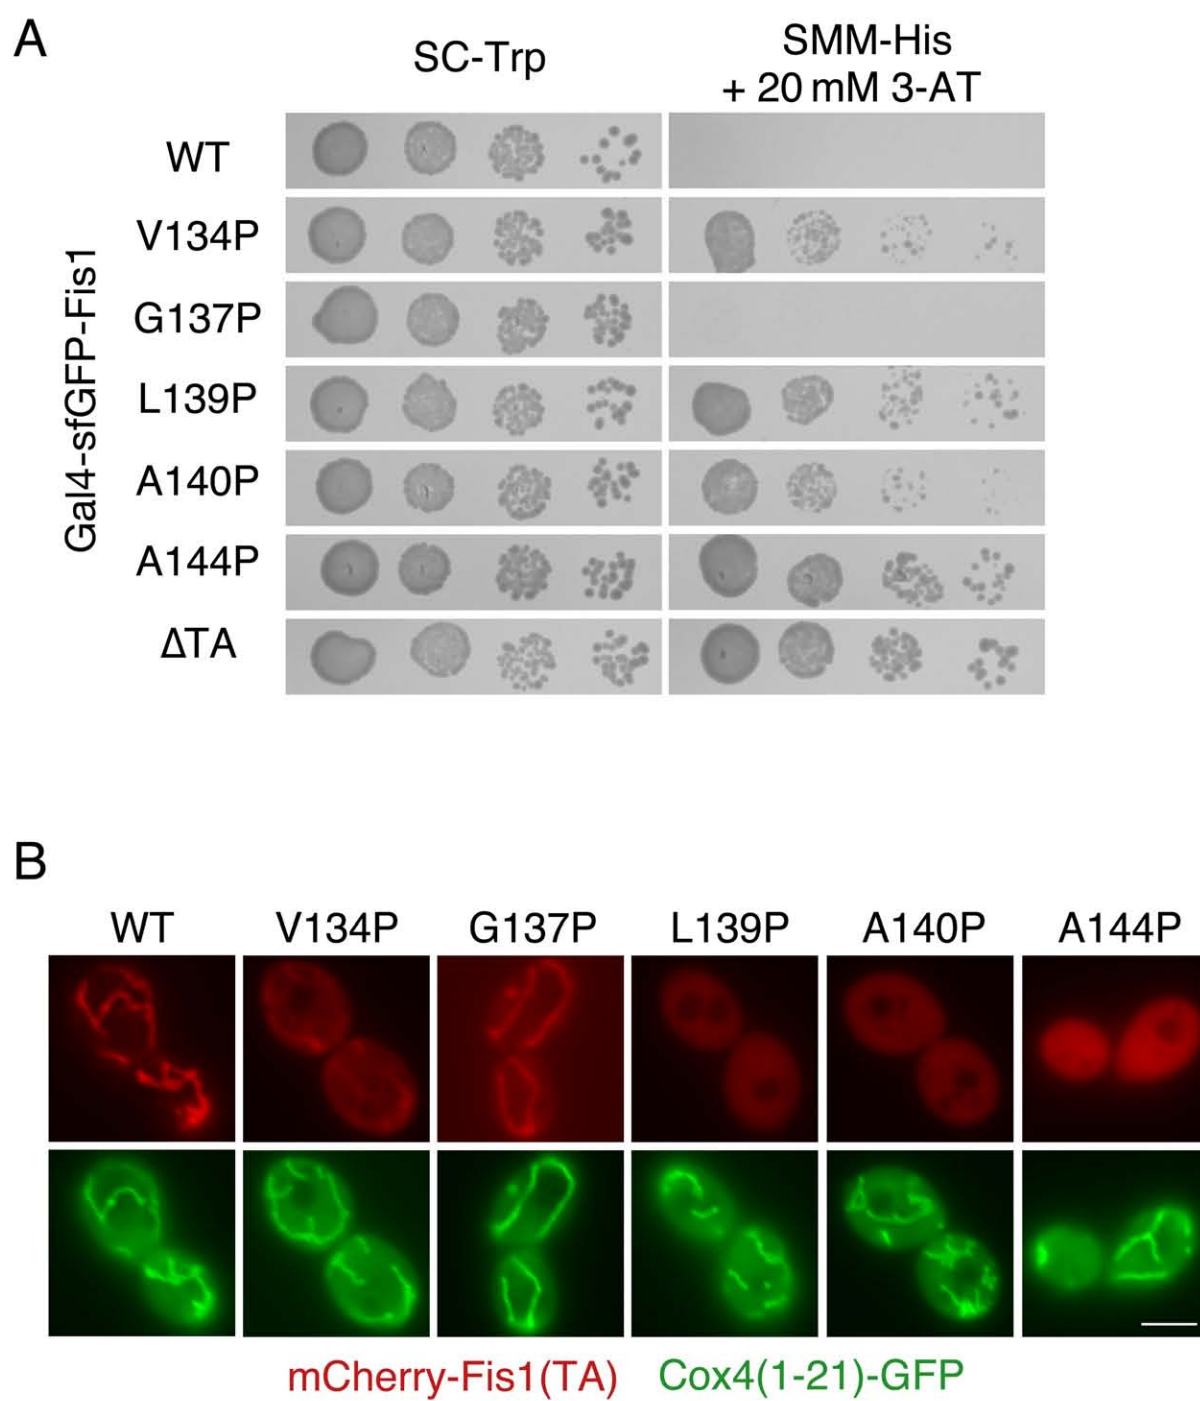

Figure 5

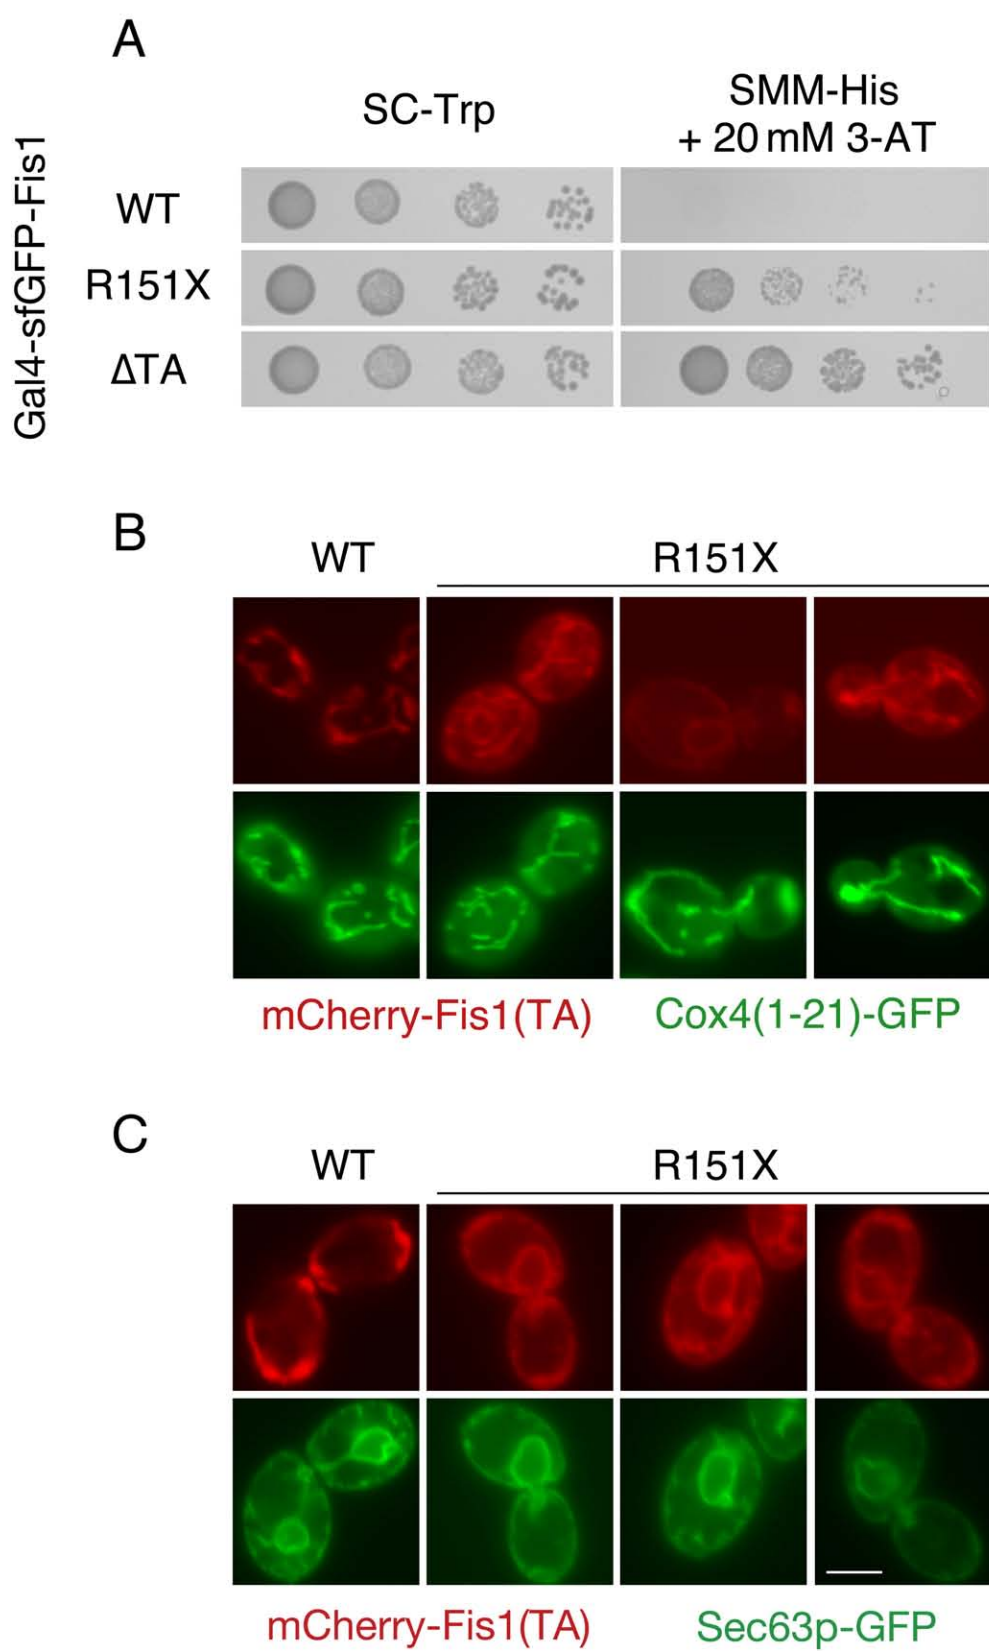

Figure 6

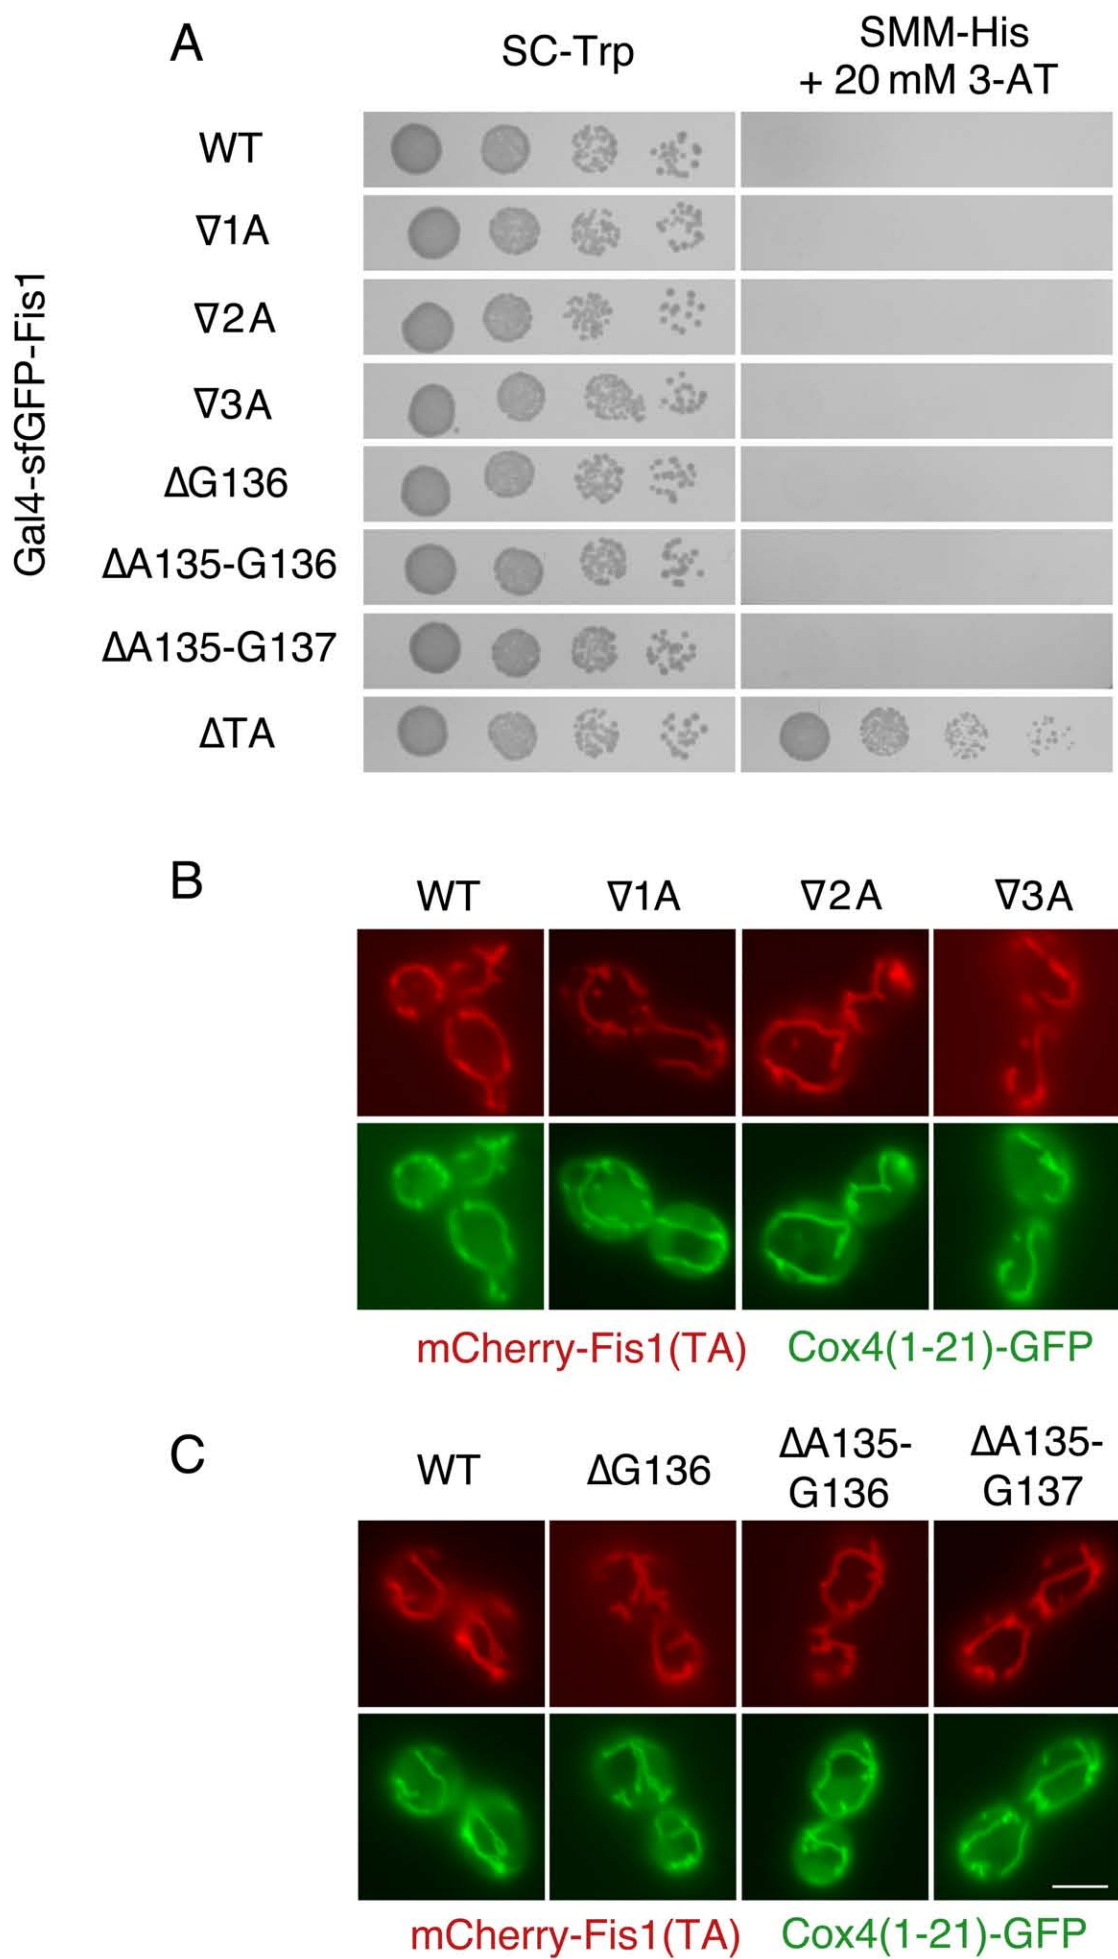

Figure 7

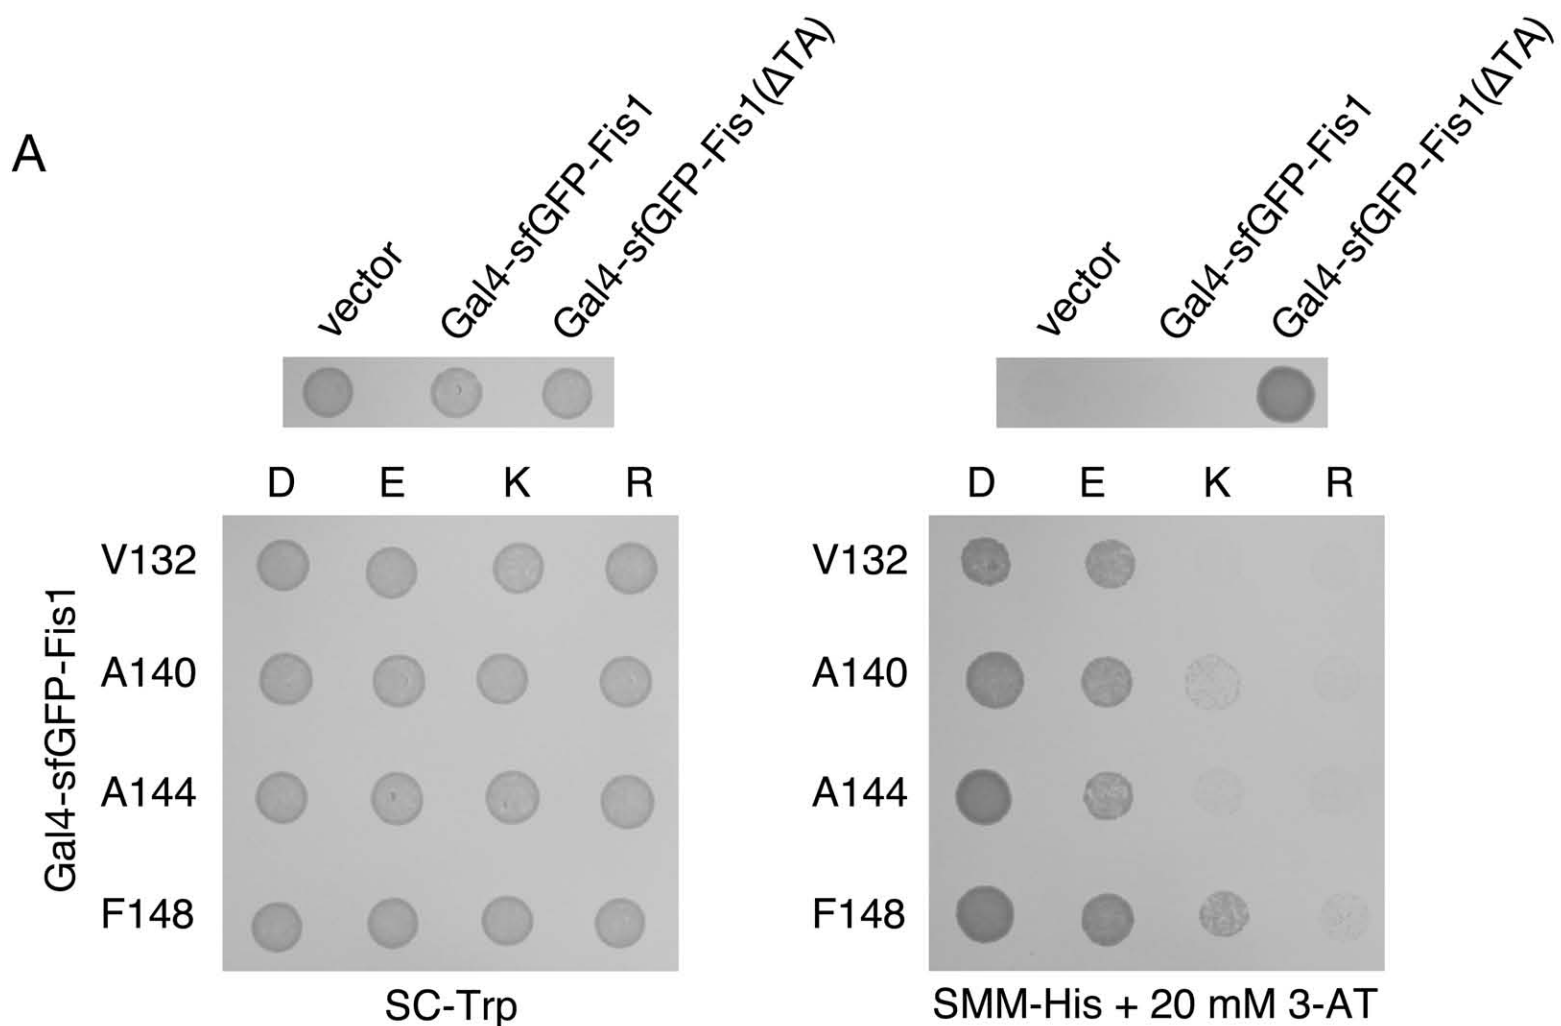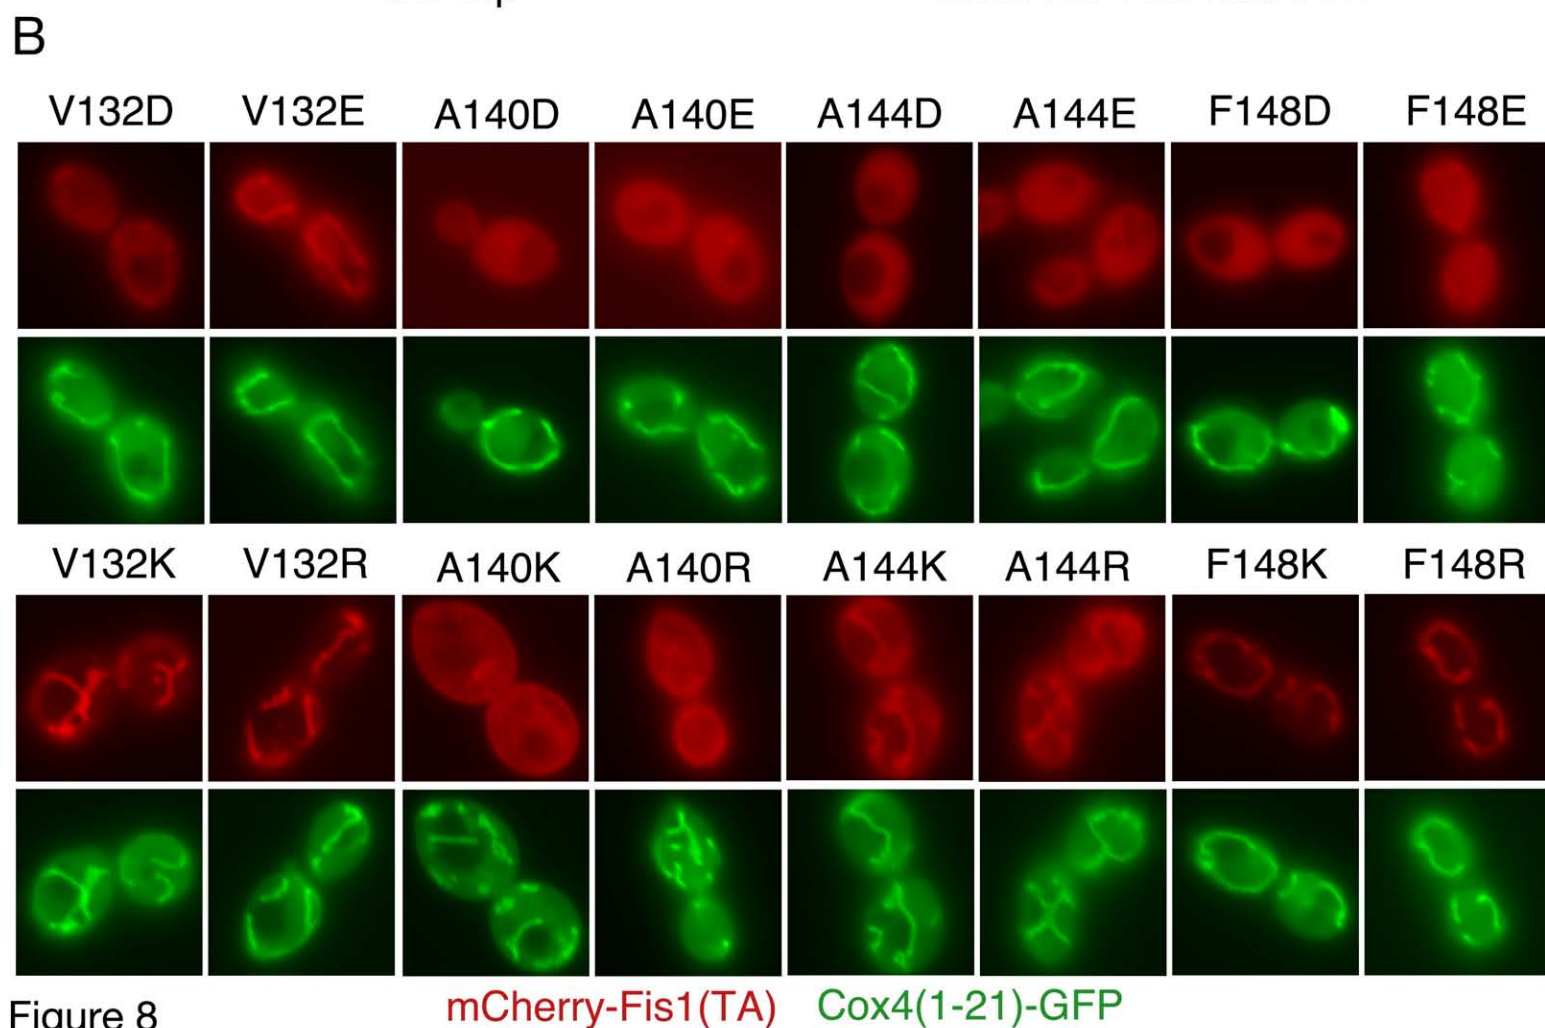

Figure 8

A

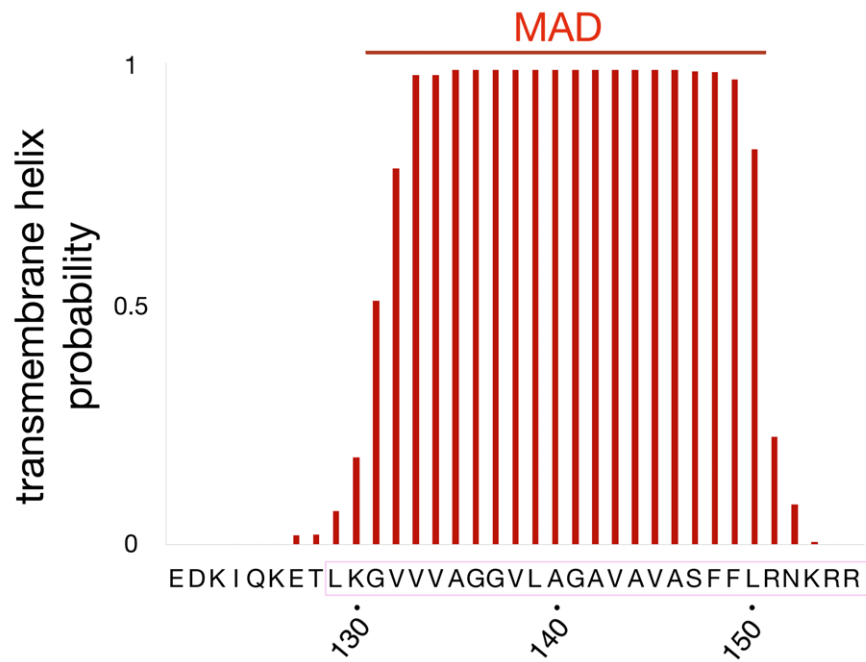

B

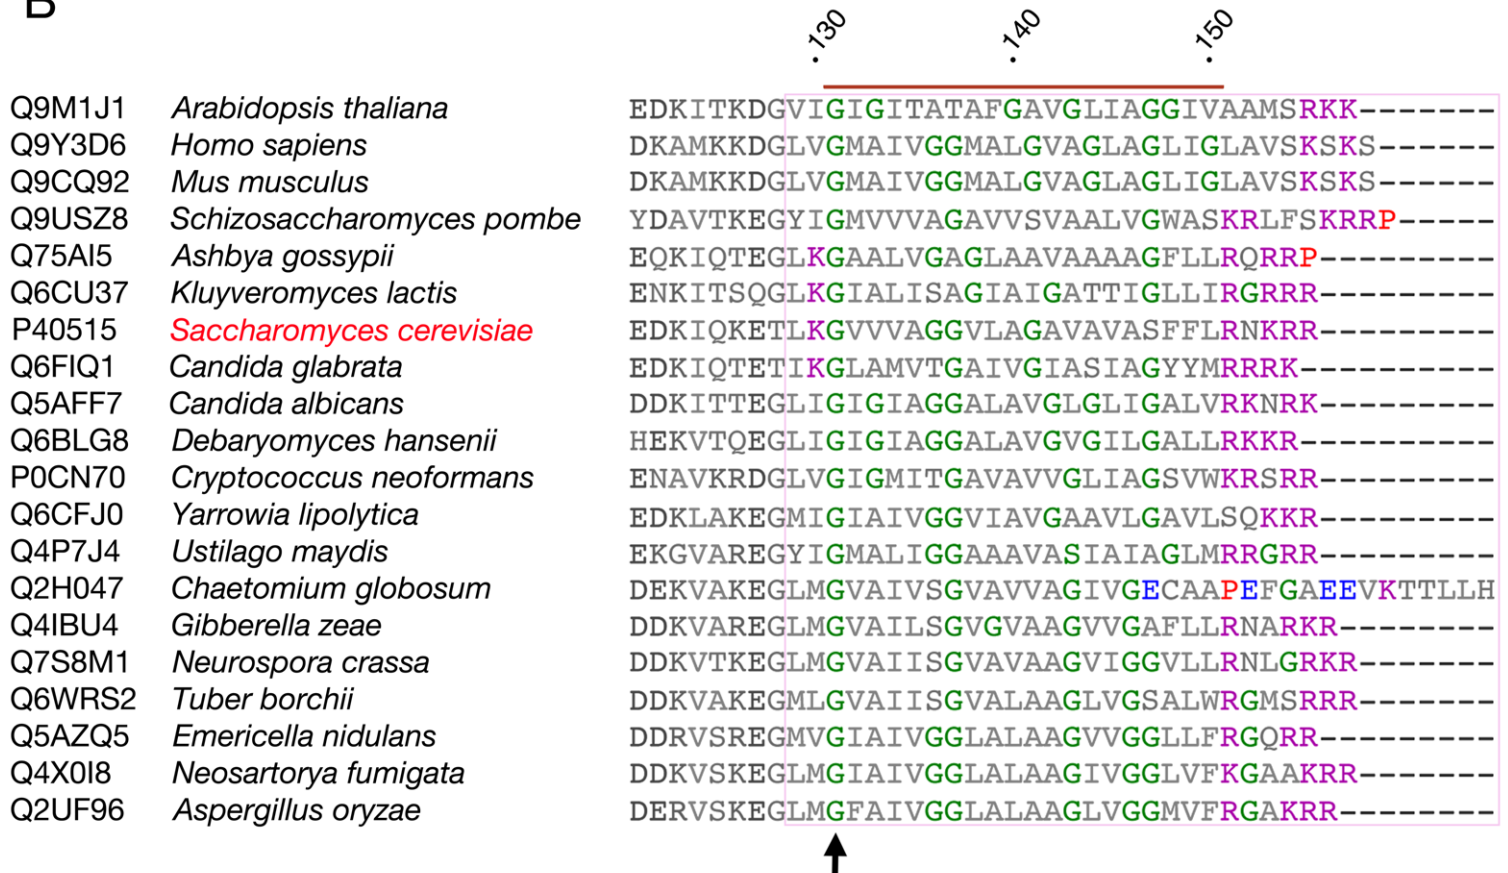

Figure S1

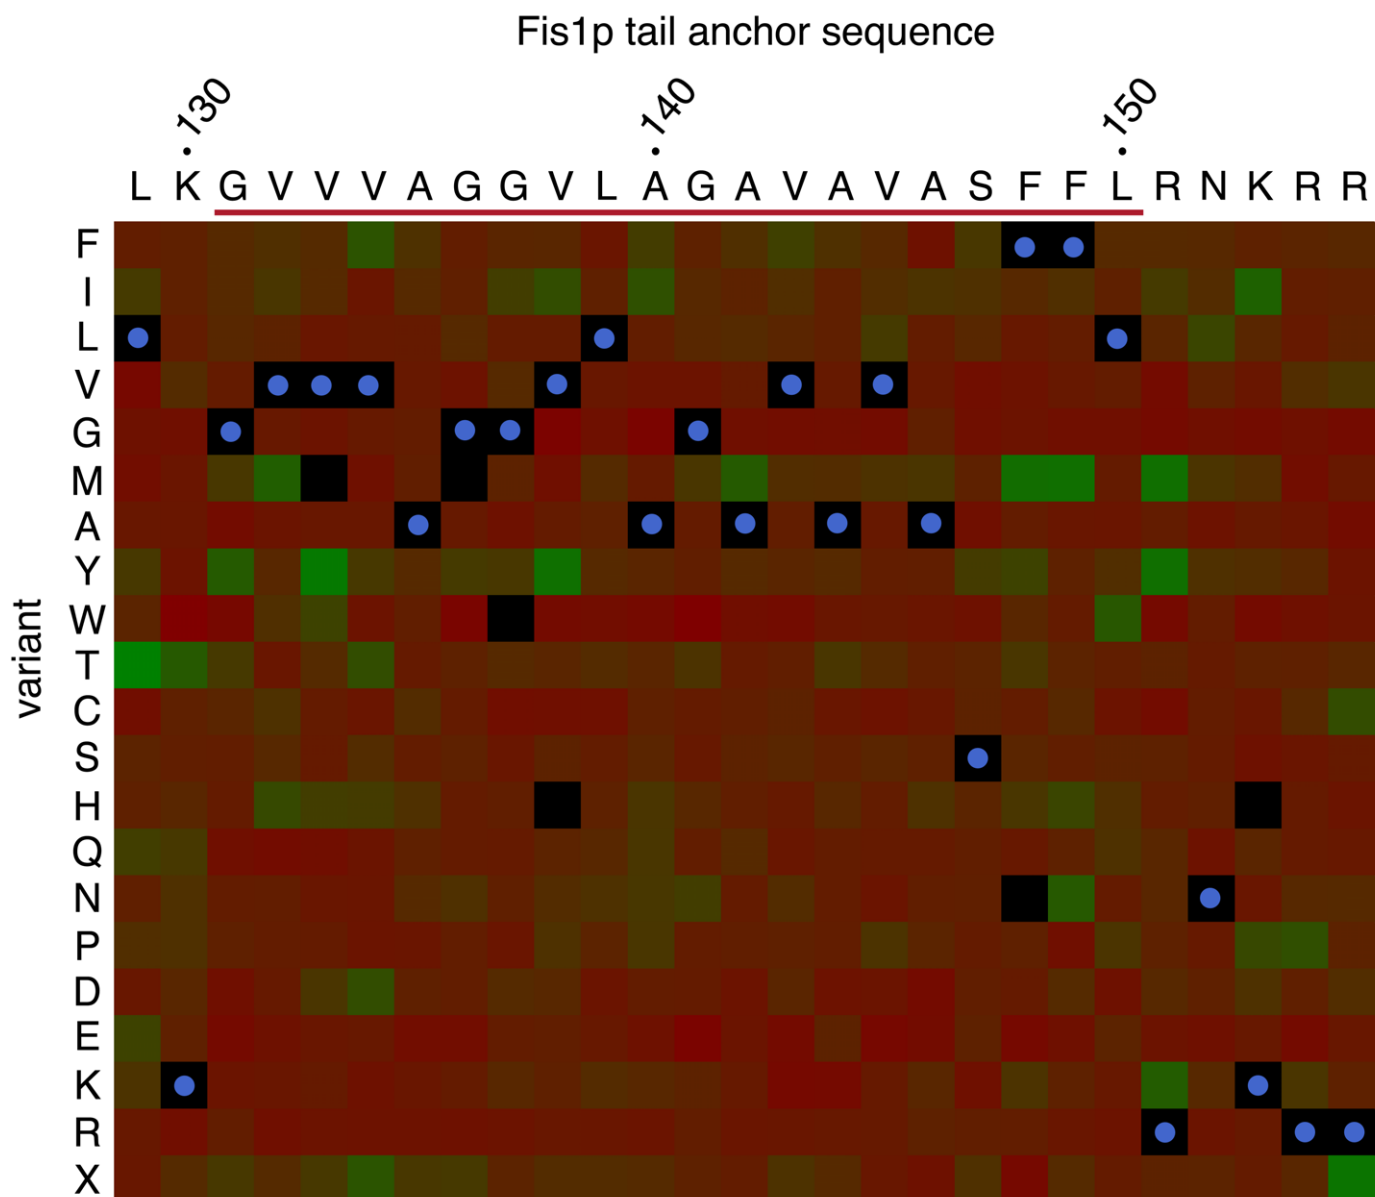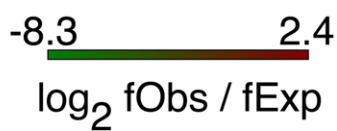

Figure S2

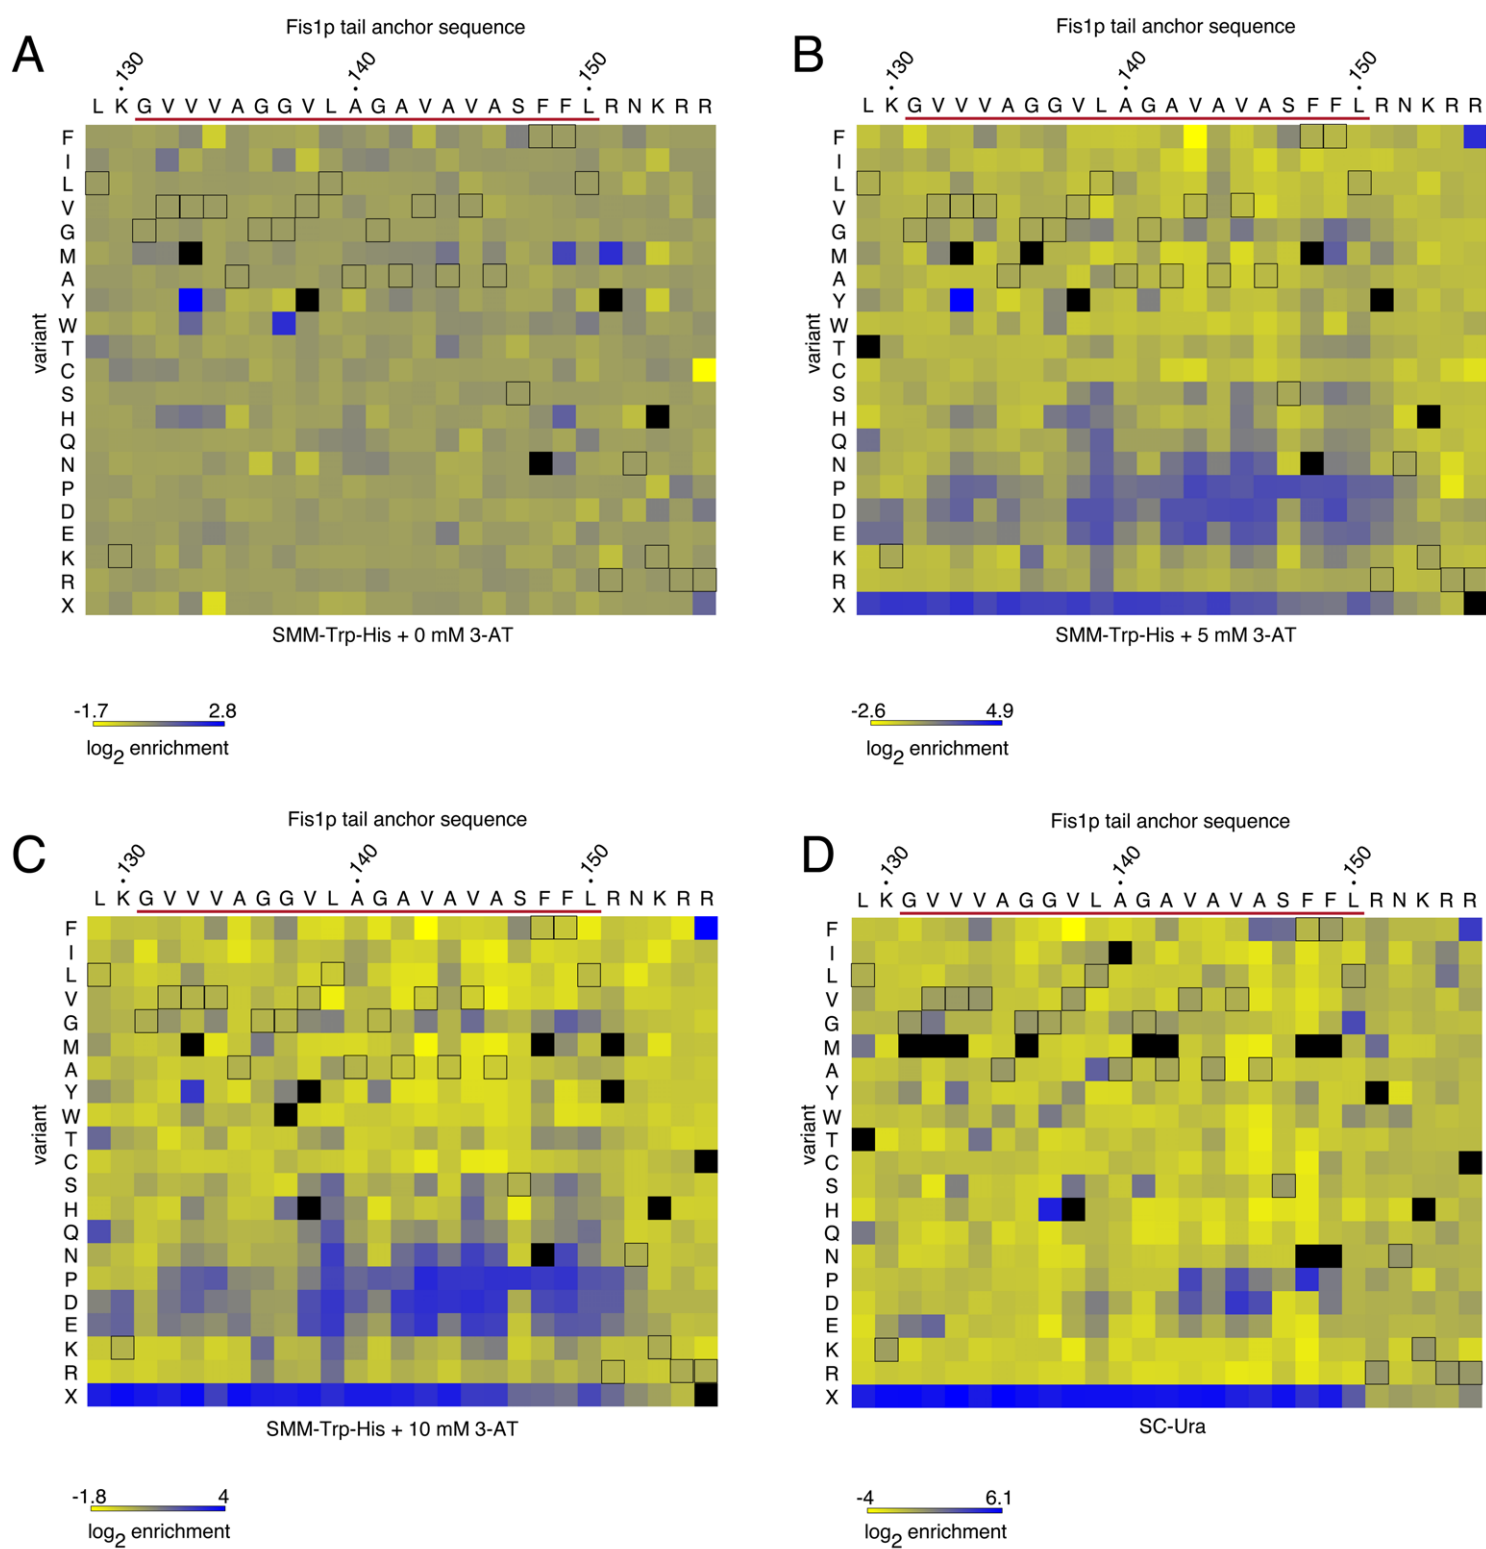

Figure S3



Fis1p tail anchor sequence (codon)

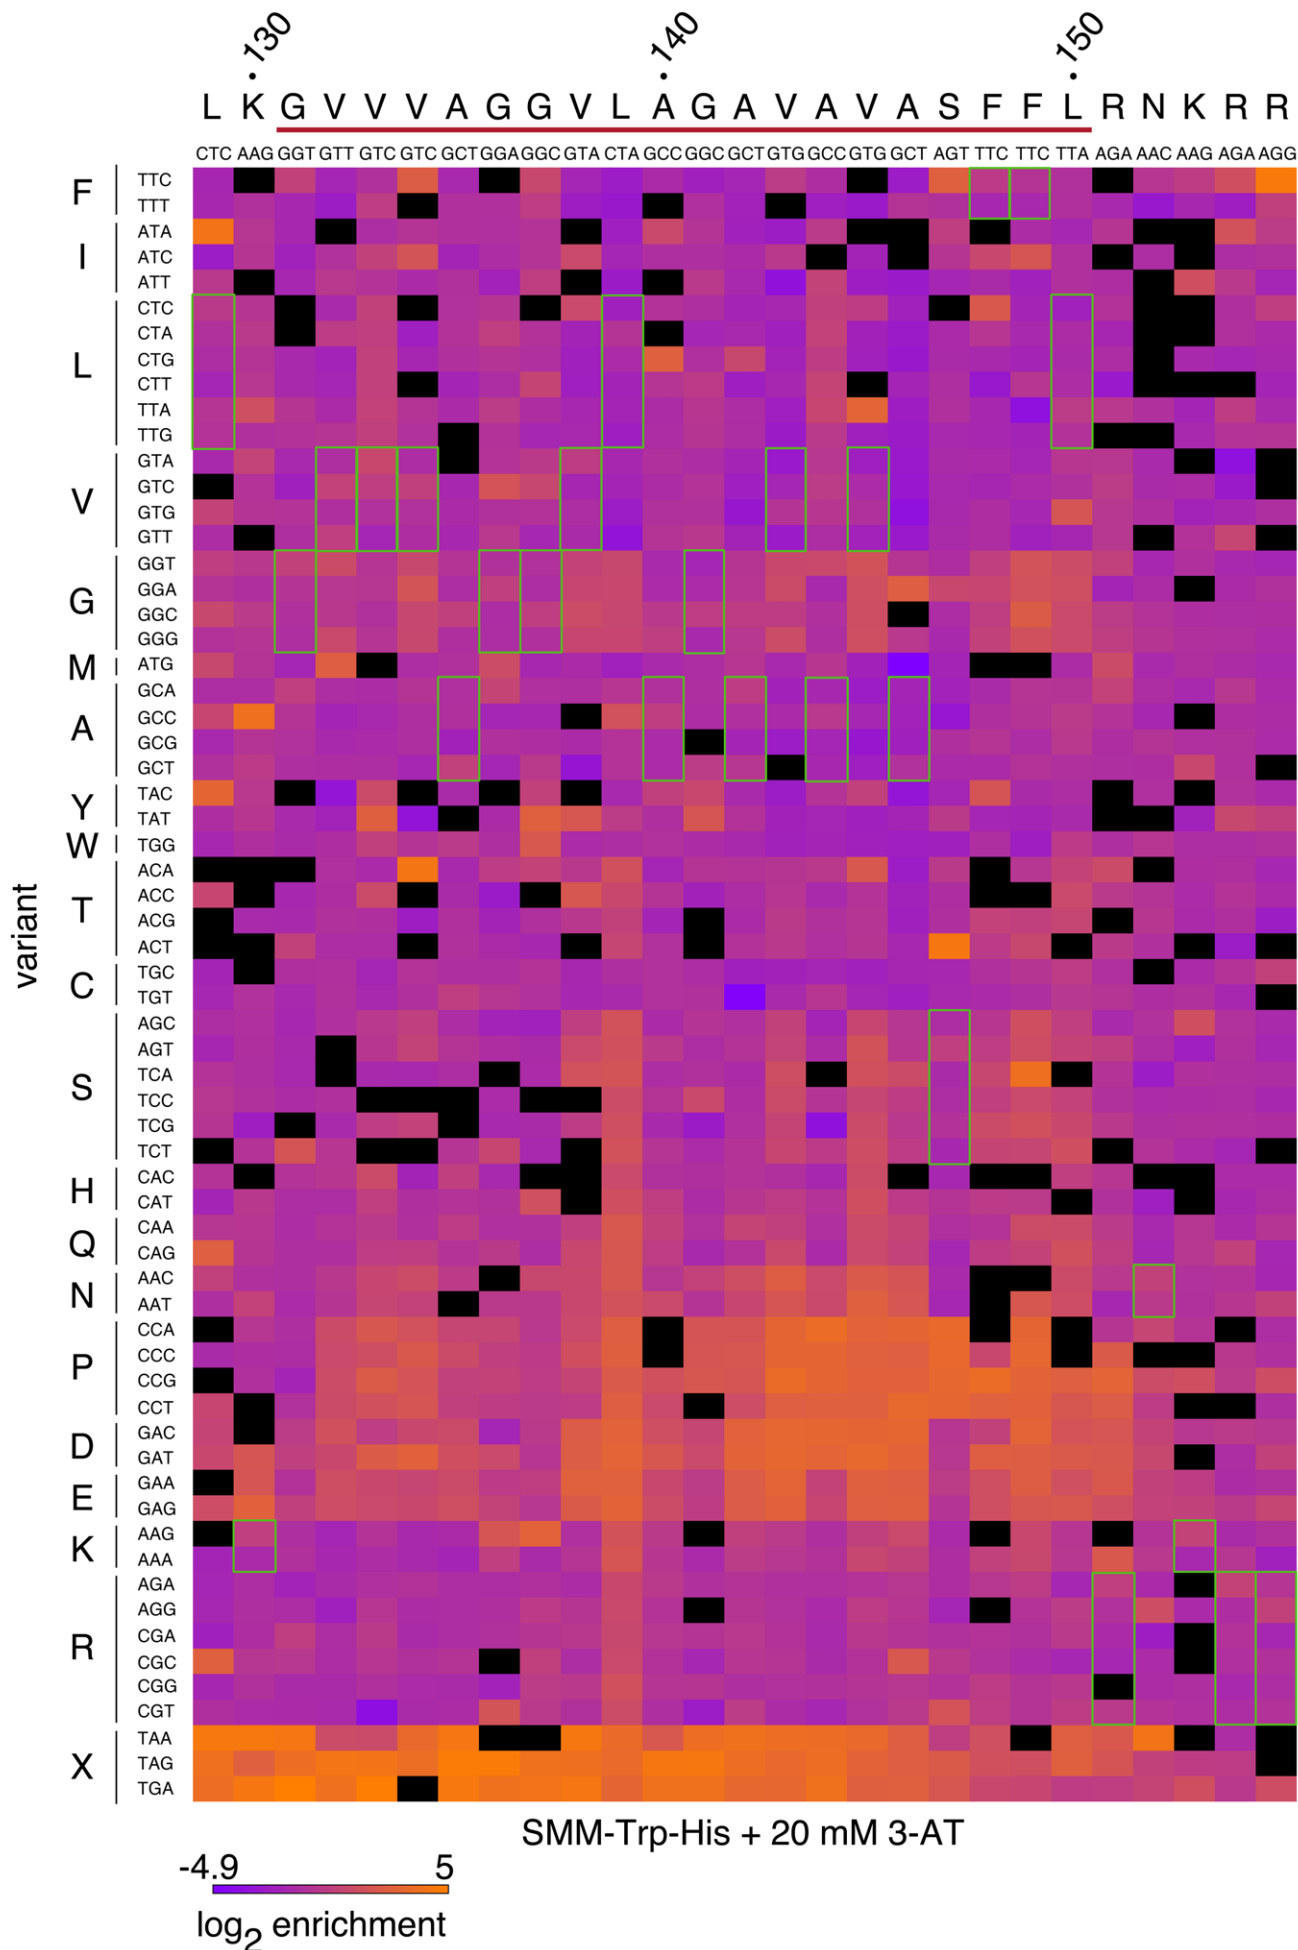

Figure S4

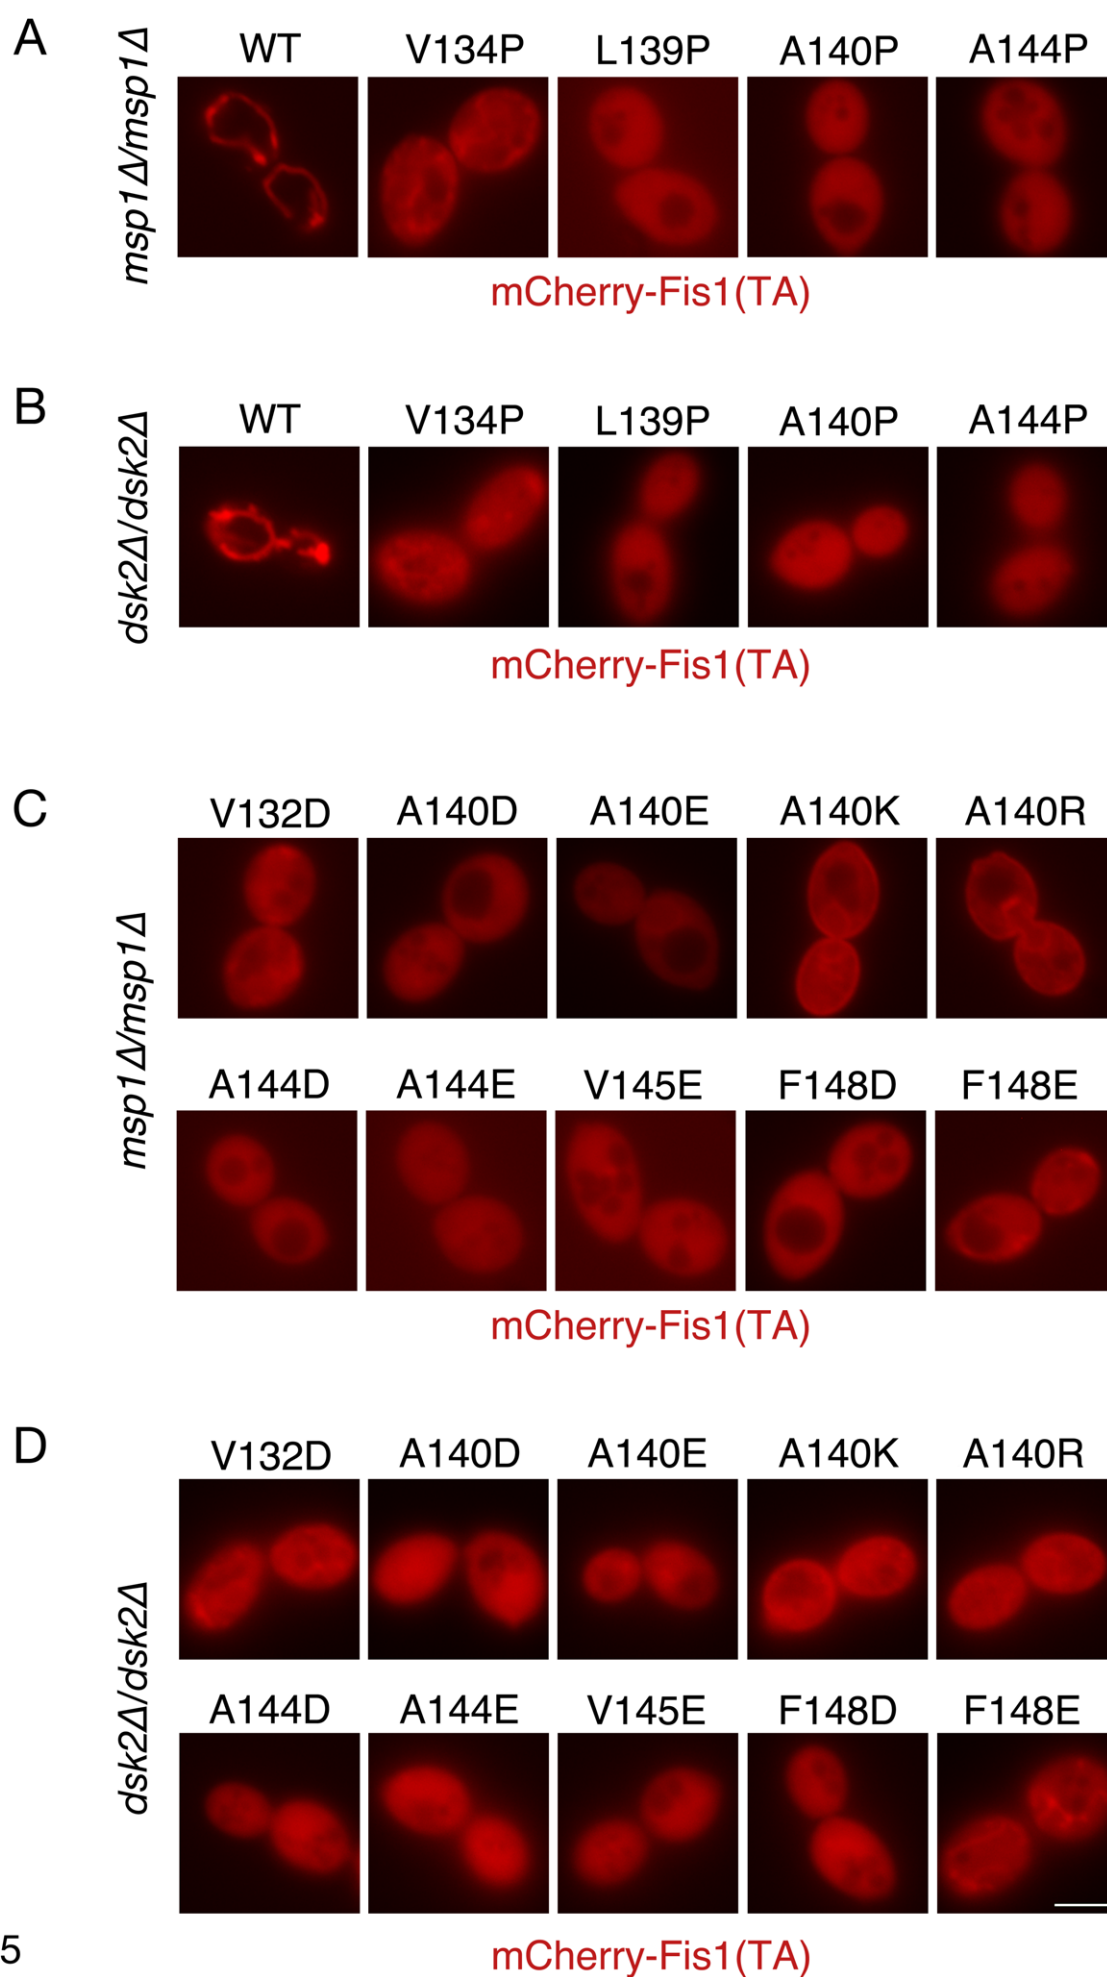

Figure S5

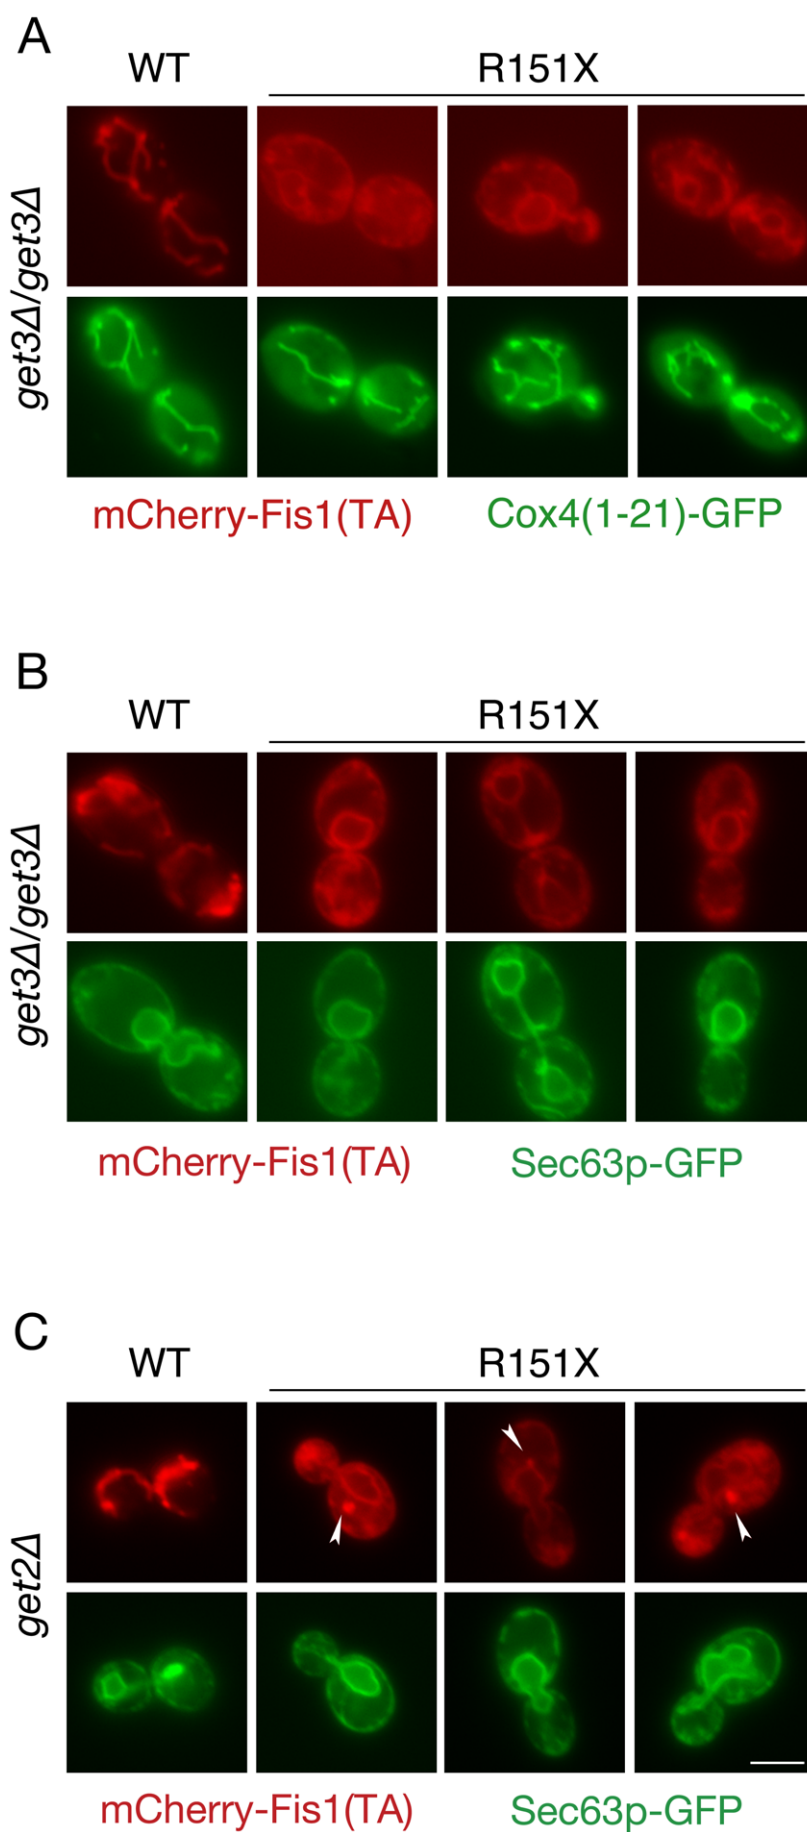

Figure S6

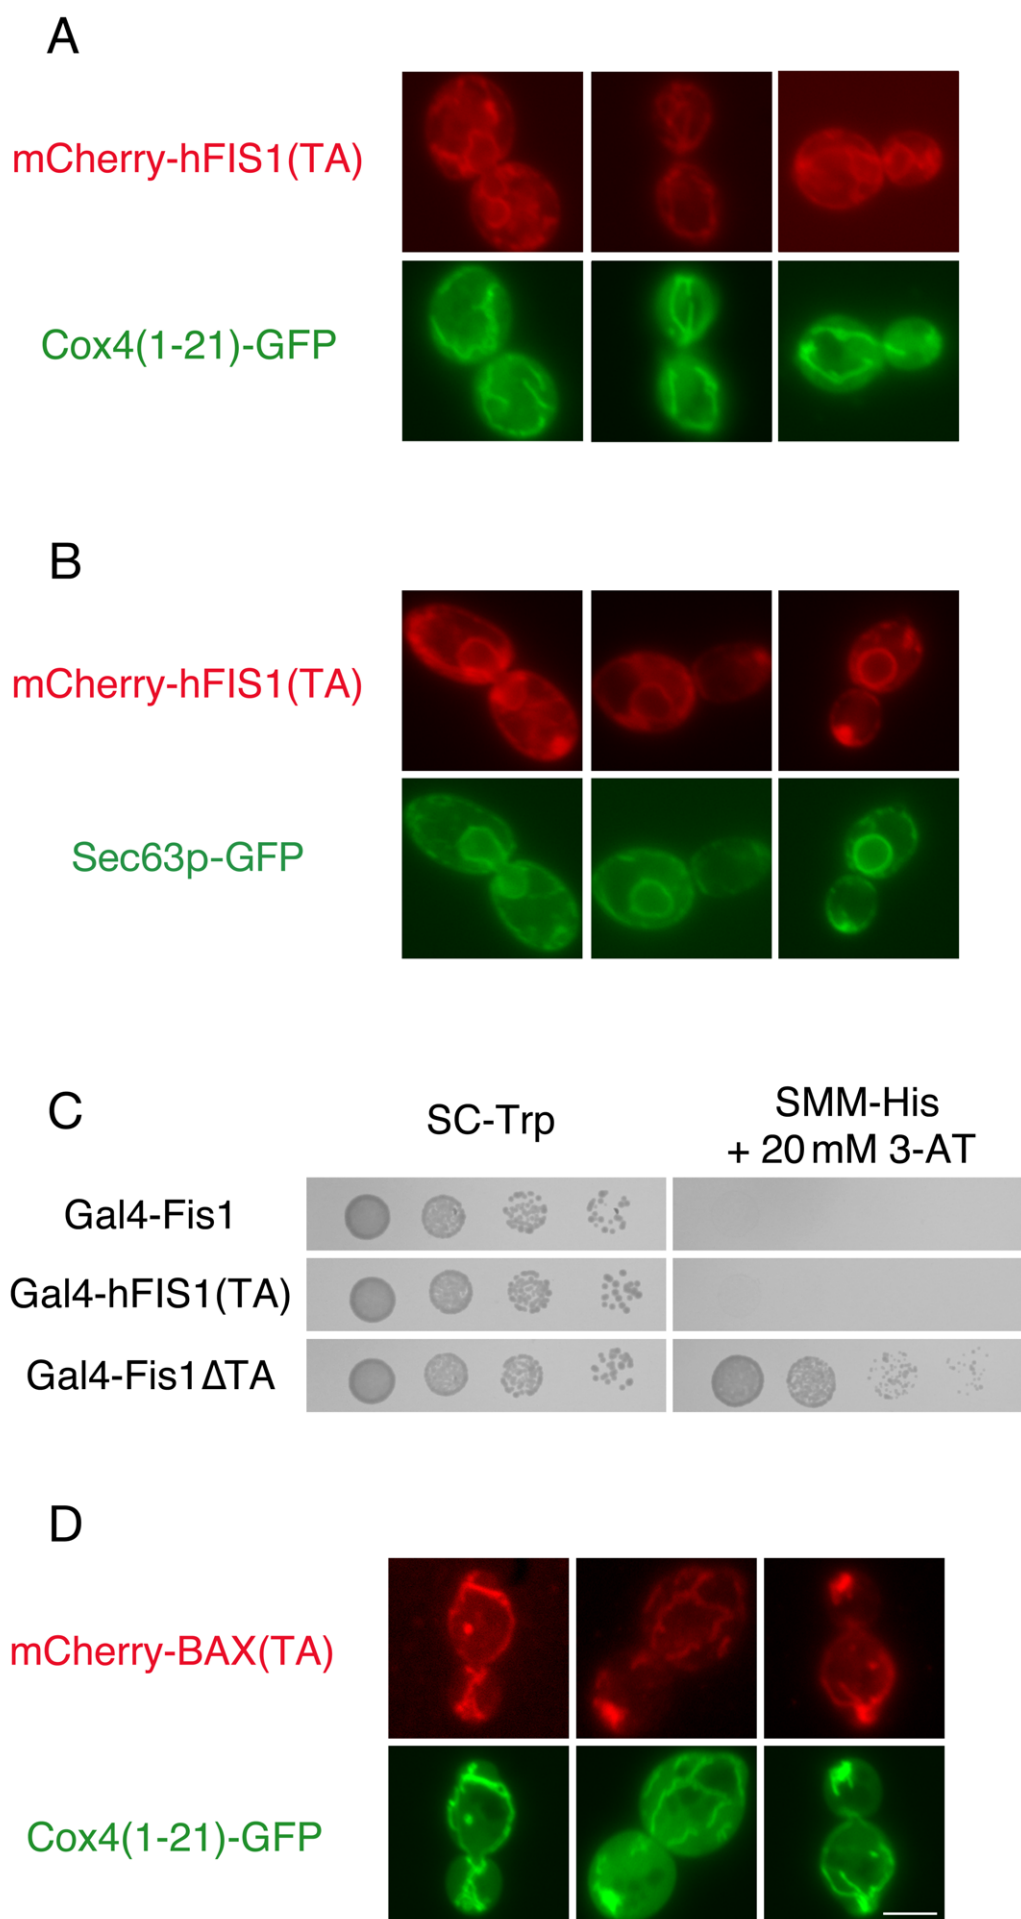

Figure S7

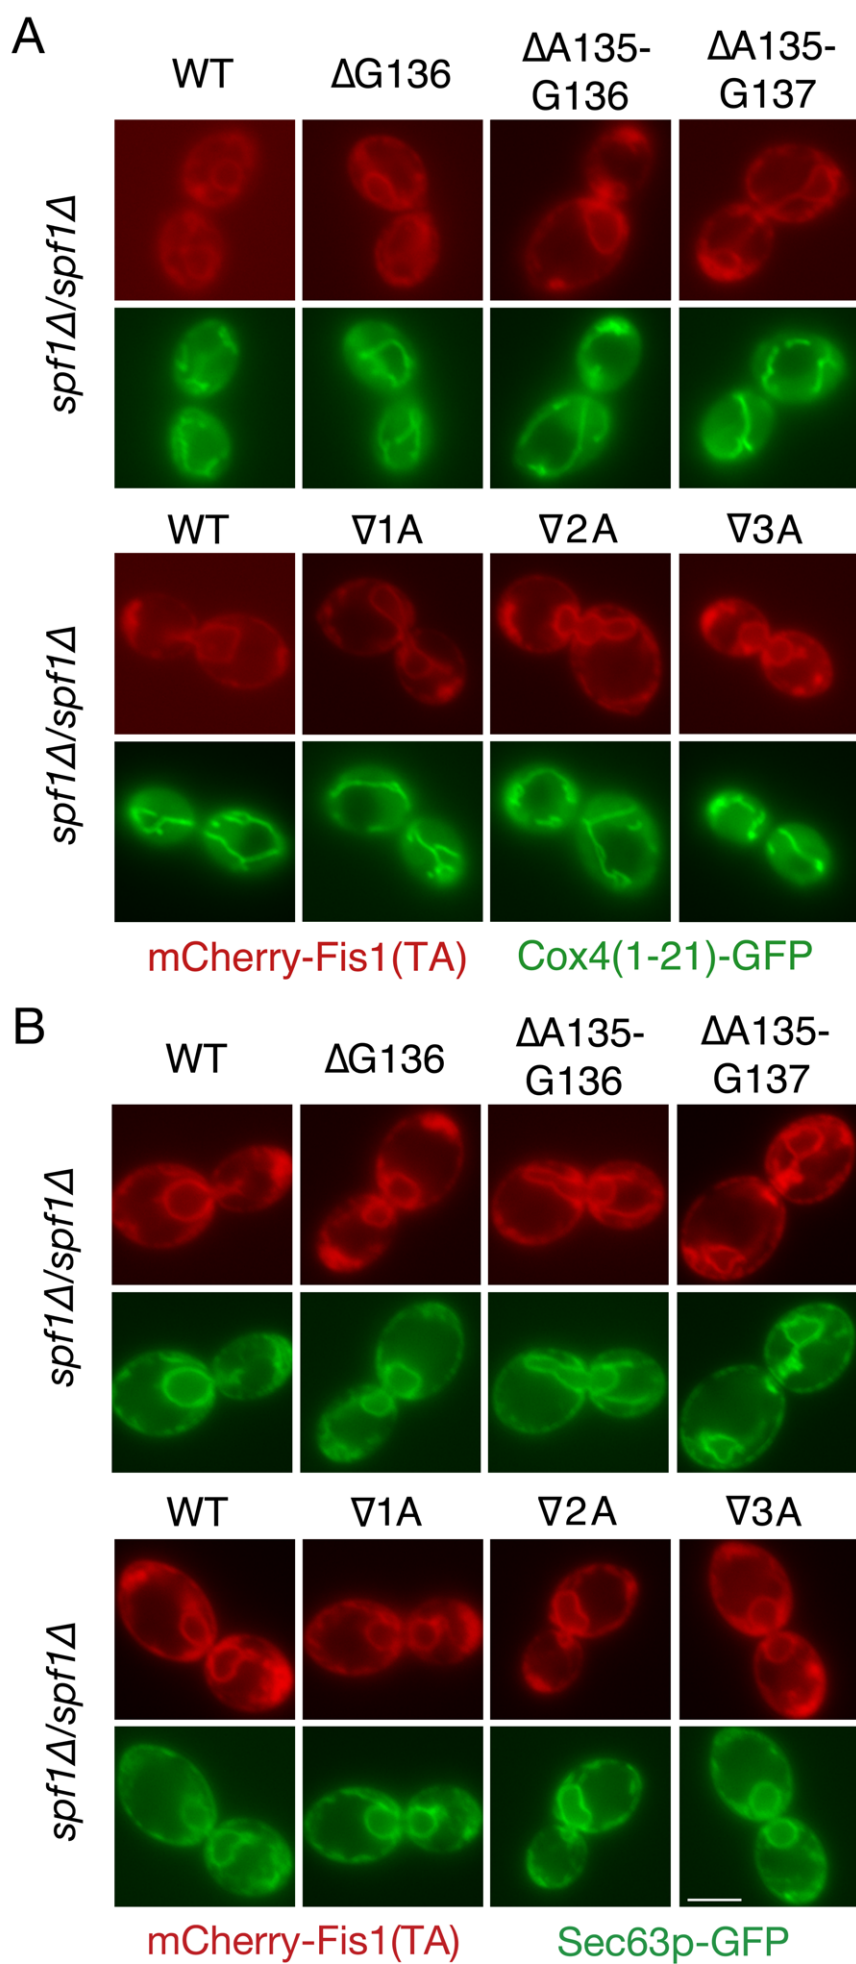

Figure S8

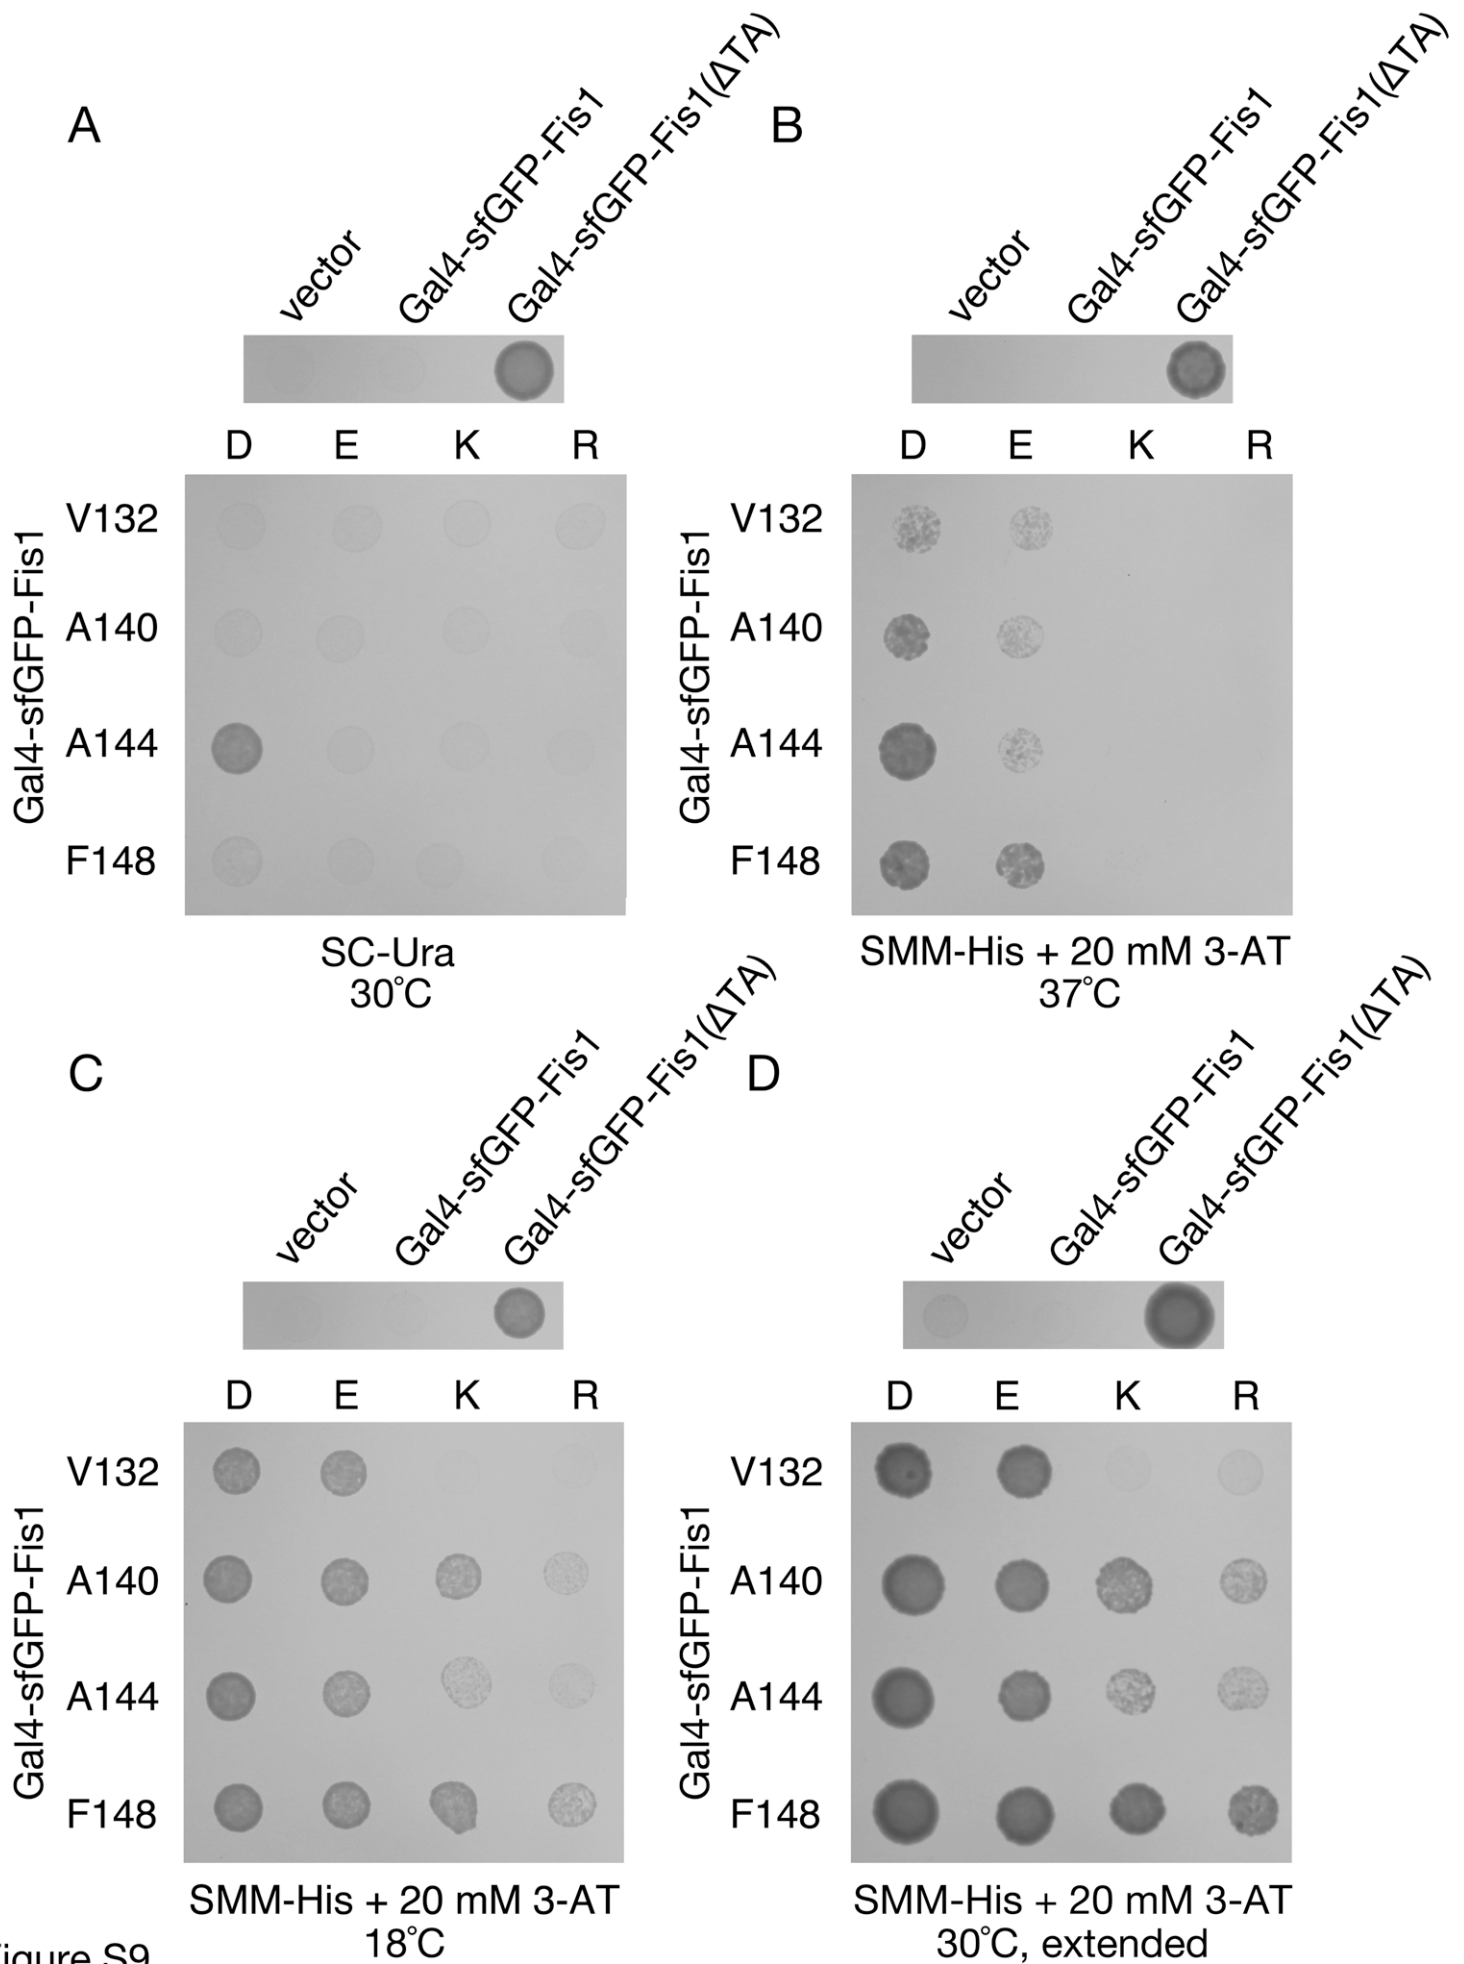

Figure S9

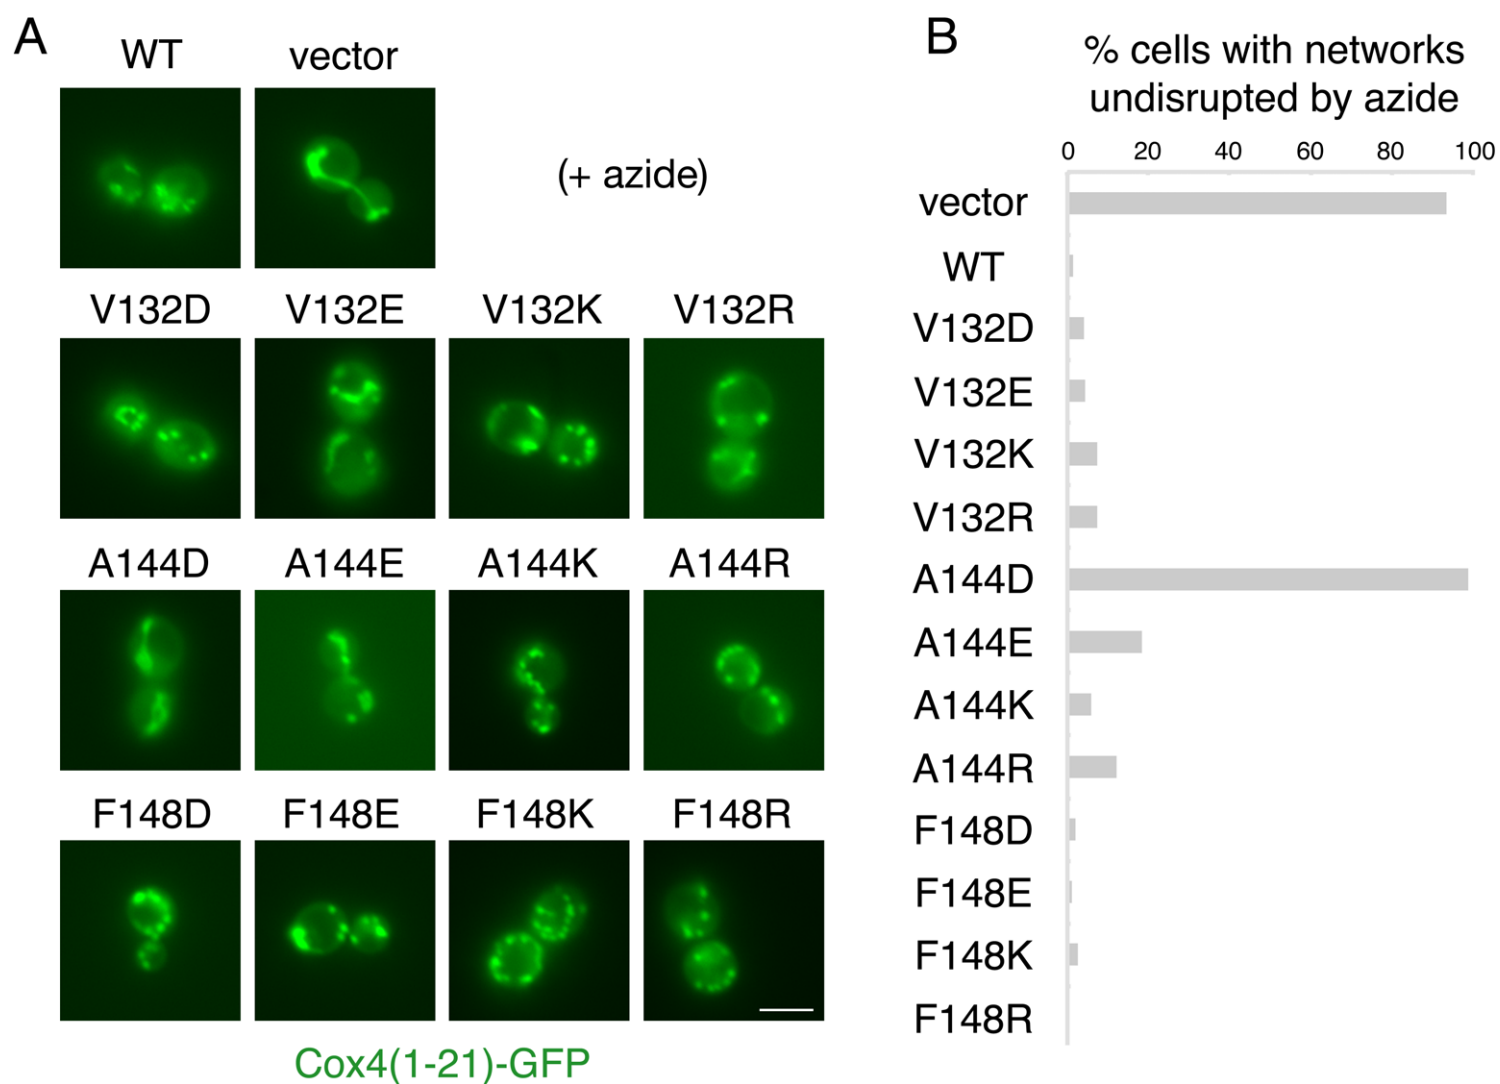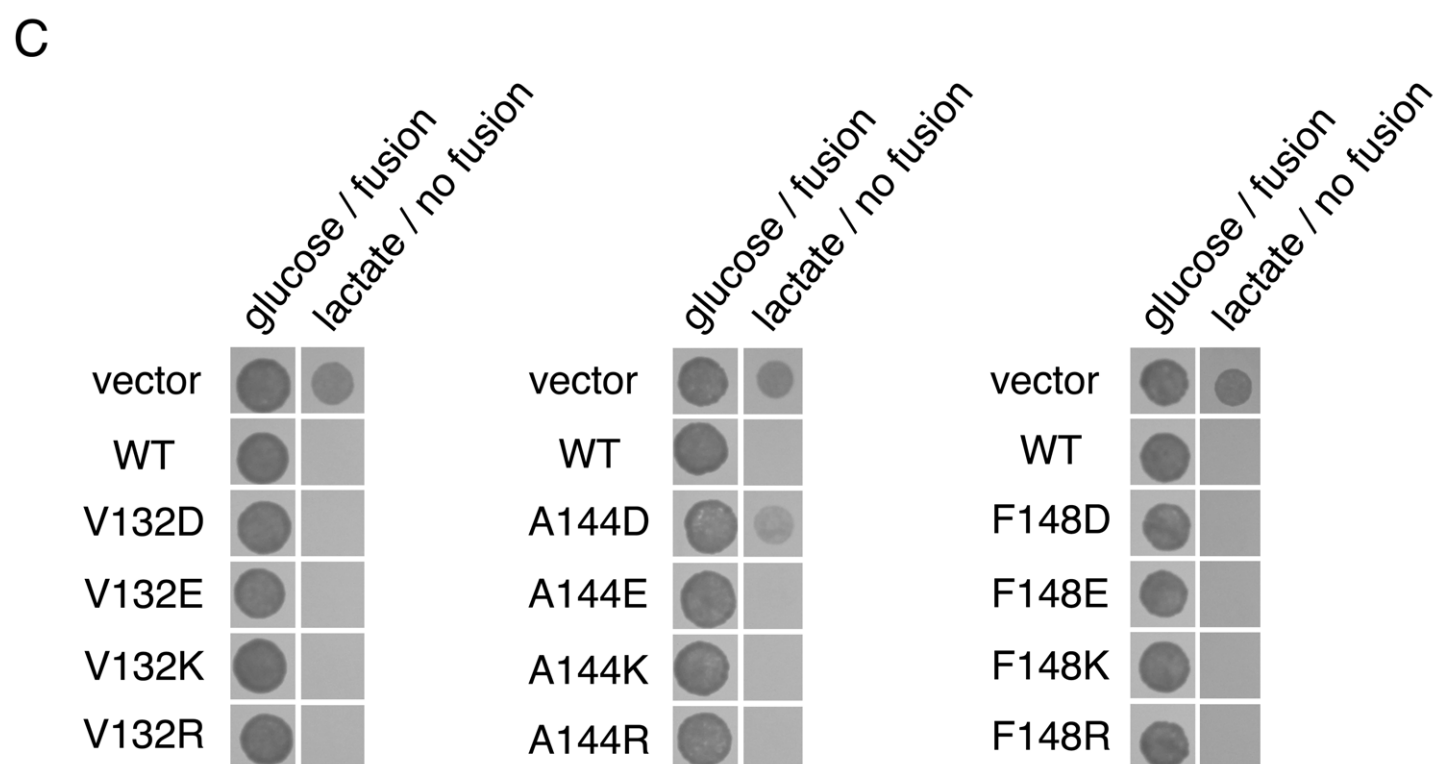

Figure S10

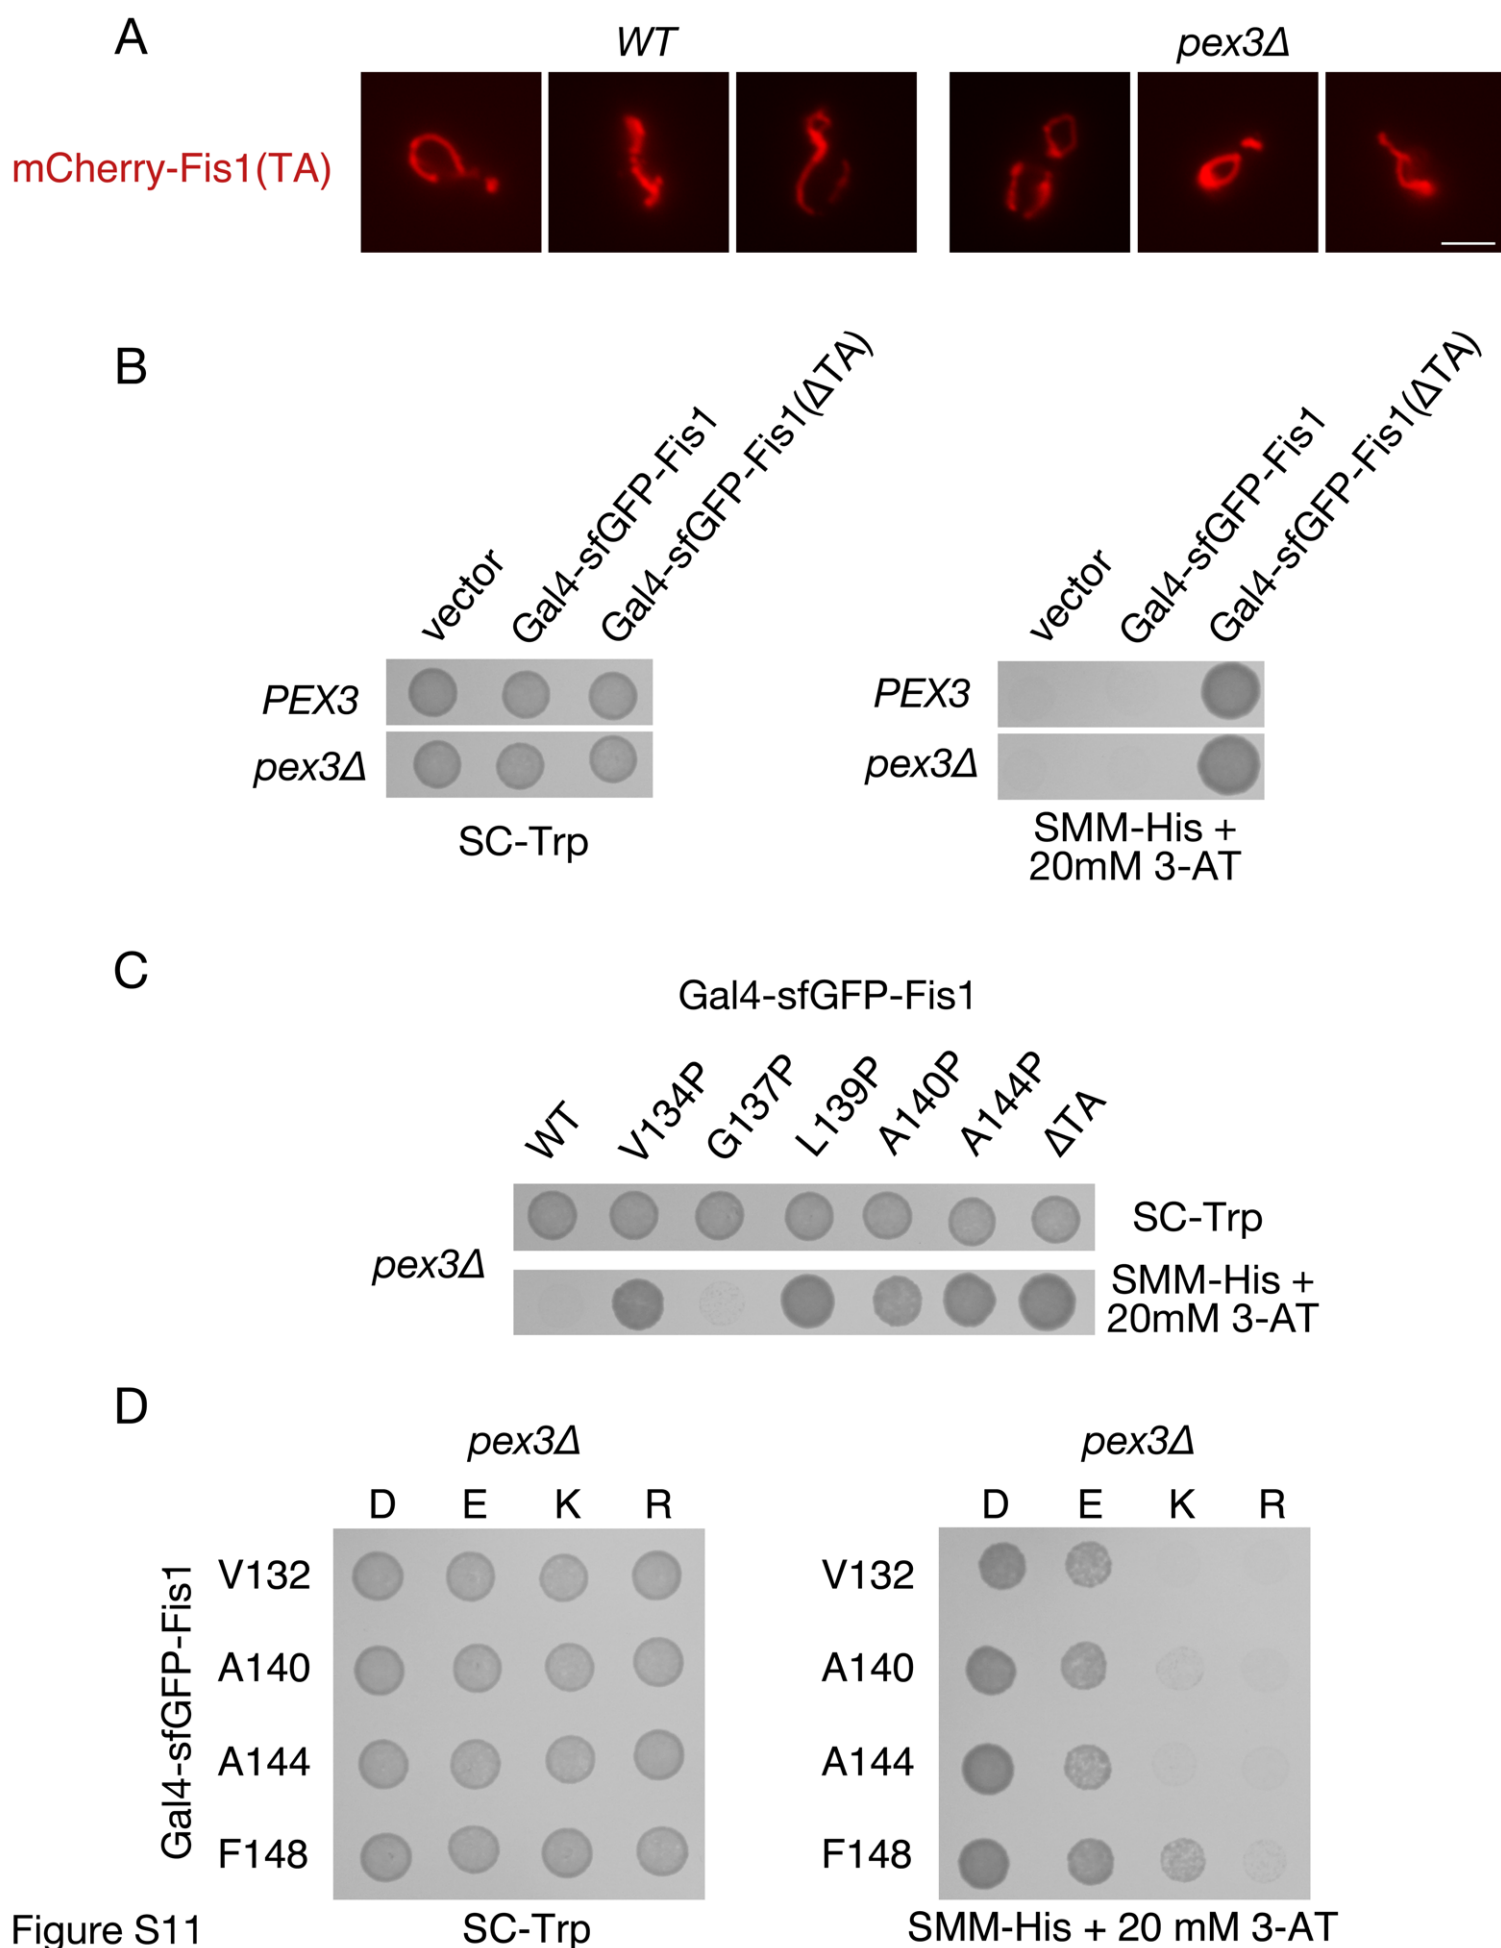

Figure S11
